# Supplementary material for: Multiomics Integration of Serum Proteome and Autoantibody Profiles Reveals Diagnostic and Prognostic Biomarkers in Glioma
Source: Research Square preprint supplement (doi:10.21203/rs.3.rs-7933102/v1), 2025-11-05
Supplement: Supplementary file 1 [file 40a513d23ee5e240b4d1244d.xlsx]

## Sheet: Sheet1
Differential autoantibody reactivities in the validation cohort
Sample	WHO grade	Gender	Age	IgM-p-APOE-1	IgM-p-MMP3-1	IgM-p-S100A12-1	IgM-EGFR	IgM-p-COL2A1-3	IgM-p-S100A4-1	IgM-p-EGFR-1	IgM-S100A4	IgM-p-SAA4-1	IgM-p-IL-1β-2	IgM-p-EGFR-2	IgM-p-COL1A2-2	IgM-p-COL2A1-2	IgM-p-S100A6-1	IgM-p-EGFR-7	IgM-p-IL-1β -1	IgM-p-P53-2	IgM-p-MMP2-2	IgM-p-S100A8-1	IgM-p-COL5A2-2	IgM-S100A8	IgM-S100A12	IgM-p-SAA4-2	IgM-P53	IgM-MMP2	IgM-APOE	IgM-p-EGFR-4	IgM-SAA4	IgM-p-EGFR-5	IgM-COL5A2	IgM-p-MMP2-1	IgM-p-S100A4-2	IgM-IL-1β	IgM-COL1A2	IgM-p-COL1A2-3	IgM-COL2A1	IgM-p-COL2A1-1	IgM-p-COL5A2-1	IgM-p-IGFBP1	IgM-MMP3	IgM-p-EGFR-6	IgM-p-MMP3-2	IgM-IGFBP1	IgM-p-EGFR-3	IgM-S100A6	IgM-p-P53-1
Glioma1	4	Female	65	421.323	154.357	16.0869	8.80948	69.7098	1283.89	75.4551	1045.26	1.14906	0	5.36229	10.7246	13.0227	0	0	182.318	4.97927	128.695	343.187	146.697	3577.42	565.722	81.5835	0	851.839	427.451	246.282	924.612	347.783	755.317	1621.71	12.6397	90.3929	4592.42	50.9418	207.597	306.8	120.269	71.6249	718.93	135.972	389.149	173.125	284.585	126.014	540.059
Glioma2	4	Female	60	6741.25	235.581	4556.26	120.569	139.174	676.058	86.9838	3304.18	136.516	100.515	241.139	68.8622	120.569	106.797	395.535	3257.06	33.1022	94.2325	307.826	84.8092	6882.84	757.001	382.004	2128.69	2991.76	1829.08	299.128	1762.15	85.7757	2457.78	1375.31	85.5341	1027.13	6063.98	441.685	1000.31	332.955	39.1427	370.648	1568.61	108.73	278.59	3744.17	88.9168	901.008	250.079
Glioma3	3	Female	36	15170.7	533.501	2635.61	862.348	360.016	1409.62	647.305	17731.2	273.033	123.71	947.64	279.556	373.064	423.08	930.002	8089.25	125.885	669.292	750.477	347.21	7793.99	297.195	248.87	3388.26	1181.05	1666.95	1200.14	1127.65	616.135	1127.65	1591.32	294.779	1326.75	2140.04	278.831	1395.12	574.577	216.251	1173.8	1081.26	508.855	413.173	1460.85	680.165	3443.83	915.505
Glioma4	4	Male	35	731.147	183.391	358.325	0	126.851	328.606	241.38	1256.43	9.90649	0	16.1887	0	12.806	13.0476	0	639.09	4.59081	40.8341	234.615	266.992	3407.35	123.469	181.458	221.326	747.578	794.211	698.287	260.227	86.5006	496.774	851.233	9.42325	200.788	1199.17	142.074	240.414	709.16	0	38.1762	830.212	3.3827	241.622	638.365	177.109	397.709	209.003
Glioma5	4	Male	35	1293.4	321.115	161.887	140.141	40.5925	564.912	276.899	1015.78	28.2697	36.9681	123.469	28.2697	36.4849	49.5325	151.98	1101.07	41.0757	82.8763	404.716	26.82	2926.76	121.052	125.402	334.163	744.678	1906.4	354.701	581.584	271.1	725.832	259.502	72.4865	343.345	917.438	176.142	372.581	360.5	7.00703	114.77	401.575	265.784	278.59	437.094	526.735	465.363	324.256
Glioma6	4	Male	45	5492.29	131.418	1209.33	41.6118	18.8076	158.454	247.555	3022.38	0	87.9255	0	63.4756	43.9628	64.416	3.29133	3849.92	35.9695	110.965	275.766	73.8198	4362.89	313.147	539.778	1709.38	6502.96	4995.77	205.943	675.898	270.124	1945.88	1243.42	84.6342	1291.85	4884.33	188.546	1673.88	730.91	42.7873	202.887	3203.64	34.7941	490.408	3886.36	137.06	4045.51	448.796
Glioma7	3	Male	39	796.032	872.202	109.084	68.6477	83.9289	471.601	244.969	1056.75	18.8076	57.1281	0	0	26.5657	272.24	244.264	1993.61	107.674	141.057	419.174	0	1261.28	121.309	35.9695	351.702	3817.94	6363.08	75.4655	501.458	126.246	1621.21	707.401	173.97	952.84	2442.4	336.891	410.241	169.268	1.64566	2169.46	2902.01	17.397	352.878	796.737	116.372	910.523	2580.87
Glioma8	4	Male	35	2807.86	226.391	392.374	153.791	98.0935	1962.7	3.60231	3983.87	0	23.2764	0	63.1789	65.1186	86.7324	146.032	4752	8.59011	131.346	259.089	72.0461	1601.09	359.399	290.955	1204	1318.17	1831.63	535.912	612.392	220.849	726.834	1776.77	52.372	990.911	2253.93	583.019	1265.24	1123.09	8.59011	882.842	629.018	39.6254	228.054	962.093	0.554201	263.245	212.813
Glioma9	2	Male	42	17080.7	551.707	3488.14	159.61	186.766	1092.61	162.658	4666.09	82.2988	16.626	36.3002	28.8184	49.8781	167.923	85.624	14389.3	49.601	123.587	578.586	829.916	1695.3	286.799	5390.71	216.138	1413.77	6621.04	504.323	1128.91	755.099	1462.81	6920.86	125.526	1420.69	6415.98	208.102	233.596	2555.97	35.1918	941.864	1250	154.345	159.61	647.861	279.317	127.189	206.717
Glioma10	4	Female	31	3189.28	704.532	1581.93	241.139	504.067	3107.57	694.364	5367.16	634.079	521.136	656.595	314.134	338.466	1165.02	1055.71	4698.58	644.611	660.59	3813.55	396.209	2751.67	317.766	369.335	3672.65	3901.8	13058.9	907.539	2264.31	1076.05	3732.93	1448.65	845.076	4438.92	12229.1	775.712	2691.39	697.269	293.434	1406.16	1638.22	988.161	1150.49	3681.73	498.983	2369.63	1163.2
Glioma11	2	Female	54	2482.29	499.125	3835.51	971.59	90.8397	4063.6	1700.78	4985.32	81.9532	50.3568	219.2	0	135.766	176.742	352.991	7878.86	65.1676	145.146	1769.4	160.944	3804.41	245.86	507.517	807.683	9744.04	15445.7	1196.71	1938.24	847.179	4218.62	2898.97	176.249	10004.2	11436.9	857.546	584.534	2624.48	0	871.864	7772.72	3034.24	428.033	2527.71	484.314	1599.07	617.117
Glioma12	3	Female	50	526.915	329.179	80.2322	71.4123	45.5218	135.996	278.821	1690.85	4.26767	10.2424	4.83669	18.4932	26.7441	2.84511	77.6716	202.287	34.1413	104.416	436.156	17.3552	5936.61	149.653	121.486	1407.76	663.765	1397.52	1848.75	1095.37	757.084	5743.71	2151.76	6.25925	870.32	2674.12	214.521	682.542	290.77	31.8653	443.268	1955.16	118.357	255.776	10689.7	1646.18	4432.4	328.041
Glioma13	4	Male	25	826.279	611.581	359.772	31.5912	45.0865	272.973	273.893	2254.02	18.0959	67.4764	88.026	35.8852	77.5978	5.21408	100.294	158.263	108.576	125.751	368.973	25.1503	1475.59	455.159	154.582	269.906	1157.83	1155.38	267.145	164.397	89.8663	4496.69	731.812	14.7221	881.487	2954.24	257.944	303.337	274.506	77.5978	276.653	496.565	61.6489	175.132	607.901	100.601	193.535	189.547
Glioma14	4	Male	63	281.417	107.565	206.874	213.915	210.516	202.746	73.5714	766.065	73.3286	77.2135	218.286	70.4148	157.584	122.862	371.499	136.216	110.964	313.467	260.778	150.785	1797.52	371.985	271.947	522.041	1092.16	775.049	128.204	695.407	108.779	1051.37	357.659	196.433	285.059	2460.88	344.061	998.677	768.736	43.2201	128.932	582.501	200.561	470.808	788.889	216.101	209.788	337.748
Glioma15	4	Male	56	3853.42	253.425	56.4384	0	36.1644	548.219	132.877	628.493	3.56164	4.10959	7.94521	4.10959	6.0274	14.5205	0	887.397	7.12329	27.6712	19.726	407.945	1258.36	375.342	568.767	650.137	738.356	1005.48	244.658	672.877	143.836	349.863	2107.67	71.5068	183.288	576.986	15.6164	92.6027	690.411	0	241.37	252.603	11.7808	46.5753	1092.33	156.438	269.863	473.425
Glioma16	3	Male	49	313.591	1315.07	39.8391	0	71.5207	818.789	392.321	932.615	33.9581	24.2829	111.17	28.6462	39.0803	25.2314	123.881	516.77	37.5626	93.7168	567.233	71.1413	8647.56	539.346	356.276	1790.48	4818.26	1250.95	1693.92	991.994	215.131	1470.63	1710.05	67.9162	1795.23	2270.83	916.49	536.5	1461.34	34.717	616.937	1983.99	140.196	465.928	2024.97	135.832	696.805	203.749
Glioma17	4	Male	34	165.617	955.76	232.774	0	52.1703	132.418	656.018	928.821	17.0739	17.0739	44.9613	12.5209	14.2283	4.17362	31.6816	27.8874	14.418	13.8488	694.529	593.603	2901.24	304.485	1647.06	28.0771	930.149	1328.54	2273.49	334.459	67.7265	1213.77	3534.68	12.3312	505.008	1377.86	673.092	310.935	615.609	0	875.892	1078.88	66.3985	2064.62	2005.43	106.617	505.008	408.825
Glioma18	4	Male	38	702.781	31.6232	8.05311	0	5.30327	1940.8	89.3699	589.645	0	1.1785	1.57134	0	0	0	0	103.708	12.5707	0	54.4076	20.8202	2549.69	936.518	214.291	905.091	939.268	871.504	33.5874	888.003	23.3737	1121.15	5160.28	125.904	645.82	1250.79	35.748	75.0314	16.1062	0	626.571	756.207	0	41.0512	1134.51	0	429.172	212.524
Glioma19	4	Female	49	1162.4	89.7627	109.208	69.7282	69.1389	128.653	26.9092	652.106	0	16.4991	14.9277	32.016	60.693	7.26744	93.2982	104.69	22.588	145.152	57.5503	63.8356	980.908	88.1914	37.7121	94.0839	1184	1100.13	39.2835	174.615	151.438	501.453	108.422	20.6238	202.113	340.784	86.0308	263.003	123.743	10.0173	135.135	358.854	43.4082	96.6373	89.1735	47.533	81.906	88.3878
Glioma20	3	Male	48	1247.86	839.827	1.14029	10.6427	46.562	305.029	41.2406	148.428	13.6835	24.7064	10.4527	15.7741	12.5432	39.3401	24.8964	181.117	67.8475	17.6746	530.237	146.338	2385.69	178.836	254.856	599.225	628.492	779.961	172.755	218.936	213.235	420.768	1418.53	117.26	75.2594	560.645	107.948	184.348	140.636	6.65172	571.667	405.755	28.5074	169.334	825.763	27.177	27.3671	444.145
Glioma21	2	Female	44	868.904	1041.85	104.527	21.6656	6.84176	711.163	685.317	548.481	0	9.12235	74.4992	22.6158	0	10.4527	12.7333	2287.81	36.6795	21.6656	262.458	29.8377	1924.63	358.813	665.172	183.587	4380.82	1676.99	88.5628	617.849	162.872	831.084	400.053	83.0514	545.251	597.514	77.1599	174.465	174.845	3.23083	278.232	1455.78	5.89152	916.796	1245.01	3.80098	337.527	313.771
Glioma22	3	Male	41	595.804	420.578	84.7619	31.5481	25.4666	930.67	83.8116	785.092	34.2088	30.4078	41.0506	19.575	30.978	12.9233	28.5074	1643.73	11.9731	111.179	627.162	18.4348	1714.05	441.864	451.366	118.401	674.294	3271.88	235.471	437.873	74.3092	825.573	233.76	16.1542	349.88	410.506	312.631	150.329	476.643	2.09054	339.047	3462.12	9.12235	336.007	1189.71	113.269	247.064	447.755
Glioma23	4	Male	35	821.962	499.259	336.007	79.2504	122.582	304.839	29.0775	1656.47	29.8377	40.6705	54.7341	19.0049	13.8736	13.3034	84.9519	391.311	231.86	41.6207	298.187	1532.18	1550.61	134.745	163.632	176.556	495.268	1569.23	213.615	469.421	138.356	1755.29	967.159	40.2904	179.406	1238.55	163.062	180.166	440.914	18.8149	393.021	384.469	60.4356	155.27	834.125	52.4535	231.48	251.815
Glioma24	4	Male	60	217.226	118.02	30.0277	21.8556	28.6974	421.529	513.322	3696.83	6.08157	26.987	7.98206	11.0228	0	4.75123	0	198.981	32.8785	15.584	313.581	66.7072	1664.07	401.954	1170.7	48.4625	1017.52	406.705	350.45	313.581	43.3312	1276.56	1534.65	30.978	282.793	2644.15	173.515	4.18108	1221.44	1.33034	714.584	215.135	42.761	215.706	893.04	22.2357	134.935	310.35
Glioma25	3	Male	38	94.4812	63.1411	464.571	7.37414	2.53486	695.474	128.356	137.574	14.2874	4.83928	0	0	0	0	2.30442	53.9234	0	8.75679	340.823	0.691326	803.09	106.925	88.9506	139.187	599.149	913.471	15.9005	165.457	34.1054	455.584	777.28	27.1921	147.022	400.738	51.3885	50.9276	593.618	0	235.742	144.026	4.14795	202.098	635.789	54.6147	254.408	176.979
Glioma26	4	Male	46	405.347	611.362	349.811	24.1964	14.7483	605.371	156.931	563.891	25.1182	8.52635	0	0	0	4.60884	0	664.825	46.7797	125.591	2802.17	161.54	4470.57	111.303	234.129	458.349	621.963	2557.44	3115.8	434.844	764.376	1481.05	3751.36	159.466	200.484	9975.14	156.47	179.514	1302.92	0	597.075	1583.6	7.1437	223.068	965.321	287.361	0	362.715
Glioma27	4	Male	46	337.828	191.958	683.26	0	162.922	725.431	144.026	393.364	21.4311	5.99149	0	0	14.5178	7.1437	10.6003	624.497	30.4183	65.4455	848.717	980.991	2805.63	309.023	158.083	127.895	1135.39	2040.33	475.171	750.319	81.346	1101.28	1802.52	224.911	2302.81	1702.04	432.539	102.547	2262.48	32.7227	203.711	619.889	26.0399	174.675	547.299	16.3614	0	253.025
Glioma28	2	Male	39	1381.96	222.376	390.138	0	4.14795	127.895	2695.25	4867.16	7.37414	0	0	0	0	0	0	501.211	3.68707	26.0399	460.423	0	1776.48	905.636	260.169	0	595.001	968.086	1941.7	20131.4	214.541	30131.4	3659.88	36.6403	37.3316	3043.68	2558.37	33.1836	201.176	3.22619	488.998	3589.36	0	484.158	26000.8	0	0	82.2677
Glioma29	2	Male	41	215.694	122.365	205.554	18.2049	0	1005.88	362.255	1107.27	7.60458	8.29591	22.3529	0	13.5961	7.1437	0	188.041	13.3656	7.83502	642.933	2.7653	2862.55	386.221	402.121	25.8095	715.292	1363.75	96.3247	132.735	41.4795	1800.21	956.334	12.9047	184.353	682.799	42.1709	68.9021	86.1853	0	117.756	356.033	641.32	71.2065	335.293	129.969	43.784	195.876
Glioma30	4	Female	60	96.6077	17.5946	80.968	1.62913	0.814567	49.5257	13.0331	444.265	0	0.814567	0	0	0.814567	0	0	157.537	9.44898	6.35362	23.2966	4.07284	594.471	55.2276	12.3814	87.9732	177.901	264.571	318.007	88.2991	14.6622	2016.22	61.4184	10.2635	157.049	1578.63	1.62913	44.4754	5.05032	2.60661	20.0384	78.3614	5.05032	13.0331	214.72	9.12315	0	102.473
Glioma31	3	Male	46	1166.3	321.644	129.863	21.6438	20.8219	3246.3	538.63	1021.37	8.21918	7.67123	22.4658	18.0822	33.1507	9.31507	18.9041	222.192	63.2877	83.0137	75.8904	22.1918	6360.82	378.63	534.795	45.4795	1380.82	928.493	3639.45	533.151	83.0137	1293.97	4096.71	208.767	352.329	956.986	1486.03	258.356	1170.14	683.288	529.863	1280.55	33.4247	360	503.836	121.644	248.767	278.63
Glioma32	2	Female	34	6464.24	675.684	447.491	18.4026	57.9683	3417.68	603.914	3098.7	3.98724	19.0161	0	15.949	23.9234	30.0577	0	6347.99	107.042	91.7065	292.602	146.608	5282.17	378.174	653.294	3496.81	15552.1	11899.8	443.197	2233.77	214.391	3013.74	3177.52	120.844	3326.89	3318.61	1122.87	631.211	1136.06	31.2845	908.477	9723.65	10.1215	662.189	2732.18	158.57	2033.8	979.021
Healthy1		Female	36	1988.71	1835.97	49.3804	12.5751	69.9301	8184.89	1449.21	3026.32	0	28.5241	78.518	34.6583	81.2784	28.8308	155.809	1985.95	169.918	470.188	4498.22	76.0643	7022.14	1474.05	1820.64	205.496	3790.03	12640.5	1018.89	1195.87	508.527	1792.11	2535.58	55.5147	818.305	7866.83	341.369	566.188	349.65	150.288	579.377	3454.79	98.1475	531.223	1977.06	832.72	453.012	2257.39
Healthy2		Female	38	219.986	250.58	117.763	705.848	495.089	285.787	270.004	679.382	546.808	263.934	540.009	385.825	489.99	586.386	827.981	60.9453	264.663	509.901	86.9259	397.722	2200.59	50.2616	193.762	816.326	2505.07	4926.85	491.933	451.141	389.953	915.636	841.822	184.778	775.777	1102.11	106.593	1020.29	332.649	206.388	779.905	1006.69	434.63	431.23	342.362	464.495	0	803.7
Healthy3		Female	49	1266.13	630.217	133.366	75.6943	77.5914	111.739	529.86	1115.87	68.6751	25.0417	145.697	12.7106	62.0352	32.6301	149.681	648.429	15.1768	159.167	336.925	293.292	3484.6	379.041	685.233	254.022	1774.93	2505.31	365.761	701.169	220.823	2257.93	3159.05	39.4597	359.88	2777.74	134.694	492.298	677.834	48.3761	680.49	686.182	191.418	430.263	2064.05	106.997	507.854	658.104
Healthy4		Male	28	1530.48	203.096	589.252	88.9771	151.438	680.783	328.606	2913.46	0	17.4811	0	23.7665	36.3372	19.2489	88.1914	1005.46	102.333	152.42	408.941	395.977	10606.7	620.09	233.54	551.736	3515.48	2063.36	306.411	979.337	149.081	2262.14	1428.35	66.9783	1907.61	9804.76	74.835	800.008	328.41	0.392835	574.717	2117.97	43.6047	348.052	1452.9	301.893	514.221	162.241
Healthy5		Male	55	4792.58	520.113	871.7	154.777	153.402	2203.8	1129.79	3793.21	0	22.9808	26.1235	66.5855	211.149	77.3884	130.618	1853.79	211.149	940.839	503.025	121.386	8793.6	393.62	1775.42	332.731	5934.36	16555.4	1682.71	797.847	556.843	2862.59	6363.14	291.483	1472.54	4746.23	3063.72	984.837	1957.1	73.0673	1244.89	2045.69	123.939	1777.77	876.807	1228.98	311.321	1101.12
Healthy6		Male	51	1662.97	236.643	134.575	46.1402	11.7098	583.044	687.908	2015.84	1.57296	12.5837	23.4196	8.56389	0	23.5944	27.4394	3177.55	327.875	63.6175	254.819	12.2341	3697.33	852.894	683.713	611.881	2682.77	1533.46	545.817	974.711	543.37	3004.7	721.464	52.9563	317.738	3229.46	247.129	400.231	403.901	4.71888	358.46	1486.1	16.0791	717.444	2273.45	102.068	1443.28	738.942
Healthy7		Female	50	30.9349	348.323	84.2407	160.267	153.276	226.681	0	130.031	182.114	43.3438	89.6587	17.8269	5.2432	24.2935	245.731	80.0462	0	89.8335	0	34.0808	524.495	54.704	29.7115	252.373	855.341	183.512	48.9365	501.425	36.5276	1925.48	53.4806	0	67.4625	139.469	519.601	328.574	15.7296	0	173.55	136.148	63.2679	191.901	162.364	0	0	105.913
Healthy8		Male	37	726.268	48.7111	37.3072	3.90992	5.86488	84.5521	81.1309	5289.47	0	4.07284	0	23.2966	3.90992	15.8026	19.7125	149.717	0.651654	28.184	57.0197	3.09535	3711.49	406.958	77.7097	70.7044	578.506	329.411	242.252	375.678	212.928	3031.49	280.7	65.0025	111.922	1777.39	30.6277	107.36	58.1601	0	65.817	408.75	0	252.516	309.21	51.9694	141.409	625.588
Healthy9		Male	49	88.6249	104.59	97.4222	35.678	16.943	195.007	55.0647	650.676	0	5.53906	0	0.162913	0	39.588	79.1759	242.904	16.2913	30.139	1681.43	57.0197	817.825	199.895	102.473	101.169	800.557	442.636	445.405	281.84	0	1335.56	547.063	0	64.3508	2219.53	172.851	376.982	1449.11	0	479.617	182.463	12.7072	51.4806	618.582	160.307	7.49402	87.9732
Healthy10		Male	68	321.265	75.7547	289.823	28.0211	9.28606	174.643	103.613	4380.74	0	2.4437	21.3417	18.735	5.53906	3.90992	0	133.915	12.5443	87.6474	772.047	38.9363	2849.03	110.944	239.809	143.364	702.971	725.942	470.983	215.209	93.8381	595.286	1352.67	16.6172	136.847	1547.68	114.854	293.407	1058.77	9.77481	260.661	504.543	63.2104	54.576	659.962	24.7628	0	1048.18
Healthy11		Male	58	311.002	85.0408	425.693	18.5721	119.253	151.835	370.954	930.561	0	8.4715	0	0	5.86488	8.79732	42.5204	62.07	8.30858	43.0091	1113.02	708.348	1013	268.807	103.45	38.7734	487.111	115.669	28.5098	210.647	640.413	4982.87	618.582	11.0781	166.335	417.221	17.7576	165.194	133.1	0	60.6038	235.899	2.4437	533.379	169.104	64.6766	528.98	504.543
Healthy12		Male	52	764.127	191.127	24.1303	0	37.153	1827.39	452.348	2713.7	0	4.21323	16.4699	24.8964	3.83021	2.29813	9.57552	129.461	0	60.1343	930.741	576.83	5073.11	520.142	119.503	753.785	2627.52	1894.42	132.525	893.971	430.899	1536.3	4238.13	43.6644	3543.33	3394.71	147.846	460.008	777.149	0	1204.6	783.661	3.06417	639.645	915.803	20.6831	121.801	240.92
Healthy13		Female	59	1084.72	598.662	139.42	0	52.4739	2867.68	162.018	4134.71	2.29813	13.0227	0	7.66042	25.6624	6.89438	14.9378	1074.76	237.856	132.908	479.925	165.465	8764.28	535.846	240.154	676.415	3046.55	7594.92	671.819	546.954	533.548	4107.13	1813.99	72.391	631.985	2996.76	898.567	1516.38	420.174	44.8134	316.758	1527.87	44.0474	871.756	1603.71	50.1757	495.246	1062.5
Healthy14		Female	54	562.658	153.591	43.6644	0	0	545.805	49.7927	1772.24	0.766042	11.4906	0	0.383021	8.80948	0	5.36229	128.695	32.9398	55.538	881.331	0	612.45	203.384	1233.33	714.334	1811.69	1000.07	26.8115	511.716	37.153	2125.77	1093.52	11.8736	160.869	1964.9	154.74	240.154	159.337	57.4531	393.362	560.36	0	34.8549	953.339	8.42646	443.921	505.205
Healthy15		Female	47	872.522	215.258	409.832	3.83021	6.12833	389.149	332.462	629.686	0	3.83021	0	8.80948	6.51136	2.68115	0	182.701	0.766042	2.68115	209.895	21.0662	1268.95	278.073	638.879	54.389	455.029	893.971	194.575	338.974	201.852	1481.91	1412.58	9.57552	89.6269	543.89	34.4719	460.008	650.37	0	551.933	291.862	8.42646	429.749	914.654	98.4364	252.028	948.743
Healthy16		Male	52	2367.07	1178.56	813.919	96.1383	10.3416	1344.79	1224.13	4236.98	0	7.66042	21.0662	0	37.5361	8.80948	97.2873	958.701	0.766042	0	150.527	0	3958.9	225.982	1158.26	165.465	635.432	815.069	238.622	2747.03	4.21323	5443.88	1943.83	12.6397	393.746	1821.26	225.216	523.59	268.115	0.766042	358.508	420.557	0	1216.47	2016.61	0	0	214.492
Healthy17		Male	38	757.817	192.95	617.824	3.14592	7.34048	103.815	265.131	779.489	0	0	2.79637	0	1.39819	5.59275	0	204.135	177.744	55.0536	255.169	121.293	1853.3	359.159	1718.72	557.876	908.297	956.884	60.9959	529.039	366.325	676.198	2695	32.3331	1890.87	365.451	88.6101	182.988	538.826	29.1871	789.975	585.491	21.4971	430.467	2323.61	401.629	110.282	776.518
Healthy18		Female	46	1477.26	932.603	544.384	50.6849	36.4384	647.397	389.863	2524.38	0	12.6027	0	28.7671	26.8493	43.8356	115.616	1013.42	33.6986	77.5342	549.041	63.2877	2510.96	89.0411	597.808	174.521	1234.52	1187.4	1981.64	876.438	317.26	2569.04	1395.34	167.397	441.644	2086.03	357.534	691.507	1805.75	24.3836	1750.14	483.562	53.4247	532.603	1796.44	187.123	0	961.644
Healthy19		Female	44	732.65	81.0948	117.273	9.78731	18.3512	1339.29	88.2605	4661.03	0.349547	4.01979	2.44683	73.7543	0.174773	13.9819	14.3314	407.921	71.6571	91.0569	494.783	140.343	1914.29	7.16571	216.195	225.108	769.876	3591.42	229.128	471.538	160.267	629.184	7422.97	112.554	2747.79	1008.62	299.212	424.699	4385.41	0	2049.22	426.097	88.0858	408.62	1461.63	67.6373	117.448	1869.03
Healthy20		Female	46	1687.26	593.355	385.725	29.1871	26.7403	172.501	216.02	779.139	0	19.3998	0	5.94229	11.0107	26.0412	1.57296	1196.5	25.1674	24.9926	1411.29	19.7494	1066.29	21.6719	305.154	121.293	1800.34	1204.71	111.68	1239.32	382.579	1412.69	1014.56	17.6521	180.716	1665.07	196.97	149.781	340.284	0	262.859	721.639	5.59275	315.466	1223.76	457.557	1371.62	625.863
Healthy21		Female	55	1304.51	226.856	354.615	72.1814	49.4608	187.532	1016.48	1678.87	0	0	0	0	0	4.01979	23.9439	246.78	11.1855	5.06843	204.66	236.643	2239.72	105.563	697.87	73.9291	985.896	732.65	193.649	229.652	76.3759	713.25	1640.25	60.2968	225.807	3196.95	87.7362	205.883	1599.35	0	2046.95	584.267	5.94229	1844.56	752.574	1140.92	297.464	757.293
Healthy22		Male	54	111.995	53.693	62.4497	0	8.06546	1236.55	189.193	262.243	11.0612	0	0	0	0.691326	5.76105	0	266.16	2.7653	25.8095	486.693	0	3755.74	165.688	32.4923	133.195	721.744	1260.98	0	318.471	0	445.214	779.354	5.5306	294.505	757.001	947.807	494.528	235.512	0	419.635	400.277	44.0144	102.777	978.226	13.8265	127.434	250.721
Healthy23		Male	55	6655.62	970.621	1124.56	24.6573	53.0016	1147.14	109.229	8363.43	16.5918	6.22193	55.0756	0	7.1437	6.91326	6.45237	1342.09	22.8137	90.7941	2338.29	479.549	4247.5	706.074	331.836	1127.09	848.487	1743.75	1095.75	629.337	142.874	1563.78	7096.46	23.0442	1080.54	6265.02	190.575	924.533	714.37	0	1010.26	1153.13	20.2789	570.804	1303.38	164.535	0	392.212
Healthy24		Female	55	158.774	67.7499	48.8537	0	31.5705	260.63	32.0314	551.447	5.5306	2.99574	11.7525	4.3784	0.460884	17.9745	18.6658	61.7584	94.942	20.2789	112.225	157.853	828.438	38.0229	253.716	32.9532	867.844	675.195	60.6062	204.171	26.5008	298.653	544.534	14.057	206.706	309.253	7.60458	53.2321	1012.33	2.53486	111.303	192.419	0.921767	298.883	251.643	9.21767	208.089	212.007
Healthy25		Female	48	324.923	179.284	44.4753	7.1437	11.983	148.405	783.733	182.049	12.2134	1.61309	12.9047	12.4439	17.744	16.3614	5.30016	192.88	18.8962	98.3987	106.695	22.8137	500.289	86.4157	146.561	47.2406	215.694	829.821	658.833	134.348	120.06	159.696	181.127	59.2236	347.045	705.613	511.581	73.0501	207.628	1.15221	111.995	123.286	41.2491	1125.25	74.6632	86.1853	0	285.287
Healthy26		Female	37	274.917	1136.54	85.9548	52.3103	52.7712	1227.33	551.908	1636.83	0	0	32.0314	0	0	14.2874	13.1352	91.7159	10.8308	139.187	454.662	280.448	2238.28	199.563	1742.83	44.0144	240.581	221.916	402.582	269.387	664.364	565.735	1141.61	5.76105	178.823	726.122	636.48	257.634	247.034	0	572.878	452.818	77.6589	1302.69	449.592	706.074	104.16	99.7813
Healthy27		Male	65	37.7959	13.0331	60.4409	0	0	217.489	0	100.843	0	0	0	0	0	0.814567	0	12.2185	3.5841	6.51654	27.8582	3.42118	397.346	72.1706	30.139	202.664	249.909	58.9747	113.876	78.1984	27.5324	192.889	37.1443	16.1284	73.1481	470.657	29.9761	112.899	223.191	0	11.7298	103.939	1.14039	2.11787	444.917	2.28079	0	135.055
Healthy28		Male	26	3152.88	518.082	230.137	29.3151	103.836	1405.48	743.836	805.753	0.547945	4.93151	6.30137	20.274	13.6986	45.4795	62.7397	2696.71	108.493	103.836	169.041	278.356	4863.29	273.699	629.041	241.37	1506.3	5424.38	1117.26	617.26	194.795	1816.44	4492.88	126.849	584.11	2161.64	486.575	459.178	636.986	19.726	336.712	1102.47	415.89	1229.04	484.11	567.945	412.877	1477.26
Healthy29		Male	40	310.959	201.096	568.219	112.877	13.6986	234.521	1268.49	789.863	4.10959	3.56164	16.9863	20	14.2466	14.5205	38.0822	372.055	47.1233	64.1096	183.562	24.1096	16475.1	6820.27	1853.7	172.329	3106.85	4321.64	225.205	331.233	112.055	1430.96	1246.85	52.0548	838.63	12177.5	906.027	659.452	546.849	13.4247	1044.11	2294.52	26.5753	12221.1	2076.16	50.411	1138.9	1585.48
Healthy30		Male	20	1147.4	756.438	932.603	257.808	74.5205	1041.92	620.548	7174.25	7.39726	27.6712	54.5205	20.274	36.7123	108.767	172.055	486.027	72.8767	329.863	494.247	120.274	6516.16	339.726	405.205	307.671	3986.85	3973.42	998.904	1223.84	646.301	5188.49	1800.27	336.712	5222.19	8994.79	2750.14	3231.23	6040	45.7534	1370.96	2648.77	434.247	489.041	2128.49	1143.01	1489.86	1171.23
Healthy31		Female	55	1262.42	54.2878	38.6456	92.32	78.518	1757.76	447.798	3832.66	10.1215	7.36106	25.457	20.2429	9.50804	18.7094	88.6394	682.738	21.7765	104.588	112.563	31.2845	4598.82	849.282	307.324	1224.39	1950.07	1245.86	3497.42	998.344	239.541	1771.26	263.158	98.7609	421.114	3588.82	800.209	720.77	383.695	21.7765	526.929	2473.93	104.588	474.788	2401.24	234.634	3167.4	952.337
Healthy32		Male	42	839.774	492.271	128.819	23.0033	49.0737	610.355	283.094	2161.08	0	23.31	35.8852	19.0161	20.2429	17.7892	75.1442	2283.46	9.20132	58.5818	930.561	0.306711	3503.56	427.555	1929.52	724.758	1911.73	4611.09	492.578	4027.42	1394.61	4142.44	1379.89	283.708	329.714	1592.75	234.634	933.014	744.387	26.0704	403.325	3883.88	33.4315	1121.33	6137.28	52.1408	3571.65	3104.83
[truncated: 48 more columns]
