# Supplementary material for: Multiomics Integration of Serum Proteome and Autoantibody Profiles Reveals Diagnostic and Prognostic Biomarkers in Glioma
Source: Research Square preprint supplement (doi:10.21203/rs.3.rs-7933102/v1), 2025-11-05
Supplement: Supplementary file 2 [file 76d006ffecc09dfed4e265a8.xlsx]

## Sheet: Glioma VS Healthy
Summary of serum proteomic profiling and differentially expressed proteins in GBM versus healthy controls
Accession	Gene Name	Description	Coverage	# Peptides	# PSMs	# Unique Peptides	# AAs	MW [kDa]	calc. pI	Abundances Glioma1	Abundances Glioma2	Abundances Glioma3	Abundances Healthy1	Abundances Healthy2	Abundances Healthy3	Average Glioma	Average Healthy	Glioma/Healthy	P value
P02452	COL1A1	Collagen alpha-1(I) chain OS=Homo sapiens OX=9606 GN=COL1A1 PE=1 SV=5	22.6093	32	157	31	1464	138.857	5.8	138.7	211.2	181.7	22.5	22.6	23.4	177.2	22.8333	7.76058	0.00184099
P08123	COL1A2	Collagen alpha-2(I) chain OS=Homo sapiens OX=9606 GN=COL1A2 PE=1 SV=7	8.12592	12	39	12	1366	129.235	8.95	114	208.5	171.9	35.4	32.5	37.7	164.8	35.2	4.68182	0.00928073
P16104	H2AFX	Histone H2AX OS=Homo sapiens OX=9606 GN=H2AFX PE=1 SV=2	4.8951	1	1	1	143	15.135	10.74	143.8	164.2	164.6	44.2	36.4	46.9	157.533	42.5	3.70667	0.000108481
P80511	S100A12	Protein S100-A12 OS=Homo sapiens OX=9606 GN=S100A12 PE=1 SV=2	9.78261	2	4	2	92	10.569	6.25	170.8	153.9	146.8	35.3	53.8	39.4	157.167	42.8333	3.66926	0.000227272
P02458	COL2A1	Collagen alpha-1(II) chain OS=Homo sapiens OX=9606 GN=COL2A1 PE=1 SV=3	2.62273	4	7	3	1487	141.699	6.92	140.3	159.5	165.4	49.7	40.8	44.4	155.067	44.9667	3.44848	0.000161995
P10153	RNASE2	Non-secretory ribonuclease OS=Homo sapiens OX=9606 GN=RNASE2 PE=1 SV=2	19.8758	2	3	2	161	18.342	8.73	134.3	174.7	155.5	44.5	49.6	41.3	154.833	45.1333	3.43058	0.000773187
Q86Y22	COL23A1	Collagen alpha-1(XXIII) chain OS=Homo sapiens OX=9606 GN=COL23A1 PE=1 SV=1	1.66667	1	2	1	540	51.912	7.25	124.8	190.6	143.3	68.8	25.7	46.8	152.9	47.1	3.24628	0.0103503
Q9NRX4	PHPT1	14 kDa phosphohistidine phosphatase OS=Homo sapiens OX=9606 GN=PHPT1 PE=1 SV=1	7.2	1	1	1	125	13.824	6.07	174.4	141.4	137.8	47.3	49.5	49.6	151.2	48.8	3.09836	0.000930303
P25815	S100P	Protein S100-P OS=Homo sapiens OX=9606 GN=S100P PE=1 SV=2	48.4211	4	4	4	95	10.393	4.88	173.7	100.2	178.5	47.9	55.5	44.1	150.8	49.1667	3.06712	0.0164493
Q9BPU6	DPYSL5	Dihydropyrimidinase-related protein 5 OS=Homo sapiens OX=9606 GN=DPYSL5 PE=1 SV=1	1.24113	1	1	1	564	61.382	7.2	127.3	155.3	168.4	46.6	42	60.4	150.333	49.6667	3.02685	0.00164405
P12107	COL11A1	Collagen alpha-1(XI) chain OS=Homo sapiens OX=9606 GN=COL11A1 PE=1 SV=4	1.3289	3	5	1	1806	180.954	5.17	116	188.4	145.8	50.2	49.2	50.4	150.067	49.9333	3.00534	0.00886904
Q04917	YWHAH	14-3-3 protein eta OS=Homo sapiens OX=9606 GN=YWHAH PE=1 SV=4	27.2358	6	8	3	246	28.201	4.84	167.7	98.3	173	51.4	55.3	54.3	146.333	53.6667	2.72671	0.0183638
Q9BZH6	WDR11	WD repeat-containing protein 11 OS=Homo sapiens OX=9606 GN=WDR11 PE=1 SV=1	0.653595	1	1	1	1224	136.598	6.92	182.3	102.7	152.5	55.3	56.4	50.8	145.833	54.1667	2.69231	0.0169997
P62805	HIST1H4A	Histone H4 OS=Homo sapiens OX=9606 GN=HIST1H4A PE=1 SV=2	30.0971	4	5	4	103	11.36	11.36	125.7	146.9	157.8	63	51.3	55.2	143.467	56.5	2.53923	0.000974409
P05997	COL5A2	Collagen alpha-2(V) chain OS=Homo sapiens OX=9606 GN=COL5A2 PE=1 SV=3	0.6004	1	1	1	1499	144.821	6.46	140.2	151.8	138	54.9	53.3	61.8	143.333	56.6667	2.52941	6.56675e-05
O43707	ACTN4	Alpha-actinin-4 OS=Homo sapiens OX=9606 GN=ACTN4 PE=1 SV=2	13.7212	11	13	3	911	104.788	5.44	149.7	101.5	173.5	57.6	60.2	57.5	141.567	58.4333	2.4227	0.0172199
P41218	MNDA	Myeloid cell nuclear differentiation antigen OS=Homo sapiens OX=9606 GN=MNDA PE=1 SV=1	4.6683	2	2	2	407	45.807	9.76	154.4	106.5	162.7	56.8	61	58.5	141.2	58.7667	2.40272	0.00934188
P29350	PTPN6	Tyrosine-protein phosphatase non-receptor type 6 OS=Homo sapiens OX=9606 GN=PTPN6 PE=1 SV=1	1.51261	1	1	1	595	67.519	7.78	157.7	91.2	174.5	57.2	65.1	54.3	141.133	58.8667	2.39751	0.0326239
P59998	ARPC4	Actin-related protein 2/3 complex subunit 4 OS=Homo sapiens OX=9606 GN=ARPC4 PE=1 SV=3	20.2381	4	4	4	168	19.654	8.43	161	85.7	175.6	59.7	58.9	59.2	140.767	59.2667	2.37514	0.0429909
P05109	S100A8	Protein S100-A8 OS=Homo sapiens OX=9606 GN=S100A8 PE=1 SV=1	65.5914	9	32	9	93	10.828	7.03	184.2	93	139.8	60.5	69.8	52.6	139	60.9667	2.27993	0.043582
P02655	APOC2	Apolipoprotein C-II OS=Homo sapiens OX=9606 GN=APOC2 PE=1 SV=1	52.4752	5	31	5	101	11.277	4.72	111.2	162.2	142.8	58.6	79.5	45.7	138.733	61.2667	2.26442	0.0122046
Q99497	PARK7	Protein/nucleic acid deglycase DJ-1 OS=Homo sapiens OX=9606 GN=PARK7 PE=1 SV=2	37.5661	6	7	6	189	19.878	6.79	126.8	136	152.4	54.5	63.9	66.4	138.4	61.6	2.24675	0.000764556
Q01518	CAP1	Adenylyl cyclase-associated protein 1 OS=Homo sapiens OX=9606 GN=CAP1 PE=1 SV=5	12.4211	6	8	6	475	51.869	8.06	130.2	110.8	173.5	51.4	69.6	64.4	138.167	61.8	2.23571	0.0167428
P0DJI8	SAA1	Serum amyloid A-1 protein OS=Homo sapiens OX=9606 GN=SAA1 PE=1 SV=1	64.7541	6	9	6	122	13.524	6.79	165.3	85.2	163.5	68.1	59.1	58.7	138	61.9667	2.227	0.0459183
P33241	LSP1	Lymphocyte-specific protein 1 OS=Homo sapiens OX=9606 GN=LSP1 PE=1 SV=1	5.30973	1	1	1	339	37.169	4.74	133	140.1	139.4	64.8	63.1	59.6	137.5	62.5	2.2	1.04233e-05
P08833	IGFBP1	Insulin-like growth factor-binding protein 1 OS=Homo sapiens OX=9606 GN=IGFBP1 PE=1 SV=1	16.2162	4	5	4	259	27.885	5.19	107	182.1	122.7	64.8	60.2	63.3	137.267	62.7667	2.18694	0.0313221
P61088	UBE2N	Ubiquitin-conjugating enzyme E2 N OS=Homo sapiens OX=9606 GN=UBE2N PE=1 SV=1	18.4211	3	3	3	152	17.127	6.57	142.9	122.5	145.7	50.1	67.6	71.3	137.033	63	2.17513	0.00165051
P31949	S100A11	Protein S100-A11 OS=Homo sapiens OX=9606 GN=S100A11 PE=1 SV=2	34.2857	3	3	3	105	11.733	7.12	168.6	97.3	143.4	60.3	68.7	61.7	136.433	63.5667	2.1463	0.0257272
P63241	EIF5A	Eukaryotic translation initiation factor 5A-1 OS=Homo sapiens OX=9606 GN=EIF5A PE=1 SV=2	12.987	2	2	2	154	16.821	5.24	147	114	147.6	58.5	68.1	64.8	136.2	63.8	2.1348	0.00320389
P31146	CORO1A	Coronin-1A OS=Homo sapiens OX=9606 GN=CORO1A PE=1 SV=4	24.295	9	13	9	461	50.994	6.68	157.4	95.7	155.3	65.7	65.9	60	136.133	63.8667	2.13152	0.0236543
P27169	PON1	Serum paraoxonase/arylesterase 1 OS=Homo sapiens OX=9606 GN=PON1 PE=1 SV=3	35.493	10	36	8	355	39.706	5.22	139.1	91.7	176.3	64.5	67	61.5	135.7	64.3333	2.10933	0.0437195
Q9Y275	TNFSF13B	Tumor necrosis factor ligand superfamily member 13B OS=Homo sapiens OX=9606 GN=TNFSF13B PE=1 SV=1	2.45614	1	1	1	285	31.203	6.25	133	165.5	107.9	57.5	67.9	68.1	135.467	64.5	2.10026	0.0140826
P80723	BASP1	Brain acid soluble protein 1 OS=Homo sapiens OX=9606 GN=BASP1 PE=1 SV=2	12.7753	2	2	2	227	22.68	4.63	114.8	154.5	136.5	62.8	65.4	66	135.267	64.7333	2.0896	0.00360324
O75083	WDR1	WD repeat-containing protein 1 OS=Homo sapiens OX=9606 GN=WDR1 PE=1 SV=4	16.9967	9	9	9	606	66.152	6.65	137.1	94.5	173.6	63.5	67.4	64	135.067	64.9667	2.07901	0.037566
P0DP25	CALM3	Calmodulin-3 OS=Homo sapiens OX=9606 GN=CALM3 PE=1 SV=1	27.5168	3	6	3	149	16.827	4.22	125.8	122.7	156.4	61.8	67.4	65.8	134.967	65	2.07641	0.00300927
P35542	SAA4	Serum amyloid A-4 protein OS=Homo sapiens OX=9606 GN=SAA4 PE=1 SV=2	27.6923	4	17	4	130	14.737	9.07	105.7	154.2	144.6	68.9	67.9	58.7	134.833	65.1667	2.06905	0.0101096
Q9HCB6	SPON1	Spondin-1 OS=Homo sapiens OX=9606 GN=SPON1 PE=1 SV=2	2.10657	2	2	2	807	90.914	6.11	111.3	171	120.9	67.5	68.1	61.2	134.4	65.6	2.04878	0.0209996
P31946	YWHAB	14-3-3 protein beta/alpha OS=Homo sapiens OX=9606 GN=YWHAB PE=1 SV=3	38.6179	9	12	3	246	28.065	4.83	147.8	103.5	150	63	68.9	66.9	133.767	66.2667	2.01861	0.0114436
P00441	SOD1	Superoxide dismutase [Cu-Zn] OS=Homo sapiens OX=9606 GN=SOD1 PE=1 SV=2	44.1558	8	12	8	154	15.926	6.13	169.1	114.5	117.3	58.9	76.1	64.1	133.633	66.3667	2.01356	0.0219188
P06744	GPI	Glucose-6-phosphate isomerase OS=Homo sapiens OX=9606 GN=GPI PE=1 SV=4	12.0072	6	9	6	558	63.107	8.32	164.1	97.1	139.6	68.6	63.8	66.8	133.6	66.4	2.01205	0.0266665
O00299	CLIC1	Chloride intracellular channel protein 1 OS=Homo sapiens OX=9606 GN=CLIC1 PE=1 SV=4	36.9295	8	10	8	241	26.906	5.17	132.1	95.8	172.6	64.5	67.8	67.3	133.5	66.5333	2.00651	0.0393241
Q9P2E9	RRBP1	Ribosome-binding protein 1 OS=Homo sapiens OX=9606 GN=RRBP1 PE=1 SV=5	12.0567	1	1	1	1410	152.365	8.6	138.3	139.4	122.6	90.6	46.4	62.7	133.433	66.5667	2.00451	0.00879866
P02538	KRT6A	Keratin, type II cytoskeletal 6A OS=Homo sapiens OX=9606 GN=KRT6A PE=1 SV=3	30.4965	16	21	7	564	60.008	8	90.3	159.8	150.1	75.4	62.6	61.8	133.4	66.6	2.003	0.0394482
P07900	HSP90AA1	Heat shock protein HSP 90-alpha OS=Homo sapiens OX=9606 GN=HSP90AA1 PE=1 SV=5	7.78689	5	7	5	732	84.607	5.02	164.2	90.1	145.6	66.8	69.9	63.4	133.3	66.7	1.9985	0.040671
O75368	SH3BGRL	SH3 domain-binding glutamic acid-rich-like protein OS=Homo sapiens OX=9606 GN=SH3BGRL PE=1 SV=1	35.0877	3	4	3	114	12.766	5.25	117.2	144	137.1	54.4	76.7	70.6	132.767	67.2333	1.97471	0.00327881
O75347	TBCA	Tubulin-specific chaperone A OS=Homo sapiens OX=9606 GN=TBCA PE=1 SV=3	20.3704	2	2	2	108	12.847	5.29	140.3	116.4	140.2	60.6	72.6	69.9	132.3	67.7	1.95421	0.00178781
P52566	ARHGDIB	Rho GDP-dissociation inhibitor 2 OS=Homo sapiens OX=9606 GN=ARHGDIB PE=1 SV=3	33.3333	5	7	5	201	22.974	5.21	144.1	99.5	153.3	58.9	73.6	70.6	132.3	67.7	1.95421	0.0198777
P23141	CES1	Liver carboxylesterase 1 OS=Homo sapiens OX=9606 GN=CES1 PE=1 SV=2	28.2187	12	17	12	567	62.481	6.6	172.1	94.9	129.2	70.5	67.8	65.4	132.067	67.9	1.94502	0.0456015
P04264	KRT1	Keratin, type II cytoskeletal 1 OS=Homo sapiens OX=9606 GN=KRT1 PE=1 SV=6	38.8199	25	48	22	644	65.999	8.12	115	149	132	74.9	72.6	56.6	132	68.0333	1.94023	0.00492156
P35908	KRT2	Keratin, type II cytoskeletal 2 epidermal OS=Homo sapiens OX=9606 GN=KRT2 PE=1 SV=2	48.9828	30	48	22	639	65.393	8	131	149.8	114.6	76.7	71.9	56.1	131.8	68.2333	1.93161	0.005958
P68431	HIST1H3A	Histone H3.1 OS=Homo sapiens OX=9606 GN=HIST1H3A PE=1 SV=2	5.14706	1	1	1	136	15.394	11.12	113.1	142.9	139.2	76.3	62.7	65.7	131.733	68.2333	1.93063	0.0034455
P00915	CA1	Carbonic anhydrase 1 OS=Homo sapiens OX=9606 GN=CA1 PE=1 SV=2	60.1533	12	31	12	261	28.852	7.12	153.3	123.5	117.9	66.6	74.6	64.2	131.567	68.4667	1.92162	0.00525229
P00558	PGK1	Phosphoglycerate kinase 1 OS=Homo sapiens OX=9606 GN=PGK1 PE=1 SV=3	32.3741	12	16	12	417	44.586	8.1	160.7	98.6	134.5	66.3	74.9	65	131.267	68.7333	1.9098	0.0266925
Q08830	FGL1	Fibrinogen-like protein 1 OS=Homo sapiens OX=9606 GN=FGL1 PE=1 SV=3	8.33333	3	3	3	312	36.357	5.87	124.8	129.8	138.9	77.3	62.5	66.7	131.167	68.8333	1.90557	0.000495924
P30740	SERPINB1	Leukocyte elastase inhibitor OS=Homo sapiens OX=9606 GN=SERPINB1 PE=1 SV=1	22.1636	8	10	8	379	42.715	6.28	153.1	96.2	144.1	67.4	72.3	67	131.133	68.9	1.90324	0.0247185
P0DMN0	SULT1A4	Sulfotransferase 1A4 OS=Homo sapiens OX=9606 GN=SULT1A4 PE=1 SV=1	2.37288	1	1	1	295	34.174	6.01	166.3	98.8	126.3	77	72	59.6	130.467	69.5333	1.87632	0.0396897
Q08ET2	SIGLEC14	Sialic acid-binding Ig-like lectin 14 OS=Homo sapiens OX=9606 GN=SIGLEC14 PE=1 SV=1	2.0202	1	1	1	396	43.942	7.96	109.9	162.5	117.8	82	73.9	53.9	130.067	69.9333	1.85987	0.0307535
P30044	PRDX5	Peroxiredoxin-5, mitochondrial OS=Homo sapiens OX=9606 GN=PRDX5 PE=1 SV=4	16.8224	3	4	3	214	22.073	8.7	147.9	93.3	148.7	63.7	76.6	69.8	129.967	70.0333	1.85578	0.0327955
P00918	CA2	Carbonic anhydrase 2 OS=Homo sapiens OX=9606 GN=CA2 PE=1 SV=2	48.8462	11	18	11	260	29.228	7.4	153.5	116.8	118.5	63.4	80	67.9	129.6	70.4333	1.84004	0.01026
P32119	PRDX2	Peroxiredoxin-2 OS=Homo sapiens OX=9606 GN=PRDX2 PE=1 SV=5	36.3636	9	18	8	198	21.878	5.97	152.3	111.5	124.7	64.7	82.8	64	129.5	70.5	1.83688	0.0119751
P55072	VCP	Transitional endoplasmic reticulum ATPase OS=Homo sapiens OX=9606 GN=VCP PE=1 SV=4	3.72208	3	4	3	806	89.266	5.26	121.4	113	152.4	65.9	68.6	78.6	128.933	71.0333	1.81511	0.0100354
O15145	ARPC3	Actin-related protein 2/3 complex subunit 3 OS=Homo sapiens OX=9606 GN=ARPC3 PE=1 SV=3	13.4831	2	2	2	178	20.533	8.59	141.7	92.6	151.5	73.1	69.6	71.6	128.6	71.4333	1.80028	0.0350982
Q96A08	HIST1H2BA	Histone H2B type 1-A OS=Homo sapiens OX=9606 GN=HIST1H2BA PE=1 SV=3	13.3858	2	2	2	127	14.159	10.32	123.9	131.2	130.6	69	71.6	73.8	128.567	71.4667	1.79897	3.04367e-05
P52907	CAPZA1	F-actin-capping protein subunit alpha-1 OS=Homo sapiens OX=9606 GN=CAPZA1 PE=1 SV=3	5.59441	1	1	1	286	32.902	5.69	128.9	116	140.8	73.4	66.7	74.3	128.567	71.4667	1.79897	0.00163975
P30041	PRDX6	Peroxiredoxin-6 OS=Homo sapiens OX=9606 GN=PRDX6 PE=1 SV=3	51.3393	10	10	10	224	25.019	6.38	147	107.6	129.3	68.7	84.3	63	127.967	72	1.77731	0.0127645
Q96FE7	PIK3IP1	Phosphoinositide-3-kinase-interacting protein 1 OS=Homo sapiens OX=9606 GN=PIK3IP1 PE=1 SV=2	4.18251	1	1	1	263	28.23	5.01	127.4	149.1	107.1	69	78.6	68.9	127.867	72.1667	1.77182	0.0113369
Q9NQS3	NECTIN3	Nectin-3 OS=Homo sapiens OX=9606 GN=NECTIN3 PE=1 SV=1	1.45719	1	1	1	549	60.964	6.19	149.6	111.2	122.2	78.5	70	68.5	127.667	72.3333	1.76498	0.00947757
P08670	VIM	Vimentin OS=Homo sapiens OX=9606 GN=VIM PE=1 SV=4	21.6738	10	11	10	466	53.619	5.12	160.7	102.3	119.2	75.9	72	69.9	127.4	72.6	1.75482	0.034767
P15531	NME1	Nucleoside diphosphate kinase A OS=Homo sapiens OX=9606 GN=NME1 PE=1 SV=1	29.6053	4	4	4	152	17.138	6.19	148.9	98.8	133.7	73.6	71.9	73.1	127.133	72.8667	1.74474	0.0216379
P60174	TPI1	Triosephosphate isomerase OS=Homo sapiens OX=9606 GN=TPI1 PE=1 SV=3	34.6154	7	11	7	286	30.772	5.92	144.7	106.5	128.7	72.5	73.6	74	126.633	73.3667	1.72603	0.00861421
P50454	SERPINH1	Serpin H1 OS=Homo sapiens OX=9606 GN=SERPINH1 PE=1 SV=2	3.34928	1	1	1	418	46.411	8.69	132.8	116.9	129.2	94.4	63.5	63.1	126.3	73.6667	1.71448	0.00999521
P01040	CSTA	Cystatin-A OS=Homo sapiens OX=9606 GN=CSTA PE=1 SV=1	15.3061	2	2	2	98	11	5.5	146.5	101.7	129.1	81.6	75.8	65.2	125.767	74.2	1.69497	0.0206353
P13647	KRT5	Keratin, type II cytoskeletal 5 OS=Homo sapiens OX=9606 GN=KRT5 PE=1 SV=3	35.0847	20	25	12	590	62.34	7.74	108.4	143.8	124.9	84	71	67.9	125.7	74.3	1.69179	0.0106012
Q01469	FABP5	Fatty acid-binding protein 5 OS=Homo sapiens OX=9606 GN=FABP5 PE=1 SV=3	17.037	2	2	2	135	15.155	7.01	109.9	139.4	127.8	68.8	75.1	79	125.7	74.3	1.69179	0.00480127
P35527	KRT9	Keratin, type I cytoskeletal 9 OS=Homo sapiens OX=9606 GN=KRT9 PE=1 SV=3	40.7705	21	32	20	623	62.027	5.24	94.5	143.4	138.7	76.8	82.2	64.3	125.533	74.4333	1.68652	0.036019
P52565	ARHGDIA	Rho GDP-dissociation inhibitor 1 OS=Homo sapiens OX=9606 GN=ARHGDIA PE=1 SV=3	11.2745	2	2	2	204	23.193	5.11	135	101.3	139.9	67.3	72.7	83.7	125.4	74.5667	1.68172	0.0176434
P13645	KRT10	Keratin, type I cytoskeletal 10 OS=Homo sapiens OX=9606 GN=KRT10 PE=1 SV=6	57.1918	31	65	24	584	58.792	5.21	120.9	140.5	114	91.1	73.3	60.1	125.133	74.8333	1.67216	0.013735
P37837	TALDO1	Transaldolase OS=Homo sapiens OX=9606 GN=TALDO1 PE=1 SV=2	21.0682	7	11	7	337	37.516	6.81	151.9	94.1	129.4	76.7	73	74.9	125.133	74.8667	1.67142	0.0406472
P06753	TPM3	Tropomyosin alpha-3 chain OS=Homo sapiens OX=9606 GN=TPM3 PE=1 SV=2	23.1579	9	11	3	285	32.93	4.72	116.8	108.3	148.4	72.6	77.1	76.7	124.5	75.4667	1.64973	0.0162417
P62258	YWHAE	14-3-3 protein epsilon OS=Homo sapiens OX=9606 GN=YWHAE PE=1 SV=1	25.4902	6	9	4	255	29.155	4.74	144.4	103	126.1	76.2	78.4	71.9	124.5	75.5	1.64901	0.0156054
P14174	MIF	Macrophage migration inhibitory factor OS=Homo sapiens OX=9606 GN=MIF PE=1 SV=4	26.087	2	2	2	115	12.468	7.88	143.8	99.9	129.7	62.4	95.9	68.2	124.467	75.5	1.64857	0.0416944
P48506	GCLC	Glutamate--cysteine ligase catalytic subunit OS=Homo sapiens OX=9606 GN=GCLC PE=1 SV=2	2.51177	2	2	2	637	72.719	6.09	150.6	110.7	111.6	74.6	79.9	72.6	124.3	75.7	1.64201	0.021859
Q99436	PSMB7	Proteasome subunit beta type-7 OS=Homo sapiens OX=9606 GN=PSMB7 PE=1 SV=1	3.2491	1	1	1	277	29.946	7.68	153.1	103.5	116.2	76.6	73.8	76.8	124.267	75.7333	1.64085	0.0312061
P13667	PDIA4	Protein disulfide-isomerase A4 OS=Homo sapiens OX=9606 GN=PDIA4 PE=1 SV=2	10.5426	5	5	5	645	72.887	5.07	157.1	107.8	107.4	81	69.7	77.1	124.1	75.9333	1.63433	0.045838
P06703	S100A6	Protein S100-A6 OS=Homo sapiens OX=9606 GN=S100A6 PE=1 SV=1	24.4444	3	3	3	90	10.173	5.48	145.6	102.2	124.1	74.9	85	68.2	123.967	76.0333	1.63043	0.0234861
Q68BL7	OLFML2A	Olfactomedin-like protein 2A OS=Homo sapiens OX=9606 GN=OLFML2A PE=2 SV=1	1.38037	1	1	1	652	73.009	7.81	128.9	125.6	117.3	77.6	71.7	78.9	123.933	76.0667	1.62927	0.000307954
P07737	PFN1	Profilin-1 OS=Homo sapiens OX=9606 GN=PFN1 PE=1 SV=2	87.1429	9	22	9	140	15.045	8.27	127.6	95.3	148.8	64.8	79.6	83.9	123.9	76.1	1.62812	0.0449986
P47756	CAPZB	F-actin-capping protein subunit beta OS=Homo sapiens OX=9606 GN=CAPZB PE=1 SV=4	11.5523	3	3	3	277	31.331	5.59	135.3	92.9	143.4	78.9	73.9	75.6	123.867	76.1333	1.62697	0.0385903
P04040	CAT	Catalase OS=Homo sapiens OX=9606 GN=CAT PE=1 SV=3	46.4896	22	29	22	527	59.719	7.39	148.5	105.4	117.5	78.2	77.6	72.9	123.8	76.2333	1.62396	0.0212977
O95445	APOM	Apolipoprotein M OS=Homo sapiens OX=9606 GN=APOM PE=1 SV=2	64.3617	10	21	10	188	21.239	6.01	103	123.6	144.5	74.6	90.6	63.7	123.7	76.3	1.62123	0.0295375
P13639	EEF2	Elongation factor 2 OS=Homo sapiens OX=9606 GN=EEF2 PE=1 SV=4	5.24476	3	3	3	858	95.277	6.83	141.8	114.2	114.3	77.9	76.2	75.7	123.433	76.6	1.6114	0.00704894
Q9HDC9	APMAP	Adipocyte plasma membrane-associated protein OS=Homo sapiens OX=9606 GN=APMAP PE=1 SV=2	17.5481	5	5	5	416	46.451	6.16	105.9	146.6	116.8	80.6	80	70.1	123.1	76.9	1.60078	0.0216272
P62942	FKBP1A	Peptidyl-prolyl cis-trans isomerase FKBP1A OS=Homo sapiens OX=9606 GN=FKBP1A PE=1 SV=2	25	2	2	2	108	11.943	8.16	112.8	124.4	132.1	72.2	83.3	75.2	123.1	76.9	1.60078	0.00208885
Q0ZGT2	NEXN	Nexilin OS=Homo sapiens OX=9606 GN=NEXN PE=1 SV=1	1.62963	1	1	1	675	80.609	5.33	112.6	135.7	120.9	66.4	77.9	86.5	123.067	76.9333	1.59965	0.00663968
P22061	PCMT1	Protein-L-isoaspartate(D-aspartate) O-methyltransferase OS=Homo sapiens OX=9606 GN=PCMT1 PE=1 SV=4	11.8943	2	3	2	227	24.621	7.21	122.7	112.7	130.8	66.5	86.5	80.8	122.067	77.9333	1.5663	0.00509141
Q9NUQ9	FAM49B	Protein FAM49B OS=Homo sapiens OX=9606 GN=FAM49B PE=1 SV=1	3.08642	1	1	1	324	36.725	6.06	109.6	129.4	126.8	79.2	75.8	79.2	121.933	78.0667	1.56191	0.00225575
P62979	RPS27A	Ubiquitin-40S ribosomal protein S27a OS=Homo sapiens OX=9606 GN=RPS27A PE=1 SV=2	27.5641	4	6	4	156	17.953	9.64	147.2	110	108.6	70.3	81.7	82.2	121.933	78.0667	1.56191	0.0294532
P00491	PNP	Purine nucleoside phosphorylase OS=Homo sapiens OX=9606 GN=PNP PE=1 SV=2	7.26644	2	2	2	289	32.097	6.95	137.5	92.7	135.2	80.4	77.1	77.2	121.8	78.2333	1.55688	0.0406216
P55056	APOC4	Apolipoprotein C-IV OS=Homo sapiens OX=9606 GN=APOC4 PE=1 SV=1	45.6693	8	19	8	127	14.543	8.92	107.3	144.1	113.1	84.4	81.8	69.4	121.5	78.5333	1.54711	0.0252125
P07108	DBI	Acyl-CoA-binding protein OS=Homo sapiens OX=9606 GN=DBI PE=1 SV=2	8.04598	1	1	1	87	10.038	6.57	126.1	101	137.2	74.7	81.9	79.1	121.433	78.5667	1.54561	0.0171183
P26447	S100A4	Protein S100-A4 OS=Homo sapiens OX=9606 GN=S100A4 PE=1 SV=1	26.7327	3	4	3	101	11.721	6.11	141.2	93.4	129.6	74.8	87.3	73.7	121.4	78.6	1.54453	0.0466063
Q8NCC3	PLA2G15	Group XV phospholipase A2 OS=Homo sapiens OX=9606 GN=PLA2G15 PE=1 SV=2	2.18447	1	1	1	412	46.628	6.73	115.5	135.1	113.5	90.4	66.7	78.8	121.367	78.6333	1.54345	0.0116856
P10599	TXN	Thioredoxin OS=Homo sapiens OX=9606 GN=TXN PE=1 SV=3	40	5	8	5	105	11.73	4.92	131.3	111	121.4	71.5	84.8	79.9	121.233	78.7333	1.5398	0.00377752
P09382	LGALS1	Galectin-1 OS=Homo sapiens OX=9606 GN=LGALS1 PE=1 SV=2	17.7778	2	3	2	135	14.706	5.5	100.8	147.4	114.7	76.2	76.9	84	120.967	79.0333	1.53058	0.0404295
Q9ULZ3	PYCARD	Apoptosis-associated speck-like protein containing a CARD OS=Homo sapiens OX=9606 GN=PYCARD PE=1 SV=2	7.17949	1	1	1	195	21.613	6.34	136.3	98.3	128	95.1	66.3	75.9	120.867	79.1	1.52802	0.0432866
P61978	HNRNPK	Heterogeneous nuclear ribonucleoprotein K OS=Homo sapiens OX=9606 GN=HNRNPK PE=1 SV=1	2.59179	1	1	1	463	50.944	5.54	131.5	107.5	123	97.7	79.9	60.4	120.667	79.3333	1.52101	0.0324628
P35754	GLRX	Glutaredoxin-1 OS=Homo sapiens OX=9606 GN=GLRX PE=1 SV=2	10.3774	1	1	1	106	11.768	8.09	126.6	121.7	112.3	91.6	77.4	70.3	120.2	79.7667	1.5069	0.00582904
P02461	COL3A1	Collagen alpha-1(III) chain OS=Homo sapiens OX=9606 GN=COL3A1 PE=1 SV=4	1.29604	3	5	3	1466	138.479	6.61	97.6	143.4	119.3	77.5	76.4	85.7	120.1	79.8667	1.50376	0.0411645
Q8NI99	ANGPTL6	Angiopoietin-related protein 6 OS=Homo sapiens OX=9606 GN=ANGPTL6 PE=1 SV=1	2.76596	1	1	1	470	51.662	8.53	99.1	141	118.7	79.4	77.7	84.2	119.6	80.4333	1.48695	0.0330629
P52790	HK3	Hexokinase-3 OS=Homo sapiens OX=9606 GN=HK3 PE=1 SV=2	4.11701	3	3	3	923	98.962	5.4	130.7	104.9	120.7	84.6	76.8	82.3	118.767	81.2333	1.46204	0.00880106
P02649	APOE	Apolipoprotein E OS=Homo sapiens OX=9606 GN=APOE PE=1 SV=1	76.0252	27	119	27	317	36.132	5.73	112.4	119.1	124.3	92	73.2	79.1	118.6	81.4333	1.45641	0.00471404
P27797	CALR	Calreticulin OS=Homo sapiens OX=9606 GN=CALR PE=1 SV=1	28.2974	10	13	10	417	48.112	4.44	142.3	101.2	112.3	81.3	82.9	80.1	118.6	81.4333	1.45641	0.0391208
Q13404	UBE2V1	Ubiquitin-conjugating enzyme E2 variant 1 OS=Homo sapiens OX=9606 GN=UBE2V1 PE=1 SV=2	6.80272	1	1	1	147	16.484	7.93	122.1	121	111.4	83.5	79.1	82.9	118.167	81.8333	1.44399	0.000582317
P60900	PSMA6	Proteasome subunit alpha type-6 OS=Homo sapiens OX=9606 GN=PSMA6 PE=1 SV=1	17.8862	4	5	4	246	27.382	6.76	137.7	118.5	98	85.6	82	78.1	118.067	81.9	1.4416	0.0362078
P50552	VASP	Vasodilator-stimulated phosphoprotein OS=Homo sapiens OX=9606 GN=VASP PE=1 SV=3	15.7895	5	5	5	380	39.805	8.94	113	103	138.1	72.2	81.4	92.3	118.033	81.9667	1.44002	0.0392134
P62937	PPIA	Peptidyl-prolyl cis-trans isomerase A OS=Homo sapiens OX=9606 GN=PPIA PE=1 SV=2	55.7576	9	16	9	165	18.001	7.81	125.1	104.5	123.7	67.4	89	90.4	117.767	82.2667	1.43152	0.0236403
P81605	DCD	Dermcidin OS=Homo sapiens OX=9606 GN=DCD PE=1 SV=2	26.3636	3	4	3	110	11.277	6.54	106.3	126.6	117.3	93.3	67.8	88.6	116.733	83.2333	1.40248	0.0267191
P02533	KRT14	Keratin, type I cytoskeletal 14 OS=Homo sapiens OX=9606 GN=KRT14 PE=1 SV=4	20.7627	10	12	3	472	51.529	5.16	101	130.8	117.8	91.2	75.9	83.3	116.533	83.4667	1.39617	0.0269768
P28676	GCA	Grancalcin OS=Homo sapiens OX=9606 GN=GCA PE=1 SV=2	5.52995	1	1	1	217	23.994	5.21	109.5	122.2	116.7	102.7	81.6	67.2	116.133	83.8333	1.38529	0.0419206
P54727	RAD23B	UV excision repair protein RAD23 homolog B OS=Homo sapiens OX=9606 GN=RAD23B PE=1 SV=1	5.13447	2	2	2	409	43.145	4.84	115.5	122.4	110.4	69	92.7	90	116.1	83.9	1.38379	0.0175549
P25786	PSMA1	Proteasome subunit alpha type-1 OS=Homo sapiens OX=9606 GN=PSMA1 PE=1 SV=1	12.5475	3	3	3	263	29.537	6.61	136.5	105.2	106	90.6	81.5	80.2	115.9	84.1	1.37812	0.0423116
Q9NZD4	AHSP	Alpha-hemoglobin-stabilizing protein OS=Homo sapiens OX=9606 GN=AHSP PE=1 SV=1	22.549	2	2	2	102	11.833	5	135.1	100.9	110	83.6	85.4	85	115.333	84.6667	1.3622	0.0401598
P30050	RPL12	60S ribosomal protein L12 OS=Homo sapiens OX=9606 GN=RPL12 PE=1 SV=1	9.69697	1	1	1	165	17.808	9.42	109.9	112.9	123.2	89.7	88.6	75.7	115.333	84.6667	1.3622	0.00707381
P13489	RNH1	Ribonuclease inhibitor OS=Homo sapiens OX=9606 GN=RNH1 PE=1 SV=2	8.67679	4	4	4	461	49.941	4.82	130.9	94.6	119.4	82.7	85.6	86.8	114.967	85.0333	1.35202	0.0499808
Q15084	PDIA6	Protein disulfide-isomerase A6 OS=Homo sapiens OX=9606 GN=PDIA6 PE=1 SV=1	8.40909	3	3	3	440	48.091	5.08	123.1	96.9	124.2	83	82	90.8	114.733	85.2667	1.34558	0.0344178
P40121	CAPG	Macrophage-capping protein OS=Homo sapiens OX=9606 GN=CAPG PE=1 SV=2	5.74713	2	2	2	348	38.474	6.19	123.1	99.3	119.5	85.8	89.9	82.3	113.967	86	1.32519	0.0223549
Q9UBR2	CTSZ	Cathepsin Z OS=Homo sapiens OX=9606 GN=CTSZ PE=1 SV=1	2.31023	1	1	1	303	33.846	7.11	116.8	114.1	107.4	85.1	91.4	85.3	112.767	87.2667	1.29221	0.00183787
P04114	APOB	Apolipoprotein B-100 OS=Homo sapiens OX=9606 GN=APOB PE=1 SV=2	62.5466	269	2499	269	4563	515.283	7.05	107.7	112.6	117.2	89.3	99.2	73.9	112.5	87.4667	1.2862	0.0333166
P50502	ST13	Hsc70-interacting protein OS=Homo sapiens OX=9606 GN=ST13 PE=1 SV=2	6.50407	2	2	2	369	41.305	5.27	108.6	124	103.1	90.3	90.6	83.4	111.9	88.1	1.27015	0.0235514
P34932	HSPA4	Heat shock 70 kDa protein 4 OS=Homo sapiens OX=9606 GN=HSPA4 PE=1 SV=4	5.47619	4	4	4	840	94.271	5.19	113.8	114.4	104.3	92.5	85.3	89.7	110.833	89.1667	1.24299	0.00506644
Q96NZ9	PRAP1	Proline-rich acidic protein 1 OS=Homo sapiens OX=9606 GN=PRAP1 PE=1 SV=2	11.9205	2	2	2	151	17.197	5.36	107.9	121.1	102.3	91.8	92.7	84.2	110.433	89.5667	1.23297	0.0280278
Q9UJJ9	GNPTG	N-acetylglucosamine-1-phosphotransferase subunit gamma OS=Homo sapiens OX=9606 GN=GNPTG PE=1 SV=1	15.4098	4	5	4	305	33.952	6.95	98.2	122.4	110.2	90.3	92.3	86.6	110.267	89.7333	1.22883	0.0459902
P23284	PPIB	Peptidyl-prolyl cis-trans isomerase B OS=Homo sapiens OX=9606 GN=PPIB PE=1 SV=2	17.1296	4	5	4	216	23.728	9.41	101.4	109.4	117	83.8	91.4	97	109.267	90.7333	1.20426	0.0349657
O43157	PLXNB1	Plexin-B1 OS=Homo sapiens OX=9606 GN=PLXNB1 PE=1 SV=3	0.702576	2	2	2	2135	232.151	5.49	110.1	116.5	101	85.7	87.6	99.1	109.2	90.8	1.20264	0.0401445
P10646	TFPI	Tissue factor pathway inhibitor OS=Homo sapiens OX=9606 GN=TFPI PE=1 SV=1	23.3553	5	6	5	304	34.992	8.25	101.7	110.9	114.9	97.4	90.3	84.8	109.167	90.8333	1.20183	0.0265404
P08236	GUSB	Beta-glucuronidase OS=Homo sapiens OX=9606 GN=GUSB PE=1 SV=2	1.38249	1	1	1	651	74.685	7.02	86.8	99.1	86.8	108.8	113.9	104.7	90.9	109.133	0.832926	0.0202909
P08575	PTPRC	Receptor-type tyrosine-protein phosphatase C OS=Homo sapiens OX=9606 GN=PTPRC PE=1 SV=3	0.918836	1	2	1	1306	147.394	6.15	98.8	89.1	83.9	109.2	109.8	109.2	90.6	109.4	0.828154	0.0126323
Q8WZA1	POMGNT1	Protein O-linked-mannose beta-1,2-N-acetylglucosaminyltransferase 1 OS=Homo sapiens OX=9606 GN=POMGNT1 PE=1 SV=2	5.15152	3	3	3	660	75.204	6.83	81.2	95.6	94.9	112.9	105.8	109.6	90.5667	109.433	0.827597	0.0210711
Q9NY15	STAB1	Stabilin-1 OS=Homo sapiens OX=9606 GN=STAB1 PE=1 SV=3	0.544747	1	1	1	2570	275.3	6.49	90.6	85.3	95.7	113.3	103.1	112.1	90.5333	109.5	0.826788	0.012556
Q08380	LGALS3BP	Galectin-3-binding protein OS=Homo sapiens OX=9606 GN=LGALS3BP PE=1 SV=1	31.1111	15	23	15	585	65.289	5.27	85.6	98.1	87.7	116.5	106.1	106	90.4667	109.533	0.825928	0.021491
P01008	SERPINC1	Antithrombin-III OS=Homo sapiens OX=9606 GN=SERPINC1 PE=1 SV=1	64.0086	32	505	32	464	52.569	6.71	94.3	90.8	85.1	102.7	120.5	106.6	90.0667	109.933	0.819284	0.0300945
P49642	PRIM1	DNA primase small subunit OS=Homo sapiens OX=9606 GN=PRIM1 PE=1 SV=1	1.66667	1	1	1	420	49.87	8.21	97.6	88.4	83.8	107.8	116.4	106	89.9333	110.067	0.817081	0.0176559
Q86WI1	PKHD1L1	Fibrocystin-L OS=Homo sapiens OX=9606 GN=PKHD1L1 PE=2 SV=2	1.34339	4	4	4	4243	465.439	6.11	91.1	93.5	84.9	108.1	118.9	103.5	89.8333	110.167	0.815431	0.0177688
Q7Z7M8	B3GNT8	UDP-GlcNAc:betaGal beta-1,3-N-acetylglucosaminyltransferase 8 OS=Homo sapiens OX=9606 GN=B3GNT8 PE=1 SV=1	7.80856	2	3	2	397	43.368	8.32	91.9	85.7	91.8	122.2	109.6	98.8	89.8	110.2	0.814882	0.044688
Q12860	CNTN1	Contactin-1 OS=Homo sapiens OX=9606 GN=CNTN1 PE=1 SV=1	23.6739	17	20	17	1018	113.249	5.9	93.8	92.2	83.2	116.6	100.8	113.3	89.7333	110.233	0.814031	0.0245893
P24387	CRHBP	Corticotropin-releasing factor-binding protein OS=Homo sapiens OX=9606 GN=CRHBP PE=1 SV=2	13.0435	3	3	3	322	36.121	6.52	95.5	88.5	84.6	109.6	118.9	102.9	89.5333	110.467	0.810501	0.0204987
P02774	GC	Vitamin D-binding protein OS=Homo sapiens OX=9606 GN=GC PE=1 SV=1	83.1224	39	576	39	474	52.929	5.54	97.5	86.8	83.9	109.6	111	111.2	89.4	110.6	0.808318	0.00703808
P20908	COL5A1	Collagen alpha-1(V) chain OS=Homo sapiens OX=9606 GN=COL5A1 PE=1 SV=3	2.17628	3	3	2	1838	183.447	5.06	86.9	94.1	87	120.8	113.1	98.2	89.3333	110.7	0.806986	0.0387317
P22105	TNXB	Tenascin-X OS=Homo sapiens OX=9606 GN=TNXB PE=1 SV=4	11.7397	30	45	30	4242	457.932	5.17	84.6	101.1	81.7	110.3	107.9	114.4	89.1333	110.867	0.803969	0.026488
P12110	COL6A2	Collagen alpha-2(VI) chain OS=Homo sapiens OX=9606 GN=COL6A2 PE=1 SV=4	2.55152	2	2	2	1019	108.512	6.21	97.1	81.9	88.3	107.7	105.6	119.4	89.1	110.9	0.803427	0.0239328
P27487	DPP4	Dipeptidyl peptidase 4 OS=Homo sapiens OX=9606 GN=DPP4 PE=1 SV=2	19.9739	17	22	17	766	88.222	6.04	99.4	81.4	86.3	103.3	117.2	112.4	89.0333	110.967	0.802343	0.0313091
Q6UY14	ADAMTSL4	ADAMTS-like protein 4 OS=Homo sapiens OX=9606 GN=ADAMTSL4 PE=1 SV=2	5.77281	5	5	5	1074	116.471	8.34	94	90.6	82.5	116.2	105.9	110.8	89.0333	110.967	0.802343	0.00836141
P49641	MAN2A2	Alpha-mannosidase 2x OS=Homo sapiens OX=9606 GN=MAN2A2 PE=2 SV=3	5.13043	4	4	3	1150	130.457	6.84	85.3	92	89	107.4	110.9	115.4	88.7667	111.233	0.798022	0.00174182
O43895	XPNPEP2	Xaa-Pro aminopeptidase 2 OS=Homo sapiens OX=9606 GN=XPNPEP2 PE=1 SV=3	4.59941	3	3	3	674	75.577	6.04	88.3	76.5	101.1	106.5	108.4	119.1	88.6333	111.333	0.796108	0.0489315
Q9Y6Z7	COLEC10	Collectin-10 OS=Homo sapiens OX=9606 GN=COLEC10 PE=1 SV=2	23.1047	7	10	7	277	30.685	7.33	83.6	95.8	86.5	110.6	108.8	114.7	88.6333	111.367	0.79587	0.00505215
O76061	STC2	Stanniocalcin-2 OS=Homo sapiens OX=9606 GN=STC2 PE=1 SV=1	3.97351	1	2	1	302	33.227	7.3	90.8	87.4	87.7	118.1	101.3	114.8	88.6333	111.4	0.795631	0.0123084
O60888	CUTA	Protein CutA OS=Homo sapiens OX=9606 GN=CUTA PE=1 SV=2	7.82123	1	1	1	179	19.104	5.5	89.2	82.2	94.4	106	121.8	106.3	88.6	111.367	0.79557	0.0225037
O95980	RECK	Reversion-inducing cysteine-rich protein with Kazal motifs OS=Homo sapiens OX=9606 GN=RECK PE=1 SV=1	7.62101	6	6	6	971	106.386	6.74	93.6	91.2	81	115.6	105.2	113.5	88.6	111.433	0.795094	0.0102875
P54764	EPHA4	Ephrin type-A receptor 4 OS=Homo sapiens OX=9606 GN=EPHA4 PE=1 SV=1	7.70791	5	5	5	986	109.79	6.61	88.5	95.8	81.4	117	109.2	108	88.5667	111.4	0.795033	0.0104588
Q13822	ENPP2	Ectonucleotide pyrophosphatase/phosphodiesterase family member 2 OS=Homo sapiens OX=9606 GN=ENPP2 PE=1 SV=3	16.4542	13	16	13	863	98.93	7.37	95	88.4	82.3	113.8	106.9	113.6	88.5667	111.433	0.794795	0.00607211
P01834	IGKC	Immunoglobulin kappa constant OS=Homo sapiens OX=9606 GN=IGKC PE=1 SV=2	63.5514	4	9	4	107	11.758	6.52	91.2	87.2	87.2	119.5	116.9	98	88.5333	111.467	0.794258	0.0293437
Q16853	AOC3	Membrane primary amine oxidase OS=Homo sapiens OX=9606 GN=AOC3 PE=1 SV=3	13.8925	10	12	10	763	84.568	6.52	87.8	96.3	81.3	117.2	113.7	103.6	88.4667	111.5	0.793423	0.0180444
P13598	ICAM2	Intercellular adhesion molecule 2 OS=Homo sapiens OX=9606 GN=ICAM2 PE=1 SV=2	20	5	11	5	275	30.635	7.43	88.1	82.6	94.6	114.8	115.5	104.4	88.4333	111.567	0.79265	0.00976964
P43121	MCAM	Cell surface glycoprotein MUC18 OS=Homo sapiens OX=9606 GN=MCAM PE=1 SV=2	18.4211	9	13	9	646	71.563	5.76	91.7	96.4	76.7	110.4	117.8	107.1	88.2667	111.767	0.789741	0.0250836
Q8N7E2	CBLL2	E3 ubiquitin-protein ligase CBLL2 OS=Homo sapiens OX=9606 GN=CBLL2 PE=1 SV=1	1.64706	1	2	1	425	48.754	9.5	90.9	83.3	90	116.1	119.3	100.3	88.0667	111.9	0.787012	0.0198251
P05556	ITGB1	Integrin beta-1 OS=Homo sapiens OX=9606 GN=ITGB1 PE=1 SV=2	7.64411	6	6	6	798	88.357	5.39	88.3	87.1	88.2	109.1	103.7	123.6	87.8667	112.133	0.783591	0.015151
Q6YHK3	CD109	CD109 antigen OS=Homo sapiens OX=9606 GN=CD109 PE=1 SV=2	13.4948	16	21	16	1445	161.587	5.85	90.8	96.7	75.8	105.1	116.1	115.5	87.7667	112.233	0.782002	0.0270043
P20023	CR2	Complement receptor type 2 OS=Homo sapiens OX=9606 GN=CR2 PE=1 SV=2	10.6486	11	13	11	1033	112.842	7.52	85.9	93.6	83.7	114.9	109.4	112.6	87.7333	112.3	0.781241	0.00194328
P07911	UMOD	Uromodulin OS=Homo sapiens OX=9606 GN=UMOD PE=1 SV=1	9.375	6	7	6	640	69.714	5.24	91.3	90.7	80.4	113.1	125.8	98.7	87.4667	112.533	0.777251	0.0433311
Q14766	LTBP1	Latent-transforming growth factor beta-binding protein 1 OS=Homo sapiens OX=9606 GN=LTBP1 PE=1 SV=4	7.14701	12	14	12	1721	186.673	5.96	74.3	95.2	92.9	109.4	115.7	112.5	87.4667	112.533	0.777251	0.0217159
P16070	CD44	CD44 antigen OS=Homo sapiens OX=9606 GN=CD44 PE=1 SV=3	5.25606	4	9	4	742	81.487	5.33	95.7	90.3	76	119.6	111.8	106.6	87.3333	112.667	0.775148	0.0222385
P08195	SLC3A2	4F2 cell-surface antigen heavy chain OS=Homo sapiens OX=9606 GN=SLC3A2 PE=1 SV=3	18.254	10	14	10	630	67.952	5.01	86.3	90.4	85.2	111	119.6	107.5	87.3	112.7	0.774623	0.00294522
P08253	MMP2	72 kDa type IV collagenase OS=Homo sapiens OX=9606 GN=MMP2 PE=1 SV=2	27.4242	14	22	14	660	73.835	5.47	83.5	90.1	88.1	114.5	110.5	113.3	87.2333	112.767	0.773574	0.000365249
O94985	CLSTN1	Calsyntenin-1 OS=Homo sapiens OX=9606 GN=CLSTN1 PE=1 SV=1	8.35882	8	9	8	981	109.724	4.91	87.1	88.6	85.9	115.6	111.9	110.8	87.2	112.767	0.773278	0.000100911
Q99574	SERPINI1	Neuroserpin OS=Homo sapiens OX=9606 GN=SERPINI1 PE=1 SV=1	2.92683	1	1	1	410	46.397	4.91	83.4	95.7	82.1	125	107.5	106.2	87.0667	112.9	0.771184	0.0256516
Q9ULI3	HEG1	Protein HEG homolog 1 OS=Homo sapiens OX=9606 GN=HEG1 PE=1 SV=3	6.29978	7	8	7	1381	147.369	6.18	90.8	90	80	106.7	129.6	102.9	86.9333	113.067	0.768868	0.0444382
O14498	ISLR	Immunoglobulin superfamily containing leucine-rich repeat protein OS=Homo sapiens OX=9606 GN=ISLR PE=2 SV=1	11.215	4	4	4	428	45.968	5.15	90.3	95.4	75.1	121.1	106.3	111.8	86.9333	113.067	0.768868	0.0249512
Q9HAT2	SIAE	Sialate O-acetylesterase OS=Homo sapiens OX=9606 GN=SIAE PE=1 SV=1	2.48566	1	1	1	523	58.277	7.33	93.8	86.6	80.3	107	121.7	110.6	86.9	113.1	0.768347	0.0113113
Q9NPG4	PCDH12	Protocadherin-12 OS=Homo sapiens OX=9606 GN=PCDH12 PE=1 SV=1	1.52027	1	2	1	1184	128.915	5.29	87.1	85.5	88.1	113.8	115.3	110.2	86.9	113.1	0.768347	0.000101557
P33151	CDH5	Cadherin-5 OS=Homo sapiens OX=9606 GN=CDH5 PE=1 SV=5	14.4133	11	15	11	784	87.474	5.43	84.9	92.4	83.2	106.1	126.8	106.6	86.8333	113.167	0.767305	0.023421
Q04756	HGFAC	Hepatocyte growth factor activator OS=Homo sapiens OX=9606 GN=HGFAC PE=1 SV=1	24.8855	14	25	14	655	70.636	7.24	83.7	89.8	86.9	122.1	102.1	115.3	86.8	113.167	0.76701	0.0126317
P10721	KIT	Mast/stem cell growth factor receptor Kit OS=Homo sapiens OX=9606 GN=KIT PE=1 SV=1	7.37705	7	10	7	976	109.794	6.98	86.6	83.1	90.6	108.9	115.8	114.9	86.7667	113.2	0.76649	0.00099184
Q12841	FSTL1	Follistatin-related protein 1 OS=Homo sapiens OX=9606 GN=FSTL1 PE=1 SV=1	21.4286	6	9	6	308	34.963	5.52	81.7	87.6	90.8	112.3	106.2	121.5	86.7	113.333	0.765	0.00680433
P05067	APP	Amyloid-beta A4 protein OS=Homo sapiens OX=9606 GN=APP PE=1 SV=3	20	13	17	13	770	86.888	4.82	83.4	88.1	88.3	122	102.7	115.5	86.6	113.4	0.763668	0.0104245
P55290	CDH13	Cadherin-13 OS=Homo sapiens OX=9606 GN=CDH13 PE=1 SV=1	18.2328	11	16	11	713	78.238	4.98	82.7	93.9	82.7	112.8	124.4	103.3	86.4333	113.5	0.761527	0.0193668
P0DOX8		Immunoglobulin lambda-1 light chain OS=Homo sapiens OX=9606 PE=1 SV=1	14.3519	3	3	2	216	22.816	6.76	81.7	88.2	89	125.9	108.2	107	86.3	113.7	0.759015	0.0137574
O14786	NRP1	Neuropilin-1 OS=Homo sapiens OX=9606 GN=NRP1 PE=1 SV=3	14.8429	12	18	12	923	103.069	5.88	82.3	91.7	84.6	116	109.1	116.3	86.2	113.8	0.757469	0.00168873
P40197	GP5	Platelet glycoprotein V OS=Homo sapiens OX=9606 GN=GP5 PE=1 SV=1	24.4643	11	20	11	560	60.921	9.63	76.5	94.6	87.3	122.6	115.9	103.2	86.1333	113.9	0.756219	0.0230742
Q8TAT6	NPLOC4	Nuclear protein localization protein 4 homolog OS=Homo sapiens OX=9606 GN=NPLOC4 PE=1 SV=3	1.15132	1	1	1	608	68.077	6.38	91.4	85.8	80.1	105.7	130.7	106.3	85.7667	114.233	0.750802	0.0324721
P13591	NCAM1	Neural cell adhesion molecule 1 OS=Homo sapiens OX=9606 GN=NCAM1 PE=1 SV=3	24.1259	17	27	17	858	94.515	4.87	86.5	87.1	83.3	106.9	117.1	119.1	85.6333	114.367	0.748761	0.00191114
Q10588	BST1	ADP-ribosyl cyclase/cyclic ADP-ribose hydrolase 2 OS=Homo sapiens OX=9606 GN=BST1 PE=1 SV=2	26.4151	7	10	7	318	35.701	7.8	90	86.6	80.3	118.4	110.6	114.1	85.6333	114.367	0.748761	0.0013755
Q92820	GGH	Gamma-glutamyl hydrolase OS=Homo sapiens OX=9606 GN=GGH PE=1 SV=2	41.195	13	26	13	318	35.941	7.11	98.3	74	84.2	109.4	116.8	117.3	85.5	114.5	0.746725	0.0179936
P12111	COL6A3	Collagen alpha-3(VI) chain OS=Homo sapiens OX=9606 GN=COL6A3 PE=1 SV=5	18.2877	47	58	47	3177	343.457	6.68	85.1	90.4	80.6	122.2	108.3	113.3	85.3667	114.6	0.74491	0.00412714
Q9UBQ6	EXTL2	Exostosin-like 2 OS=Homo sapiens OX=9606 GN=EXTL2 PE=1 SV=1	19.697	6	7	6	330	37.441	8.95	84.4	87.4	83.7	116.7	118.6	109.3	85.1667	114.867	0.741439	0.000627146
A2A2Z9	ANKRD18B	Ankyrin repeat domain-containing protein 18B OS=Homo sapiens OX=9606 GN=ANKRD18B PE=1 SV=1	0.692384	1	1	1	1011	118.156	8.15	79.5	81.8	94.1	109.2	101.9	133.5	85.1333	114.867	0.741149	0.0482054
P23470	PTPRG	Receptor-type tyrosine-protein phosphatase gamma OS=Homo sapiens OX=9606 GN=PTPRG PE=1 SV=4	4.84429	7	8	7	1445	161.901	6.42	90	92.8	72.3	112.7	117.5	114.6	85.0333	114.933	0.739849	0.0103976
O43852	CALU	Calumenin OS=Homo sapiens OX=9606 GN=CALU PE=1 SV=2	29.8413	8	13	8	315	37.084	4.64	73.2	96.2	85.6	120.6	118.4	106.1	85	115.033	0.738916	0.0201424
Q15223	NECTIN1	Nectin-1 OS=Homo sapiens OX=9606 GN=NECTIN1 PE=1 SV=3	2.70793	1	1	1	517	57.122	6.1	83.2	90	80.9	118.7	117.8	109.4	84.7	115.3	0.734605	0.00161243
Q8N3T6	TMEM132C	Transmembrane protein 132C OS=Homo sapiens OX=9606 GN=TMEM132C PE=2 SV=3	1.44404	1	1	1	1108	121.711	6.35	93.1	80.3	80.7	122.8	101.2	121.9	84.7	115.3	0.734605	0.0203565
Q9H8L6	MMRN2	Multimerin-2 OS=Homo sapiens OX=9606 GN=MMRN2 PE=1 SV=2	6.21707	4	6	4	949	104.344	5.86	93.5	79.7	80.9	122.2	123.8	100	84.7	115.333	0.734393	0.0258622
P16035	TIMP2	Metalloproteinase inhibitor 2 OS=Homo sapiens OX=9606 GN=TIMP2 PE=1 SV=2	30.9091	6	6	6	220	24.383	7.49	89.7	81.3	82.6	131.3	105.7	109.4	84.5333	115.467	0.732102	0.0211901
P23142	FBLN1	Fibulin-1 OS=Homo sapiens OX=9606 GN=FBLN1 PE=1 SV=4	27.596	16	27	16	703	77.162	5.22	91.3	89	73.2	113.6	112.5	120.4	84.5	115.5	0.731602	0.00749963
O95897	OLFM2	Noelin-2 OS=Homo sapiens OX=9606 GN=OLFM2 PE=1 SV=2	3.30396	1	1	1	454	51.353	7.94	93.7	70.5	89.3	122.3	101.1	123.1	84.5	115.5	0.731602	0.0375901
P09486	SPARC	SPARC OS=Homo sapiens OX=9606 GN=SPARC PE=1 SV=1	41.9142	13	26	13	303	34.61	4.84	75.8	81.2	96.4	112.9	119.6	114.2	84.4667	115.567	0.730891	0.00874191
P54108	CRISP3	Cysteine-rich secretory protein 3 OS=Homo sapiens OX=9606 GN=CRISP3 PE=1 SV=1	9.79592	3	11	3	245	27.612	7.8	90	87.6	74.3	125.1	110	113	83.9667	116.033	0.723643	0.00882272
P55285	CDH6	Cadherin-6 OS=Homo sapiens OX=9606 GN=CDH6 PE=1 SV=1	2.65823	2	2	2	790	88.254	4.93	86.8	87.8	77.1	123.7	112.6	112.1	83.9	116.133	0.722445	0.0031989
P10124	SRGN	Serglycin OS=Homo sapiens OX=9606 GN=SRGN PE=1 SV=3	17.0886	2	5	2	158	17.641	4.96	82.9	72.3	96.1	111.9	116.4	120.3	83.7667	116.2	0.720884	0.0113051
P08185	SERPINA6	Corticosteroid-binding globulin OS=Homo sapiens OX=9606 GN=SERPINA6 PE=1 SV=1	31.6049	10	46	10	405	45.112	6.04	72.8	91.8	86.3	112.1	127.4	109.7	83.6333	116.4	0.718499	0.014357
P05121	SERPINE1	Plasminogen activator inhibitor 1 OS=Homo sapiens OX=9606 GN=SERPINE1 PE=1 SV=1	22.6368	8	10	8	402	45.031	7.2	76.2	84.6	88	120	121.2	110.1	82.9333	117.1	0.708227	0.00233975
P54289	CACNA2D1	Voltage-dependent calcium channel subunit alpha-2/delta-1 OS=Homo sapiens OX=9606 GN=CACNA2D1 PE=1 SV=3	14.1432	12	14	12	1103	124.49	5.27	81.5	86.9	79.7	120	116.9	115	82.7	117.3	0.70503	0.000186644
Q13201	MMRN1	Multimerin-1 OS=Homo sapiens OX=9606 GN=MMRN1 PE=1 SV=3	14.3322	14	19	14	1228	138.023	7.93	76.7	85.7	85	113.4	124.8	114.6	82.4667	117.6	0.701247	0.00161742
P02775	PPBP	Platelet basic protein OS=Homo sapiens OX=9606 GN=PPBP PE=1 SV=3	46.875	8	69	8	128	13.885	8.79	74.9	79.7	92.5	119.7	114.8	118.4	82.3667	117.633	0.700198	0.00294511
Q9NR99	MXRA5	Matrix-remodeling-associated protein 5 OS=Homo sapiens OX=9606 GN=MXRA5 PE=1 SV=3	0.247525	1	1	1	2828	311.955	8.32	86	87.3	73.4	123.8	108	121.5	82.2333	117.767	0.698273	0.00584327
Q13103	SPP2	Secreted phosphoprotein 24 OS=Homo sapiens OX=9606 GN=SPP2 PE=1 SV=1	26.5403	5	8	5	211	24.322	8.32	79.3	84.5	82.6	124.1	103.2	126.2	82.1333	117.833	0.69703	0.00889382
P05155	SERPING1	Plasma protease C1 inhibitor OS=Homo sapiens OX=9606 GN=SERPING1 PE=1 SV=2	33	17	122	17	500	55.119	6.55	60.8	99.9	83.3	114.7	112.4	129	81.3333	118.7	0.685201	0.0400144
P12955	PEPD	Xaa-Pro dipeptidase OS=Homo sapiens OX=9606 GN=PEPD PE=1 SV=3	25.9635	11	15	11	493	54.513	6	88.4	74.5	79	122.4	111.8	123.8	80.6333	119.333	0.675698	0.0022671
Q9NPY3	CD93	Complement component C1q receptor OS=Homo sapiens OX=9606 GN=CD93 PE=1 SV=3	10.4294	6	8	6	652	68.515	5.44	85.3	87	69.6	117.2	125.7	115.2	80.6333	119.367	0.67551	0.00377413
P0DOY2	IGLC2	Immunoglobulin lambda constant 2 OS=Homo sapiens OX=9606 GN=IGLC2 PE=1 SV=1	48.1132	4	6	3	106	11.287	7.24	67	81.4	93.1	103.3	123.8	131.4	80.5	119.5	0.67364	0.0259277
Q8IUL8	CILP2	Cartilage intermediate layer protein 2 OS=Homo sapiens OX=9606 GN=CILP2 PE=2 SV=2	4.67128	5	6	5	1156	126.211	8.22	73.1	82.8	84.5	125	104.3	130.4	80.1333	119.9	0.668335	0.010298
Q12805	EFEMP1	EGF-containing fibulin-like extracellular matrix protein 1 OS=Homo sapiens OX=9606 GN=EFEMP1 PE=1 SV=2	42.7992	16	25	16	493	54.604	5.07	81.2	88.8	69.8	131.7	105.3	123.1	79.9333	120.033	0.665926	0.0136346
P20851	C4BPB	C4b-binding protein beta chain OS=Homo sapiens OX=9606 GN=C4BPB PE=1 SV=1	47.2222	9	35	9	252	28.338	5.14	60.9	99.5	78	115.3	122.5	123.8	79.4667	120.533	0.659292	0.0231964
P02765	AHSG	Alpha-2-HS-glycoprotein OS=Homo sapiens OX=9606 GN=AHSG PE=1 SV=1	50.9537	12	214	12	367	39.3	5.72	78.3	78.8	81.3	119.3	110.7	131.6	79.4667	120.533	0.659292	0.0025914
P14151	SELL	L-selectin OS=Homo sapiens OX=9606 GN=SELL PE=1 SV=2	19.3548	9	16	9	372	42.159	6.6	80.3	77.8	79.5	119.6	124.3	118.5	79.2	120.8	0.655629	2.71374e-05
Q12884	FAP	Prolyl endopeptidase FAP OS=Homo sapiens OX=9606 GN=FAP PE=1 SV=5	10.1316	9	15	8	760	87.657	6.65	83.8	74.2	78.5	110.1	128.3	125	78.8333	121.133	0.650798	0.00248498
Q9BXJ4	C1QTNF3	Complement C1q tumor necrosis factor-related protein 3 OS=Homo sapiens OX=9606 GN=C1QTNF3 PE=1 SV=1	2.84553	1	1	1	246	26.977	6.52	86.3	76.4	73.7	127.5	117.9	118.2	78.8	121.2	0.650165	0.00102788
P02787	TF	Serotransferrin OS=Homo sapiens OX=9606 GN=TF PE=1 SV=3	19.7708	12	13	12	698	77.014	7.12	75.4	77.1	83.7	103.5	126.8	133.5	78.7333	121.267	0.649258	0.0107651
Q13449	LSAMP	Limbic system-associated membrane protein OS=Homo sapiens OX=9606 GN=LSAMP PE=1 SV=2	10.6509	3	3	3	338	37.37	6.98	81	87.6	67.4	135.4	109.2	119.4	78.6667	121.333	0.648352	0.0115787
A6QL64	ANKRD36	Ankyrin repeat domain-containing protein 36A OS=Homo sapiens OX=9606 GN=ANKRD36 PE=2 SV=3	0.927357	1	1	1	1941	217.331	8.66	82.9	71.2	80.9	127.7	120.2	117	78.3333	121.633	0.644012	0.00084118
P05452	CLEC3B	Tetranectin OS=Homo sapiens OX=9606 GN=CLEC3B PE=1 SV=3	57.4257	11	35	11	202	22.522	5.67	86.2	73.3	75.3	117.2	119.2	128.8	78.2667	121.733	0.642935	0.00127019
P04003	C4BPA	C4b-binding protein alpha chain OS=Homo sapiens OX=9606 GN=C4BPA PE=1 SV=2	56.2814	27	124	27	597	66.989	7.3	62.2	94.7	77.1	119.6	118.6	127.8	78	122	0.639344	0.0110401
P06727	APOA4	Apolipoprotein A-IV OS=Homo sapiens OX=9606 GN=APOA4 PE=1 SV=3	84.8485	38	200	38	396	45.371	5.38	69	94	66.1	116.9	145.3	108.8	76.3667	123.667	0.61752	0.0289138
Q99983	OMD	Osteomodulin OS=Homo sapiens OX=9606 GN=OMD PE=1 SV=1	13.3017	5	5	5	421	49.46	5.59	75.5	83.8	69.6	115.6	124.5	131	76.3	123.7	0.616815	0.00145438
P49747	COMP	Cartilage oligomeric matrix protein OS=Homo sapiens OX=9606 GN=COMP PE=1 SV=2	41.6116	21	34	19	757	82.808	4.6	66.7	84.2	76.9	132.3	111.4	128.5	75.9333	124.067	0.612037	0.00418717
O14793	MSTN	Growth/differentiation factor 8 OS=Homo sapiens OX=9606 GN=MSTN PE=1 SV=1	4.26667	1	1	1	375	42.722	6.76	74.6	92.6	59.6	145.7	114.2	113.2	75.6	124.367	0.60788	0.0270979
Q15063	POSTN	Periostin OS=Homo sapiens OX=9606 GN=POSTN PE=1 SV=2	29.6651	17	22	17	836	93.255	7.53	79.1	80.1	66.8	141.6	108.4	124	75.3333	124.667	0.604278	0.0093197
Q06828	FMOD	Fibromodulin OS=Homo sapiens OX=9606 GN=FMOD PE=1 SV=2	1.8617	1	1	1	376	43.152	6.04	81.3	86.6	57.3	151.4	117.2	106.1	75.0667	124.9	0.601014	0.0380555
A0A0C4DH29	IGHV1-3	Immunoglobulin heavy variable 1-3 OS=Homo sapiens OX=9606 GN=IGHV1-3 PE=3 SV=1	5.98291	1	1	1	117	12.999	9.55	71.5	63.8	86.8	149	125.3	103.6	74.0333	125.967	0.587722	0.0244301
Q7Z7G0	ABI3BP	Target of Nesh-SH3 OS=Homo sapiens OX=9606 GN=ABI3BP PE=1 SV=1	6.60465	5	7	5	1075	118.569	9.44	74.6	75	71.9	113	144.9	120.5	73.8333	126.133	0.585359	0.00567906
P07996	THBS1	Thrombospondin-1 OS=Homo sapiens OX=9606 GN=THBS1 PE=1 SV=2	42.9915	46	126	46	1170	129.3	4.94	64.6	75.1	80	122.7	137.8	119.8	73.2333	126.767	0.577702	0.00174269
P51884	LUM	Lumican OS=Homo sapiens OX=9606 GN=LUM PE=1 SV=2	40.8284	13	96	13	338	38.405	6.61	80.4	68.2	67.6	129	123.3	131.5	72.0667	127.933	0.563314	0.000317814
Q15485	FCN2	Ficolin-2 OS=Homo sapiens OX=9606 GN=FCN2 PE=1 SV=2	17.2524	5	13	5	313	33.98	6.77	69.6	80	66.3	118.3	132.4	133.4	71.9667	128.033	0.562093	0.000929308
P06396	GSN	Gelsolin OS=Homo sapiens OX=9606 GN=GSN PE=1 SV=1	61.8926	37	227	37	782	85.644	6.28	77.2	68.8	68	125.2	132.8	128	71.3333	128.667	0.554404	9.96769e-05
Q6UXB8	PI16	Peptidase inhibitor 16 OS=Homo sapiens OX=9606 GN=PI16 PE=1 SV=1	26.3499	10	17	10	463	49.44	5.39	74	69.8	59.6	137.9	114.7	144	67.8	132.2	0.512859	0.00287805
Q5SYB0	FRMPD1	FERM and PDZ domain-containing protein 1 OS=Homo sapiens OX=9606 GN=FRMPD1 PE=1 SV=1	0.443599	1	3	1	1578	173.328	5.25	83.6	70.3	49.2	130.5	129.2	137.2	67.7	132.3	0.511716	0.0033191
Q14314	FGL2	Fibroleukin OS=Homo sapiens OX=9606 GN=FGL2 PE=1 SV=1	5.23918	2	2	2	439	50.197	7.39	61.5	62.1	61.1	165.4	130.2	119.7	61.5667	138.433	0.444739	0.00512058
P01023	A2M	Alpha-2-macroglobulin OS=Homo sapiens OX=9606 GN=A2M PE=1 SV=3	48.9824	54	150	46	1474	163.188	6.46	53.1	69.2	60.5	154.2	143.8	119.3	60.9333	139.1	0.438054	0.00232481
P04745	AMY1A	Alpha-amylase 1 OS=Homo sapiens OX=9606 GN=AMY1A PE=1 SV=2	10.3718	5	6	1	511	57.731	6.93	48.7	66.6	61.7	127.4	180.7	114.9	59	141	0.41844	0.0171168
P02652	APOA2	Apolipoprotein A-II OS=Homo sapiens OX=9606 GN=APOA2 PE=1 SV=1	68	7	59	7	100	11.168	6.62	46.1	85.3	349.9	35	39.5	44.3	160.433	39.6	4.05135	0.274223
P02679	FGG	Fibrinogen gamma chain OS=Homo sapiens OX=9606 GN=FGG PE=1 SV=3	56.0706	21	34	21	453	51.479	5.62	63.9	72.6	327	41.9	47.9	46.7	154.5	45.5	3.3956	0.275212
Q8WUY3	PRUNE2	Protein prune homolog 2 OS=Homo sapiens OX=9606 GN=PRUNE2 PE=1 SV=3	0.226684	1	1	1	3088	340.425	4.45	266	119	73.9	42.8	43.4	55	152.967	47.0667	3.25	0.142596
P09493	TPM1	Tropomyosin alpha-1 chain OS=Homo sapiens OX=9606 GN=TPM1 PE=1 SV=2	19.3662	7	7	3	284	32.689	4.74	125.2	97.1	230.7	46.8	45.5	54.6	151	48.9667	3.08373	0.0665615
P02675	FGB	Fibrinogen beta chain OS=Homo sapiens OX=9606 GN=FGB PE=1 SV=2	45.8248	18	29	18	491	55.892	8.27	64.9	86	296.3	49.3	52.3	51.1	149.067	50.9	2.92862	0.254632
P00325	ADH1B	Alcohol dehydrogenase 1B OS=Homo sapiens OX=9606 GN=ADH1B PE=1 SV=2	27.4667	10	14	2	375	39.829	8.29	340.6	45.5	58.6	45.5	62.1	47.6	148.233	51.7333	2.86534	0.373451
P00367	GLUD1	Glutamate dehydrogenase 1, mitochondrial OS=Homo sapiens OX=9606 GN=GLUD1 PE=1 SV=2	8.78136	5	5	5	558	61.359	7.8	256.4	89.6	94.1	54.6	52.6	52.8	146.7	53.3333	2.75063	0.164042
P02656	APOC3	Apolipoprotein C-III OS=Homo sapiens OX=9606 GN=APOC3 PE=1 SV=1	55.5556	6	25	6	99	10.845	5.41	62.5	293.1	74	60	66.6	43.8	143.2	56.8	2.52113	0.315335
P00352	ALDH1A1	Retinal dehydrogenase 1 OS=Homo sapiens OX=9606 GN=ALDH1A1 PE=1 SV=2	17.9641	8	9	8	501	54.827	6.73	266.1	65.8	95.9	56.9	61.8	53.5	142.6	57.4	2.48432	0.243908
P0CG39	POTEJ	POTE ankyrin domain family member J OS=Homo sapiens OX=9606 GN=POTEJ PE=3 SV=1	5.10597	4	9	1	1038	117.315	5.97	156.8	62.2	206.5	55.1	65.1	54.4	141.833	58.2	2.437	0.120234
P02654	APOC1	Apolipoprotein C-I OS=Homo sapiens OX=9606 GN=APOC1 PE=1 SV=1	34.9398	5	9	5	83	9.326	8.47	82.4	153.8	188.4	63.3	66.5	45.5	141.533	58.4333	2.42213	0.0596527
P05062	ALDOB	Fructose-bisphosphate aldolase B OS=Homo sapiens OX=9606 GN=ALDOB PE=1 SV=2	43.4066	17	24	17	364	39.448	7.87	242	64	113.9	55.4	64	60.7	139.967	60.0333	2.33148	0.206488
Q8WTV1	THAP3	THAP domain-containing protein 3 OS=Homo sapiens OX=9606 GN=THAP3 PE=1 SV=1	3.34728	1	3	1	239	27.042	10.24	83.8	198.9	136.8	69.8	54.5	56.2	139.833	60.1667	2.3241	0.0768033
P61158	ACTR3	Actin-related protein 3 OS=Homo sapiens OX=9606 GN=ACTR3 PE=1 SV=3	4.30622	2	2	2	418	47.341	5.88	157	78.5	180.7	58.6	63.8	61.4	138.733	61.2667	2.26442	0.0663862
P04406	GAPDH	Glyceraldehyde-3-phosphate dehydrogenase OS=Homo sapiens OX=9606 GN=GAPDH PE=1 SV=3	38.806	10	16	10	335	36.03	8.46	203	71.5	141	63.2	58.9	62.5	138.5	61.5333	2.25081	0.112829
Q16851	UGP2	UTP--glucose-1-phosphate uridylyltransferase OS=Homo sapiens OX=9606 GN=UGP2 PE=1 SV=5	16.1417	7	8	7	508	56.905	8.15	225.9	80.5	108	63.6	56	66	138.133	61.8667	2.23276	0.163148
P09467	FBP1	Fructose-1,6-bisphosphatase 1 OS=Homo sapiens OX=9606 GN=FBP1 PE=1 SV=5	11.2426	3	3	3	338	36.819	6.99	223	88.3	102.8	61.3	65.9	58.7	138.033	61.9667	2.22754	0.149734
P02144	MB	Myoglobin OS=Homo sapiens OX=9606 GN=MB PE=1 SV=2	18.8312	3	3	3	154	17.173	7.68	64.1	257.7	90.9	56	59.5	71.8	137.567	62.4333	2.20342	0.28384
P07148	FABP1	Fatty acid-binding protein, liver OS=Homo sapiens OX=9606 GN=FABP1 PE=1 SV=1	50.3937	5	8	5	127	14.199	7.18	254.8	84.9	72.8	57.5	80.2	49.8	137.5	62.5	2.2	0.275718
P12814	ACTN1	Alpha-actinin-1 OS=Homo sapiens OX=9606 GN=ACTN1 PE=1 SV=2	28.9238	19	22	11	892	102.993	5.41	137.7	73.8	200.6	62.7	64.6	60.6	137.367	62.6333	2.19319	0.110864
P06733	ENO1	Alpha-enolase OS=Homo sapiens OX=9606 GN=ENO1 PE=1 SV=2	38.2488	12	17	12	434	47.139	7.39	176.7	77.5	156.8	62.2	65.7	61	137	62.9667	2.17575	0.0711517
P08567	PLEK	Pleckstrin OS=Homo sapiens OX=9606 GN=PLEK PE=1 SV=3	22.8571	6	9	6	350	40.099	8.28	99.9	114.4	194.7	51	68.9	71.1	136.333	63.6667	2.14136	0.0736129
P42765	ACAA2	3-ketoacyl-CoA thiolase, mitochondrial OS=Homo sapiens OX=9606 GN=ACAA2 PE=1 SV=2	7.55668	3	3	3	397	41.898	8.09	261.4	78	67.6	65.8	63.1	64	135.667	64.3	2.1099	0.320214
P36871	PGM1	Phosphoglucomutase-1 OS=Homo sapiens OX=9606 GN=PGM1 PE=1 SV=3	8.00712	4	5	4	562	61.411	6.76	190.6	95.4	118.3	62.6	70.8	62.4	134.767	65.2667	2.06486	0.0734461
P05451	REG1A	Lithostathine-1-alpha OS=Homo sapiens OX=9606 GN=REG1A PE=1 SV=3	14.4578	2	3	2	166	18.719	5.94	89.1	197	116.6	69.3	68.8	59.2	134.233	65.7667	2.04105	0.103164
P52209	PGD	6-phosphogluconate dehydrogenase, decarboxylating OS=Homo sapiens OX=9606 GN=PGD PE=1 SV=3	29.1925	13	17	13	483	53.106	7.23	173.5	85.2	142.7	68.7	64.7	65.2	133.8	66.2	2.02115	0.059456
P63261	ACTG1	Actin, cytoplasmic 2 OS=Homo sapiens OX=9606 GN=ACTG1 PE=1 SV=1	58.1333	16	79	1	375	41.766	5.48	165.6	56.8	178.9	64.2	63.1	71.3	133.767	66.2	2.02064	0.156249
P17516	AKR1C4	Aldo-keto reductase family 1 member C4 OS=Homo sapiens OX=9606 GN=AKR1C4 PE=1 SV=3	2.16718	1	1	1	323	37.043	6.93	239.7	82.1	77.4	58	83.5	59.3	133.067	66.9333	1.98805	0.287688
Q9NS98	SEMA3G	Semaphorin-3G OS=Homo sapiens OX=9606 GN=SEMA3G PE=2 SV=1	1.27877	1	1	1	782	86.646	7.78	76.1	189	132.9	67.9	59.5	74.6	132.667	67.3333	1.9703	0.117876
P00505	GOT2	Aspartate aminotransferase, mitochondrial OS=Homo sapiens OX=9606 GN=GOT2 PE=1 SV=3	9.30233	3	4	3	430	47.487	9.01	270.4	63.9	63.6	69.9	69.6	62.6	132.633	67.3667	1.96883	0.397295
P62736	ACTA2	Actin, aortic smooth muscle OS=Homo sapiens OX=9606 GN=ACTA2 PE=1 SV=1	32.8912	10	44	2	377	41.982	5.39	140.1	66.3	191.2	60.6	72.4	69.4	132.533	67.4667	1.96443	0.148595
Q96PZ2	FAM111A	Protein FAM111A OS=Homo sapiens OX=9606 GN=FAM111A PE=1 SV=2	1.63666	1	2	1	611	70.151	8.53	206.4	133.9	56.4	11.8	116	75.5	132.233	67.7667	1.9513	0.289713
P23528	CFL1	Cofilin-1 OS=Homo sapiens OX=9606 GN=CFL1 PE=1 SV=3	73.494	11	16	11	166	18.491	8.09	115.4	95.3	185.6	65.5	66.1	71.9	132.1	67.8333	1.94742	0.0792574
P32754	HPD	4-hydroxyphenylpyruvate dioxygenase OS=Homo sapiens OX=9606 GN=HPD PE=1 SV=2	13.7405	6	6	6	393	44.906	7.01	209.3	66.8	119.3	66.6	64.8	73.1	131.8	68.1667	1.9335	0.20158
P11766	ADH5	Alcohol dehydrogenase class-3 OS=Homo sapiens OX=9606 GN=ADH5 PE=1 SV=4	4.54545	2	2	2	374	39.698	7.49	204.8	76.2	114.2	69.4	69.1	66.3	131.733	68.2667	1.92969	0.171589
P67936	TPM4	Tropomyosin alpha-4 chain OS=Homo sapiens OX=9606 GN=TPM4 PE=1 SV=3	50.8065	16	19	11	248	28.504	4.69	95.6	114.1	185.4	54.1	75	75.7	131.7	68.2667	1.9292	0.0883093
P16152	CBR1	Carbonyl reductase [NADPH] 1 OS=Homo sapiens OX=9606 GN=CBR1 PE=1 SV=3	5.41516	1	1	1	277	30.356	8.32	153.9	85.9	153.5	63.5	73.2	69.9	131.1	68.8667	1.90368	0.0523321
Q9Y490	TLN1	Talin-1 OS=Homo sapiens OX=9606 GN=TLN1 PE=1 SV=3	28.5714	57	71	57	2541	269.599	6.07	99	96.6	197.7	63.7	71.8	71.2	131.1	68.9	1.90276	0.13612
Q9ULV4	CORO1C	Coronin-1C OS=Homo sapiens OX=9606 GN=CORO1C PE=1 SV=1	5.90717	3	3	3	474	53.215	7.08	109	109.7	169.2	54.9	68.7	88.5	129.3	70.7	1.82885	0.0576478
P00326	ADH1C	Alcohol dehydrogenase 1C OS=Homo sapiens OX=9606 GN=ADH1C PE=1 SV=2	27.7333	10	13	2	375	39.842	8.29	260	58.2	68.9	69.7	80.5	62.6	129.033	70.9333	1.81908	0.426878
P35579	MYH9	Myosin-9 OS=Homo sapiens OX=9606 GN=MYH9 PE=1 SV=4	13.5714	23	24	23	1960	226.392	5.6	102.4	80.1	203.8	67.5	75.5	70.7	128.767	71.2333	1.80767	0.205888
P11413	G6PD	Glucose-6-phosphate 1-dehydrogenase OS=Homo sapiens OX=9606 GN=G6PD PE=1 SV=4	4.46602	2	2	2	515	59.219	6.84	153.2	86	146	77.1	71.3	66.5	128.4	71.6333	1.79246	0.0577166
P06702	S100A9	Protein S100-A9 OS=Homo sapiens OX=9606 GN=S100A9 PE=1 SV=1	81.5789	8	36	8	114	13.234	6.13	168.4	87.8	128.9	71.2	78	65.7	128.367	71.6333	1.792	0.0735409
P07478	PRSS2	Trypsin-2 OS=Homo sapiens OX=9606 GN=PRSS2 PE=1 SV=1	15.3846	3	4	2	247	26.471	4.92	94	206.3	84.5	72.1	76.9	66.1	128.267	71.7	1.78894	0.222853
P02794	FTH1	Ferritin heavy chain OS=Homo sapiens OX=9606 GN=FTH1 PE=1 SV=2	10.929	2	2	2	183	21.212	5.55	197.8	86.7	99.4	51.9	93.3	70.9	127.967	72.0333	1.77649	0.206046
P00480	OTC	Ornithine carbamoyltransferase, mitochondrial OS=Homo sapiens OX=9606 GN=OTC PE=1 SV=3	5.36723	2	2	2	354	39.91	8.63	234.3	71	78.5	71.2	63.7	81.2	127.933	72.0333	1.77603	0.354816
P02671	FGA	Fibrinogen alpha chain OS=Homo sapiens OX=9606 GN=FGA PE=1 SV=2	40.0693	29	93	29	866	94.914	6.01	91.4	91.7	200.4	70.3	67.7	78.4	127.833	72.1333	1.77218	0.200968
P06737	PYGL	Glycogen phosphorylase, liver form OS=Homo sapiens OX=9606 GN=PYGL PE=1 SV=4	18.536	15	17	15	847	97.087	7.17	179.3	80.5	123.5	73.1	70.6	73	127.767	72.2333	1.7688	0.124252
P04424	ASL	Argininosuccinate lyase OS=Homo sapiens OX=9606 GN=ASL PE=1 SV=4	4.31034	2	2	2	464	51.625	6.48	170	110.1	102.6	72.7	70.5	74.1	127.567	72.4333	1.76116	0.0611951
P52758	RIDA	2-iminobutanoate/2-iminopropanoate deaminase OS=Homo sapiens OX=9606 GN=RIDA PE=1 SV=1	13.8686	1	1	1	137	14.485	8.68	180.1	130.9	71.2	82.1	80.6	55.2	127.4	72.6333	1.75402	0.169001
P04083	ANXA1	Annexin A1 OS=Homo sapiens OX=9606 GN=ANXA1 PE=1 SV=2	13.8728	4	5	4	346	38.69	7.02	91.8	93.1	196.7	72.7	74.5	71.2	127.2	72.8	1.74725	0.192683
Q06830	PRDX1	Peroxiredoxin-1 OS=Homo sapiens OX=9606 GN=PRDX1 PE=1 SV=1	24.1206	5	5	4	199	22.096	8.13	169.1	96.2	115.2	70.8	76	72.7	126.833	73.1667	1.73349	0.0702885
P61160	ACTR2	Actin-related protein 2 OS=Homo sapiens OX=9606 GN=ACTR2 PE=1 SV=1	4.82234	2	2	2	394	44.732	6.74	139.2	80.1	160.9	71.3	74.8	73.7	126.733	73.2667	1.72975	0.0913702
Q5D862	FLG2	Filaggrin-2 OS=Homo sapiens OX=9606 GN=FLG2 PE=1 SV=1	0.460059	1	1	1	2391	247.928	8.31	101.6	204.9	73.6	78.5	74.4	67	126.7	73.3	1.72851	0.25347
P49913	CAMP	Cathelicidin antimicrobial peptide OS=Homo sapiens OX=9606 GN=CAMP PE=1 SV=1	24.1176	5	5	5	170	19.289	9.41	98.7	87.7	193.6	67.9	94.1	58	126.667	73.3333	1.72727	0.205347
P63104	YWHAZ	14-3-3 protein zeta/delta OS=Homo sapiens OX=9606 GN=YWHAZ PE=1 SV=1	50.2041	12	20	8	245	27.728	4.79	131.9	78.4	169.5	66.8	78.7	74.8	126.6	73.4333	1.72401	0.116907
Q93088	BHMT	Betaine--homocysteine S-methyltransferase 1 OS=Homo sapiens OX=9606 GN=BHMT PE=1 SV=2	11.5764	4	5	4	406	44.97	7.03	207.9	87.7	84	73.5	74.9	72	126.533	73.4667	1.72232	0.262317
P54868	HMGCS2	Hydroxymethylglutaryl-CoA synthase, mitochondrial OS=Homo sapiens OX=9606 GN=HMGCS2 PE=1 SV=1	1.77165	1	1	1	508	56.599	8.16	260.7	63.7	55.2	80.1	71	69.3	126.533	73.4667	1.72232	0.473963
P0DMV9	HSPA1B	Heat shock 70 kDa protein 1B OS=Homo sapiens OX=9606 GN=HSPA1B PE=1 SV=1	19.1888	11	13	8	641	70.009	5.66	132.6	85.4	160.3	76	76.1	69.7	126.1	73.9333	1.70559	0.0764216
Q05682	CALD1	Caldesmon OS=Homo sapiens OX=9606 GN=CALD1 PE=1 SV=3	1.89155	2	2	2	793	93.175	5.66	87.6	161.7	128.2	58.2	74.3	90	125.833	74.1667	1.69663	0.0909419
P02792	FTL	Ferritin light chain OS=Homo sapiens OX=9606 GN=FTL PE=1 SV=2	48.5714	7	9	7	175	20.007	5.78	214.2	70.7	92.4	52.9	75.4	94.3	125.767	74.2	1.69497	0.327185
O60234	GMFG	Glia maturation factor gamma OS=Homo sapiens OX=9606 GN=GMFG PE=1 SV=1	33.8028	4	4	4	142	16.79	5.26	129.2	91.3	155.9	71.9	79.1	72.6	125.467	74.5333	1.68336	0.0542313
P60660	MYL6	Myosin light polypeptide 6 OS=Homo sapiens OX=9606 GN=MYL6 PE=1 SV=2	24.5033	3	3	3	151	16.919	4.65	111	75.9	188.9	64.9	86.8	72.5	125.267	74.7333	1.67618	0.21143
P13284	IFI30	Gamma-interferon-inducible lysosomal thiol reductase OS=Homo sapiens OX=9606 GN=IFI30 PE=1 SV=3	3.6	1	1	1	250	27.945	4.88	83.8	154.5	136	83.2	68.7	73.9	124.767	75.2667	1.65766	0.0835936
Q9UBW5	BIN2	Bridging integrator 2 OS=Homo sapiens OX=9606 GN=BIN2 PE=1 SV=3	3.53982	2	2	2	565	61.837	5.15	88.6	139.2	145.9	53.6	88.9	83.8	124.567	75.4333	1.65135	0.0811293
P00966	ASS1	Argininosuccinate synthase OS=Homo sapiens OX=9606 GN=ASS1 PE=1 SV=2	7.76699	2	2	2	412	46.501	8.02	228.3	77.1	67.3	80.6	75.4	71.3	124.233	75.7667	1.63968	0.405547
P40925	MDH1	Malate dehydrogenase, cytoplasmic OS=Homo sapiens OX=9606 GN=MDH1 PE=1 SV=4	25.1497	8	10	8	334	36.403	7.36	168.9	86.3	117.1	73.7	79.9	74.1	124.1	75.9	1.63505	0.117033
O15144	ARPC2	Actin-related protein 2/3 complex subunit 2 OS=Homo sapiens OX=9606 GN=ARPC2 PE=1 SV=1	14	5	5	5	300	34.311	7.36	150.1	69.7	150.3	74	80.9	75	123.367	76.6333	1.60983	0.157567
P60709	ACTB	Actin, cytoplasmic 1 OS=Homo sapiens OX=9606 GN=ACTB PE=1 SV=1	58.1333	16	85	1	375	41.71	5.48	126.4	78.7	164.7	82.6	69.9	77.7	123.267	76.7333	1.60643	0.137938
P15090	FABP4	Fatty acid-binding protein, adipocyte OS=Homo sapiens OX=9606 GN=FABP4 PE=1 SV=3	37.8788	4	4	4	132	14.709	7.14	70.3	224.2	74.4	83	66.9	81.3	122.967	77.0667	1.59559	0.418065
Q13418	ILK	Integrin-linked protein kinase OS=Homo sapiens OX=9606 GN=ILK PE=1 SV=2	6.85841	4	4	4	452	51.386	8.07	94.3	82.1	191.3	75.2	75.2	81.9	122.567	77.4333	1.58287	0.262297
P50395	GDI2	Rab GDP dissociation inhibitor beta OS=Homo sapiens OX=9606 GN=GDI2 PE=1 SV=2	25.1685	9	9	6	445	50.631	6.47	155.4	92.5	119.1	79.4	80	73.5	122.333	77.6333	1.57578	0.071489
Q3LXA3	TKFC	Triokinase/FMN cyclase OS=Homo sapiens OX=9606 GN=TKFC PE=1 SV=2	3.47826	2	2	2	575	58.91	7.49	206	72.4	88.3	92.4	71.7	69.2	122.233	77.7667	1.5718	0.357213
P18669	PGAM1	Phosphoglycerate mutase 1 OS=Homo sapiens OX=9606 GN=PGAM1 PE=1 SV=2	20.0787	4	5	4	254	28.786	7.18	164	84	118.5	83.9	77	72.7	122.167	77.8667	1.56892	0.131212
P11142	HSPA8	Heat shock cognate 71 kDa protein OS=Homo sapiens OX=9606 GN=HSPA8 PE=1 SV=1	25.2322	15	19	11	646	70.854	5.52	144.4	86.3	135	81.1	78.6	74.5	121.9	78.0667	1.56149	0.0727124
P21333	FLNA	Filamin-A OS=Homo sapiens OX=9606 GN=FLNA PE=1 SV=4	25.2361	49	58	49	2647	280.564	6.06	102.6	106	156.6	68.7	81.6	84.5	121.733	78.2667	1.55537	0.07449
P25789	PSMA4	Proteasome subunit alpha type-4 OS=Homo sapiens OX=9606 GN=PSMA4 PE=1 SV=1	30.2682	7	8	7	261	29.465	7.72	159.4	90.3	115	76.3	78.9	80.1	121.567	78.4333	1.54994	0.100167
P07738	BPGM	Bisphosphoglycerate mutase OS=Homo sapiens OX=9606 GN=BPGM PE=1 SV=2	21.2355	5	6	5	259	29.987	6.54	155.2	96.9	112	70.5	95.3	70	121.367	78.6	1.54411	0.0917585
Q9Y279	VSIG4	V-set and immunoglobulin domain-containing protein 4 OS=Homo sapiens OX=9606 GN=VSIG4 PE=1 SV=1	5.26316	1	1	1	399	43.959	6.35	95.2	199	69.8	84	82.3	69.7	121.333	78.6667	1.54237	0.343823
P29401	TKT	Transketolase OS=Homo sapiens OX=9606 GN=TKT PE=1 SV=3	34.6709	14	20	14	623	67.835	7.66	152.4	90.4	120.1	81.9	74.3	81	120.967	79.0667	1.52993	0.0811661
Q00796	SORD	Sorbitol dehydrogenase OS=Homo sapiens OX=9606 GN=SORD PE=1 SV=4	2.52101	1	1	1	357	38.3	7.97	182.4	85.3	95	82.2	79	76.2	120.9	79.1333	1.5278	0.248192
P78417	GSTO1	Glutathione S-transferase omega-1 OS=Homo sapiens OX=9606 GN=GSTO1 PE=1 SV=2	35.6846	10	12	10	241	27.548	6.6	153.5	84.8	124	77.7	84.4	75.6	120.767	79.2333	1.52419	0.107349
P31327	CPS1	Carbamoyl-phosphate synthase [ammonia], mitochondrial OS=Homo sapiens OX=9606 GN=CPS1 PE=1 SV=2	3.66667	5	5	5	1500	164.835	6.74	213.8	75.6	72.2	82.2	83.6	72.7	120.533	79.5	1.51614	0.429828
P08319	ADH4	Alcohol dehydrogenase 4 OS=Homo sapiens OX=9606 GN=ADH4 PE=1 SV=5	11.0526	3	3	3	380	40.196	7.94	214.5	61.6	84.5	67.4	113.5	58.4	120.2	79.7667	1.5069	0.468818
P68871	HBB	Hemoglobin subunit beta OS=Homo sapiens OX=9606 GN=HBB PE=1 SV=2	76.8707	10	21	10	147	15.988	7.28	163.3	108.1	88.1	84.9	78.8	76.8	119.833	80.1667	1.4948	0.154346
P30046	DDT	D-dopachrome decarboxylase OS=Homo sapiens OX=9606 GN=DDT PE=1 SV=3	33.8983	4	7	4	118	12.704	7.3	174.6	88.6	95.2	79.2	89.9	72.4	119.467	80.5	1.48406	0.237778
Q9BS26	ERP44	Endoplasmic reticulum resident protein 44 OS=Homo sapiens OX=9606 GN=ERP44 PE=1 SV=1	6.65025	2	2	2	406	46.941	5.26	88.2	146.8	123.3	78.2	78.1	85.5	119.433	80.6	1.4818	0.0869199
Q86UX7	FERMT3	Fermitin family homolog 3 OS=Homo sapiens OX=9606 GN=FERMT3 PE=1 SV=1	18.2909	11	13	11	667	75.905	6.98	105.6	83.7	168.4	77.7	77.9	86.8	119.233	80.8	1.47566	0.207104
P48059	LIMS1	LIM and senescent cell antigen-like-containing domain protein 1 OS=Homo sapiens OX=9606 GN=LIMS1 PE=1 SV=4	7.07692	2	2	2	325	37.226	8.05	113.8	90.4	153.4	83.9	84.3	74.3	119.2	80.8333	1.47464	0.109127
P61769	B2M	Beta-2-microglobulin OS=Homo sapiens OX=9606 GN=B2M PE=1 SV=1	60.5042	5	9	5	119	13.706	6.52	108.5	152.4	95.7	81	78.8	83.6	118.867	81.1333	1.46508	0.0936272
P62328	TMSB4X	Thymosin beta-4 OS=Homo sapiens OX=9606 GN=TMSB4X PE=1 SV=2	63.6364	4	13	2	44	5.05	5.06	100.9	90.7	164.4	67.9	69.6	106.5	118.667	81.3333	1.45902	0.228329
O43866	CD5L	CD5 antigen-like OS=Homo sapiens OX=9606 GN=CD5L PE=1 SV=1	47.5504	12	20	12	347	38.063	5.47	88.9	130.5	136.5	80.5	89.3	74.4	118.633	81.4	1.45741	0.0751767
P18206	VCL	Vinculin OS=Homo sapiens OX=9606 GN=VCL PE=1 SV=4	39.3298	42	52	42	1134	123.722	5.66	109	86.8	159.1	78.2	80.5	86.4	118.3	81.7	1.44798	0.164241
P07237	P4HB	Protein disulfide-isomerase OS=Homo sapiens OX=9606 GN=P4HB PE=1 SV=3	14.9606	9	11	9	508	57.081	4.87	156.5	95.6	102.4	78.7	86.4	80.4	118.167	81.8333	1.44399	0.134506
P05107	ITGB2	Integrin beta-2 OS=Homo sapiens OX=9606 GN=ITGB2 PE=1 SV=2	1.30039	1	1	1	769	84.726	6.95	94	166.4	93.9	81	77.5	87.2	118.1	81.9	1.442	0.210788
Q5T750	XP32	Skin-specific protein 32 OS=Homo sapiens OX=9606 GN=XP32 PE=1 SV=1	3.2	1	1	1	250	26.219	7.97	107.7	165.7	80.7	89.5	64.8	91.5	118.033	81.9333	1.4406	0.244848
P59666	DEFA3	Neutrophil defensin 3 OS=Homo sapiens OX=9606 GN=DEFA3 PE=1 SV=1	26.5957	3	4	3	94	10.238	5.99	95.9	112.8	144.9	92.7	85.9	67.7	117.867	82.1	1.43565	0.0917433
Q15404	RSU1	Ras suppressor protein 1 OS=Homo sapiens OX=9606 GN=RSU1 PE=1 SV=3	13.7184	3	3	3	277	31.521	8.65	109	86.5	158.2	80	99.1	67.3	117.9	82.1333	1.43547	0.196461
P07998	RNASE1	Ribonuclease pancreatic OS=Homo sapiens OX=9606 GN=RNASE1 PE=1 SV=4	25	3	4	3	156	17.633	8.79	103	164.6	85.5	86.9	78.9	81	117.7	82.2667	1.43071	0.215552
Q86TH1	ADAMTSL2	ADAMTS-like protein 2 OS=Homo sapiens OX=9606 GN=ADAMTSL2 PE=1 SV=1	4.10095	4	4	4	951	104.553	6.42	96.2	156.7	100.1	86.9	74.6	85.5	117.667	82.3333	1.42915	0.150964
P49643	PRIM2	DNA primase large subunit OS=Homo sapiens OX=9606 GN=PRIM2 PE=1 SV=2	1.57171	1	2	1	509	58.769	7.91	153.2	86.8	112.8	77.3	92.6	77.2	117.6	82.3667	1.42776	0.152665
Q08257	CRYZ	Quinone oxidoreductase OS=Homo sapiens OX=9606 GN=CRYZ PE=1 SV=1	5.47112	2	2	2	329	35.185	8.44	162.2	76.3	113	82	79.8	86.8	117.167	82.8667	1.41392	0.241511
Q92854	SEMA4D	Semaphorin-4D OS=Homo sapiens OX=9606 GN=SEMA4D PE=1 SV=1	1.04408	1	1	1	862	96.089	7.96	93.2	130.7	127.2	76.3	88.8	83.7	117.033	82.9333	1.41117	0.0525255
Q86VB7	CD163	Scavenger receptor cysteine-rich type 1 protein M130 OS=Homo sapiens OX=9606 GN=CD163 PE=1 SV=2	20.5882	20	25	20	1156	125.369	5.95	102.9	153.1	93.7	86.3	75.8	88.2	116.567	83.4333	1.39712	0.153742
P16109	SELP	P-selectin OS=Homo sapiens OX=9606 GN=SELP PE=1 SV=3	7.83133	6	7	6	830	90.773	6.6	89.2	140.5	119.6	77.9	83.9	88.8	116.433	83.5333	1.39385	0.0967632
Q14697	GANAB	Neutral alpha-glucosidase AB OS=Homo sapiens OX=9606 GN=GANAB PE=1 SV=3	3.60169	3	3	3	944	106.807	6.14	106.3	140.5	102.4	83.3	80.3	87.2	116.4	83.6	1.39234	0.0555735
O95810	CAVIN2	Caveolae-associated protein 2 OS=Homo sapiens OX=9606 GN=CAVIN2 PE=1 SV=3	10.3529	3	5	3	425	47.145	5.21	89.9	106.5	152.1	50.6	92.4	108.5	116.167	83.8333	1.38569	0.271451
P05090	APOD	Apolipoprotein D OS=Homo sapiens OX=9606 GN=APOD PE=1 SV=1	34.9206	7	22	7	189	21.262	5.15	81.2	120.7	145.8	81.7	96.6	74	115.9	84.1	1.37812	0.185955
P00338	LDHA	L-lactate dehydrogenase A chain OS=Homo sapiens OX=9606 GN=LDHA PE=1 SV=2	21.6867	7	13	7	332	36.665	8.27	145.1	79.6	123	84.9	79.5	87.9	115.9	84.1	1.37812	0.176431
P55145	MANF	Mesencephalic astrocyte-derived neurotrophic factor OS=Homo sapiens OX=9606 GN=MANF PE=1 SV=3	20.3297	3	3	3	182	20.687	8.69	91	117.4	138.9	69.5	78.7	104.4	115.767	84.2	1.3749	0.14293
Q9H1U4	MEGF9	Multiple epidermal growth factor-like domains protein 9 OS=Homo sapiens OX=9606 GN=MEGF9 PE=2 SV=3	3.8206	2	3	2	602	62.943	5.67	91.8	129.2	126	91.3	80.2	81.5	115.667	84.3333	1.37154	0.0658853
P00488	F13A1	Coagulation factor XIII A chain OS=Homo sapiens OX=9606 GN=F13A1 PE=1 SV=4	25.8197	17	30	17	732	83.215	6.09	117.1	81	147.6	88.2	83.8	82.2	115.233	84.7333	1.35995	0.189769
P14618	PKM	Pyruvate kinase PKM OS=Homo sapiens OX=9606 GN=PKM PE=1 SV=4	49.1525	21	27	21	531	57.9	7.84	118.2	85.1	141.1	84.4	85.3	86	114.8	85.2333	1.34689	0.143177
P61970	NUTF2	Nuclear transport factor 2 OS=Homo sapiens OX=9606 GN=NUTF2 PE=1 SV=1	12.5984	1	1	1	127	14.469	5.38	136.6	102.1	105.5	85.7	90.2	79.9	114.733	85.2667	1.34558	0.0606524
P19957	PI3	Elafin OS=Homo sapiens OX=9606 GN=PI3 PE=1 SV=3	6.83761	1	1	1	117	12.261	8.82	93.3	147.1	103.8	83.4	76.2	96.3	114.733	85.3	1.34506	0.167559
Q13790	APOF	Apolipoprotein F OS=Homo sapiens OX=9606 GN=APOF PE=1 SV=2	11.6564	3	4	3	326	35.377	5.64	120.6	139.2	84	88.3	120	47.9	114.6	85.4	1.34192	0.331129
P20742	PZP	Pregnancy zone protein OS=Homo sapiens OX=9606 GN=PZP PE=1 SV=4	30.7018	40	82	32	1482	163.76	6.38	145.1	126.8	71.4	100.6	38.9	117.2	114.433	85.5667	1.33736	0.425023
Q03154	ACY1	Aminoacylase-1 OS=Homo sapiens OX=9606 GN=ACY1 PE=1 SV=1	21.3235	8	9	8	408	45.856	6.18	145.4	85.5	112.1	80.3	90.7	86	114.333	85.6667	1.33463	0.178429
P26038	MSN	Moesin OS=Homo sapiens OX=9606 GN=MSN PE=1 SV=3	40.3813	24	29	19	577	67.778	6.4	116.3	87	139.1	82.7	85.8	89	114.133	85.8333	1.32971	0.135883
Q5T749	KPRP	Keratinocyte proline-rich protein OS=Homo sapiens OX=9606 GN=KPRP PE=1 SV=1	1.89983	1	1	1	579	64.093	8.27	94.9	161.7	85.8	84	63.3	110.2	114.133	85.8333	1.32971	0.361717
P08311	CTSG	Cathepsin G OS=Homo sapiens OX=9606 GN=CTSG PE=1 SV=2	20.3922	4	4	4	255	28.819	11.19	94.5	115.6	131.7	89.7	91.4	77.1	113.933	86.0667	1.32378	0.0754599
P21549	AGXT	Serine--pyruvate aminotransferase OS=Homo sapiens OX=9606 GN=AGXT PE=1 SV=1	6.63265	2	2	2	392	42.982	8.4	160.6	102.4	78.4	89.7	76.5	92.4	113.8	86.2	1.32019	0.329721
O75874	IDH1	Isocitrate dehydrogenase [NADP] cytoplasmic OS=Homo sapiens OX=9606 GN=IDH1 PE=1 SV=2	18.3575	8	9	8	414	46.63	7.01	161.8	77.8	101.7	78.4	92.1	88.2	113.767	86.2333	1.31929	0.33796
Q14847	LASP1	LIM and SH3 domain protein 1 OS=Homo sapiens OX=9606 GN=LASP1 PE=1 SV=2	7.66284	2	3	2	261	29.698	7.05	101.5	112	127.8	69.6	91	98.1	113.767	86.2333	1.31929	0.0744865
P37840	SNCA	Alpha-synuclein OS=Homo sapiens OX=9606 GN=SNCA PE=1 SV=1	6.42857	1	1	1	140	14.451	4.7	102.2	82.2	156.8	62.4	93.5	102.9	113.733	86.2667	1.31839	0.340911
P04080	CSTB	Cystatin-B OS=Homo sapiens OX=9606 GN=CSTB PE=1 SV=2	24.4898	2	3	2	98	11.133	7.56	113.3	132.2	95.5	92.5	73	93.6	113.667	86.3667	1.31609	0.0949052
Q04695	KRT17	Keratin, type I cytoskeletal 17 OS=Homo sapiens OX=9606 GN=KRT17 PE=1 SV=2	15.2778	7	11	2	432	48.076	5.02	98.7	109.1	133	89.8	82.7	86.6	113.6	86.3667	1.31532	0.0582567
P05089	ARG1	Arginase-1 OS=Homo sapiens OX=9606 GN=ARG1 PE=1 SV=2	6.8323	2	2	2	322	34.713	7.21	133.9	97	109.9	84.8	87.5	86.9	113.6	86.4	1.31481	0.066153
Q7Z6B7	SRGAP1	SLIT-ROBO Rho GTPase-activating protein 1 OS=Homo sapiens OX=9606 GN=SRGAP1 PE=1 SV=1	1.10599	1	2	1	1085	124.186	6.83	108.8	105.3	126.4	84.8	106.5	68.1	113.5	86.4667	1.31264	0.104011
P31150	GDI1	Rab GDP dissociation inhibitor alpha OS=Homo sapiens OX=9606 GN=GDI1 PE=1 SV=2	14.9888	4	4	1	447	50.55	5.14	118.4	93.5	127.6	91.4	92.7	76.5	113.167	86.8667	1.30276	0.0829401
Q9BQE3	TUBA1C	Tubulin alpha-1C chain OS=Homo sapiens OX=9606 GN=TUBA1C PE=1 SV=1	16.7038	6	6	6	449	49.863	5.1	98.1	96.2	145	84.7	86.9	89.1	113.1	86.9	1.3015	0.177078
P30101	PDIA3	Protein disulfide-isomerase A3 OS=Homo sapiens OX=9606 GN=PDIA3 PE=1 SV=4	20	11	13	11	505	56.747	6.35	122.3	93.4	123.5	84.3	94	82.5	113.067	86.9333	1.30061	0.0670087
Q06323	PSME1	Proteasome activator complex subunit 1 OS=Homo sapiens OX=9606 GN=PSME1 PE=1 SV=1	4.81928	1	1	1	249	28.705	6.02	132.4	100.7	106.1	99.7	89.1	72.1	113.067	86.9667	1.30011	0.108426
Q96CX2	KCTD12	BTB/POZ domain-containing protein KCTD12 OS=Homo sapiens OX=9606 GN=KCTD12 PE=1 SV=1	2.15385	1	1	1	325	35.679	5.64	133.6	102.8	102.2	82.2	75.9	103.3	112.867	87.1333	1.29533	0.124532
P14780	MMP9	Matrix metalloproteinase-9 OS=Homo sapiens OX=9606 GN=MMP9 PE=1 SV=3	41.7256	23	34	23	707	78.408	6.06	106.5	98.1	133.6	87	95.2	79.7	112.733	87.3	1.29133	0.093613
Q16822	PCK2	Phosphoenolpyruvate carboxykinase [GTP], mitochondrial OS=Homo sapiens OX=9606 GN=PCK2 PE=1 SV=4	7.03125	4	4	4	640	70.654	7.62	167.8	85.1	85.1	91.5	83.6	86.9	112.667	87.3333	1.29008	0.411575
P69905	HBA1	Hemoglobin subunit alpha OS=Homo sapiens OX=9606 GN=HBA1 PE=1 SV=2	45.7746	5	11	5	142	15.248	8.68	148.3	101.2	88.3	99.2	63.4	99.7	112.6	87.4333	1.28784	0.313338
Q14019	COTL1	Coactosin-like protein OS=Homo sapiens OX=9606 GN=COTL1 PE=1 SV=3	26.0563	5	6	5	142	15.935	5.67	98.3	115.8	123.5	72	85.4	105.1	112.533	87.5	1.2861	0.108725
O14791	APOL1	Apolipoprotein L1 OS=Homo sapiens OX=9606 GN=APOL1 PE=1 SV=5	36.4322	12	17	12	398	43.947	5.81	100.5	127	108.6	95.6	91.7	76.6	112.033	87.9667	1.27359	0.0690411
P51149	RAB7A	Ras-related protein Rab-7a OS=Homo sapiens OX=9606 GN=RAB7A PE=1 SV=1	11.5942	2	2	2	207	23.475	6.7	108	91.1	137	79.9	94.3	89.7	112.033	87.9667	1.27359	0.162101
Q6UWP8	SBSN	Suprabasin OS=Homo sapiens OX=9606 GN=SBSN PE=1 SV=2	13.3898	3	4	3	590	60.505	7.01	95.4	126.3	113.7	94.7	79.3	90.5	111.8	88.1667	1.26805	0.0789701
Q13228	SELENBP1	Methanethiol oxidase OS=Homo sapiens OX=9606 GN=SELENBP1 PE=1 SV=2	30.2966	11	12	11	472	52.358	6.37	144.5	97.3	92.7	86.4	91.9	87.2	111.5	88.5	1.25989	0.239123
P09211	GSTP1	Glutathione S-transferase P OS=Homo sapiens OX=9606 GN=GSTP1 PE=1 SV=2	16.6667	2	4	2	210	23.341	5.64	121.9	97.7	114.5	96.3	82.3	87.2	111.367	88.6	1.25696	0.0508904
Q9NYL9	TMOD3	Tropomodulin-3 OS=Homo sapiens OX=9606 GN=TMOD3 PE=1 SV=1	3.97727	1	1	1	352	39.57	5.19	99.2	137.7	96.6	83	86.4	97	111.167	88.8	1.25188	0.183889
P07307	ASGR2	Asialoglycoprotein receptor 2 OS=Homo sapiens OX=9606 GN=ASGR2 PE=1 SV=2	13.8264	5	6	5	311	35.07	6.25	97.4	143.8	92.3	88	92.5	86	111.167	88.8333	1.25141	0.247204
Q9UHG3	PCYOX1	Prenylcysteine oxidase 1 OS=Homo sapiens OX=9606 GN=PCYOX1 PE=1 SV=3	37.8218	15	22	15	505	56.604	6.18	110.7	102.2	120.4	86.6	111	69.1	111.1	88.9	1.24972	0.168871
Q02818	NUCB1	Nucleobindin-1 OS=Homo sapiens OX=9606 GN=NUCB1 PE=1 SV=4	17.5705	6	7	6	461	53.846	5.25	102.9	126	104.3	94.9	81.5	90.5	111.067	88.9667	1.24841	0.0591565
Q8TAA3	PSMA8	Proteasome subunit alpha-type 8 OS=Homo sapiens OX=9606 GN=PSMA8 PE=2 SV=3	9.76562	2	3	2	256	28.512	8.98	135	100.6	97.3	99.7	79.8	87.7	110.967	89.0667	1.24588	0.176783
P23526	AHCY	Adenosylhomocysteinase OS=Homo sapiens OX=9606 GN=AHCY PE=1 SV=4	5.09259	2	2	2	432	47.685	6.34	135.3	99.9	97.3	95.8	86.4	85.3	110.833	89.1667	1.24299	0.163226
P62826	RAN	GTP-binding nuclear protein Ran OS=Homo sapiens OX=9606 GN=RAN PE=1 SV=3	6.01852	1	1	1	216	24.408	7.49	125.1	100.2	107.1	95.9	83.9	87.8	110.8	89.2	1.24215	0.0583381
P80188	LCN2	Neutrophil gelatinase-associated lipocalin OS=Homo sapiens OX=9606 GN=LCN2 PE=1 SV=2	40.404	6	14	6	198	22.574	8.91	96.9	89.1	146.1	89.3	109	69.6	110.7	89.3	1.23964	0.369048
Q13772	NCOA4	Nuclear receptor coactivator 4 OS=Homo sapiens OX=9606 GN=NCOA4 PE=1 SV=1	1.14007	1	2	1	614	69.682	6.01	118.4	134.6	79.1	91.3	77	99.6	110.7	89.3	1.23964	0.294406
Q9UM47	NOTCH3	Neurogenic locus notch homolog protein 3 OS=Homo sapiens OX=9606 GN=NOTCH3 PE=1 SV=2	0.387764	1	1	1	2321	243.468	5.39	97.9	124.9	109.1	95.5	77.3	95.3	110.633	89.3667	1.23797	0.097862
P58546	MTPN	Myotrophin OS=Homo sapiens OX=9606 GN=MTPN PE=1 SV=2	22.8814	3	3	3	118	12.887	5.52	99.4	106.4	126	85.8	92.6	89.7	110.6	89.3667	1.2376	0.0607381
Q8N149	LILRA2	Leukocyte immunoglobulin-like receptor subfamily A member 2 OS=Homo sapiens OX=9606 GN=LILRA2 PE=1 SV=2	4.7619	2	2	2	483	52.959	6.92	100.6	130.5	100.5	92.7	83.9	91.7	110.533	89.4333	1.23593	0.111455
P0C0L4	C4A	Complement C4-A OS=Homo sapiens OX=9606 GN=C4A PE=1 SV=2	63.3601	91	927	4	1744	192.664	7.08	111.9	122.7	96.8	100.7	79.4	88.4	110.467	89.5	1.23426	0.0972657
Q15166	PON3	Serum paraoxonase/lactonase 3 OS=Homo sapiens OX=9606 GN=PON3 PE=1 SV=3	6.49718	3	5	1	354	39.582	5.41	105.2	102.4	123.4	81.9	98.2	88.8	110.333	89.6333	1.23094	0.0629885
P28066	PSMA5	Proteasome subunit alpha type-5 OS=Homo sapiens OX=9606 GN=PSMA5 PE=1 SV=3	18.6722	4	6	4	241	26.394	4.79	133.3	92.2	104.9	90.1	87.1	92.4	110.133	89.8667	1.22552	0.173279
Q5SQ64	LY6G6F	Lymphocyte antigen 6 complex locus protein G6f OS=Homo sapiens OX=9606 GN=LY6G6F PE=1 SV=2	2.6936	1	2	1	297	32.444	8.56	86.4	147.4	95.6	65.4	97.9	107.3	109.8	90.2	1.21729	0.439172
P20618	PSMB1	Proteasome subunit beta type-1 OS=Homo sapiens OX=9606 GN=PSMB1 PE=1 SV=2	14.1079	2	3	2	241	26.472	8.13	124.6	103.7	100.9	96.2	86.2	88.3	109.733	90.2333	1.21611	0.0731246
Q9P121	NTM	Neurotrimin OS=Homo sapiens OX=9606 GN=NTM PE=1 SV=1	4.94186	2	2	2	344	37.947	7.81	109.8	121	97.4	98.6	80.6	92.6	109.4	90.6	1.20751	0.0948725
P31995	FCGR2C	Low affinity immunoglobulin gamma Fc region receptor II-c OS=Homo sapiens OX=9606 GN=FCGR2C PE=1 SV=1	2.78638	1	1	1	323	35.556	6.9	85.8	136.1	106	99.2	87.8	85.1	109.3	90.7	1.20507	0.289291
Q00610	CLTC	Clathrin heavy chain 1 OS=Homo sapiens OX=9606 GN=CLTC PE=1 SV=5	0.835821	1	1	1	1675	191.493	5.69	113.5	96.6	117.6	84.3	92.8	95.1	109.233	90.7333	1.20389	0.0624197
P21291	CSRP1	Cysteine and glycine-rich protein 1 OS=Homo sapiens OX=9606 GN=CSRP1 PE=1 SV=3	8.80829	1	1	1	193	20.554	8.57	76.1	116.6	134.9	53.8	100.3	118.3	109.2	90.8	1.20264	0.516741
P04075	ALDOA	Fructose-bisphosphate aldolase A OS=Homo sapiens OX=9606 GN=ALDOA PE=1 SV=2	38.4615	11	14	10	364	39.395	8.09	121	88.6	117.7	87.8	89.2	95.7	109.1	90.9	1.20022	0.160445
P24043	LAMA2	Laminin subunit alpha-2 OS=Homo sapiens OX=9606 GN=LAMA2 PE=1 SV=4	0.704676	2	2	2	3122	343.684	6.4	94.4	123.8	109	96.4	86.5	90	109.067	90.9667	1.19897	0.113731
P13716	ALAD	Delta-aminolevulinic acid dehydratase OS=Homo sapiens OX=9606 GN=ALAD PE=1 SV=1	10.303	2	2	2	330	36.271	6.79	115.7	105.7	105.4	101.9	84	87.3	108.933	91.0667	1.19619	0.0505009
P13727	PRG2	Bone marrow proteoglycan OS=Homo sapiens OX=9606 GN=PRG2 PE=1 SV=2	9.45946	2	3	2	222	25.189	6.76	90.9	125.2	110.4	83.8	92.3	97.4	108.833	91.1667	1.19378	0.173915
O95428	PAPLN	Papilin OS=Homo sapiens OX=9606 GN=PAPLN PE=2 SV=4	2.50391	3	3	3	1278	137.612	6.89	98.8	115.3	112.1	89.3	85.4	99.1	108.733	91.2667	1.19138	0.0545992
Q562R1	ACTBL2	Beta-actin-like protein 2 OS=Homo sapiens OX=9606 GN=ACTBL2 PE=1 SV=2	15.1596	5	29	2	376	41.976	5.59	110.4	89.6	126.2	94	85.8	94	108.733	91.2667	1.19138	0.185757
P00451	F8	Coagulation factor VIII OS=Homo sapiens OX=9606 GN=F8 PE=1 SV=1	1.27605	3	4	3	2351	266.841	7.36	99.7	111.1	115.2	85.2	93.3	95.4	108.667	91.3	1.19022	0.035852
P17174	GOT1	Aspartate aminotransferase, cytoplasmic OS=Homo sapiens OX=9606 GN=GOT1 PE=1 SV=3	18.1598	6	6	6	413	46.219	7.01	151.2	82.3	92.4	94.9	89.6	89.6	108.633	91.3667	1.18898	0.467976
Q7Z7M0	MEGF8	Multiple epidermal growth factor-like domains protein 8 OS=Homo sapiens OX=9606 GN=MEGF8 PE=1 SV=2	3.40949	9	11	9	2845	302.901	6.87	110.3	112.5	102.8	91.9	92.2	90.3	108.533	91.4667	1.18659	0.00468548
P00568	AK1	Adenylate kinase isoenzyme 1 OS=Homo sapiens OX=9606 GN=AK1 PE=1 SV=3	23.7113	4	4	4	194	21.621	8.63	113.7	110.4	101.5	85.2	92.9	96.3	108.533	91.4667	1.18659	0.025359
Q9UBP4	DKK3	Dickkopf-related protein 3 OS=Homo sapiens OX=9606 GN=DKK3 PE=1 SV=2	4.57143	1	1	1	350	38.365	4.65	120.1	115.7	89.7	112.3	81.4	80.8	108.5	91.5	1.18579	0.293706
P25787	PSMA2	Proteasome subunit alpha type-2 OS=Homo sapiens OX=9606 GN=PSMA2 PE=1 SV=2	17.094	2	2	2	234	25.882	7.43	133	94.1	98.1	92.9	89.6	92.3	108.4	91.6	1.18341	0.246798
Q15113	PCOLCE	Procollagen C-endopeptidase enhancer 1 OS=Homo sapiens OX=9606 GN=PCOLCE PE=1 SV=2	30.735	10	16	10	449	47.942	7.43	103	131.3	90.8	92.9	92.4	89.5	108.367	91.6	1.18304	0.236229
Q15907	RAB11B	Ras-related protein Rab-11B OS=Homo sapiens OX=9606 GN=RAB11B PE=1 SV=4	14.6789	3	3	3	218	24.473	5.94	116.7	108.8	99.4	67.2	100	107.8	108.3	91.6667	1.18145	0.28251
P30086	PEBP1	Phosphatidylethanolamine-binding protein 1 OS=Homo sapiens OX=9606 GN=PEBP1 PE=1 SV=3	44.385	6	8	6	187	21.044	7.53	145	89.4	90.5	68.5	81.8	124.8	108.3	91.7	1.18103	0.543151
P13987	CD59	CD59 glycoprotein OS=Homo sapiens OX=9606 GN=CD59 PE=1 SV=1	17.1875	2	2	2	128	14.168	6.48	92.7	146.9	84.8	92.4	89.1	94.2	108.133	91.9	1.17664	0.453541
Q92954	PRG4	Proteoglycan 4 OS=Homo sapiens OX=9606 GN=PRG4 PE=1 SV=3	21.6524	29	50	29	1404	150.968	9.51	102	97.5	124.7	83.9	100.3	91.6	108.067	91.9333	1.17549	0.170182
Q9HCN6	GP6	Platelet glycoprotein VI OS=Homo sapiens OX=9606 GN=GP6 PE=1 SV=4	10.3245	3	4	3	339	36.843	9.2	99.9	118.9	104.3	82.1	94.2	100.6	107.7	92.3	1.16685	0.123017
P30043	BLVRB	Flavin reductase (NADPH) OS=Homo sapiens OX=9606 GN=BLVRB PE=1 SV=3	31.5534	5	10	5	206	22.105	7.65	121.8	102.7	98.5	92.7	95.2	89.1	107.667	92.3333	1.16606	0.106479
P11684	SCGB1A1	Uteroglobin OS=Homo sapiens OX=9606 GN=SCGB1A1 PE=1 SV=1	18.6813	2	2	2	91	9.987	5.06	81	146.7	95.2	89.7	96.5	90.9	107.633	92.3667	1.16528	0.489195
P04156	PRNP	Major prion protein OS=Homo sapiens OX=9606 GN=PRNP PE=1 SV=1	8.3004	2	2	2	253	27.643	9	101.5	127.1	93.9	98.9	89.1	89.5	107.5	92.5	1.16216	0.227806
Q8TER0	SNED1	Sushi, nidogen and EGF-like domain-containing protein 1 OS=Homo sapiens OX=9606 GN=SNED1 PE=2 SV=2	1.27389	2	2	2	1413	152.104	6.98	87.6	130.6	104.2	96	90.4	91.4	107.467	92.6	1.16055	0.304691
O00151	PDLIM1	PDZ and LIM domain protein 1 OS=Homo sapiens OX=9606 GN=PDLIM1 PE=1 SV=4	26.4438	7	7	7	329	36.049	7.02	77.1	113.3	130.1	74.6	97.6	107.3	106.833	93.1667	1.14669	0.498882
P07384	CAPN1	Calpain-1 catalytic subunit OS=Homo sapiens OX=9606 GN=CAPN1 PE=1 SV=1	3.92157	2	2	2	714	81.838	5.67	112.8	101.3	106.2	103.5	85.7	90.5	106.767	93.2333	1.14516	0.0972373
P35916	FLT4	Vascular endothelial growth factor receptor 3 OS=Homo sapiens OX=9606 GN=FLT4 PE=1 SV=3	8.21717	8	8	8	1363	152.66	6.3	96.5	116.2	107.5	88.7	102.6	88.4	106.733	93.2333	1.1448	0.14125
Q9H3S1	SEMA4A	Semaphorin-4A OS=Homo sapiens OX=9606 GN=SEMA4A PE=1 SV=2	1.18265	1	1	1	761	83.52	6.84	94.1	100.8	125.1	99.4	94.9	85.6	106.667	93.3	1.14327	0.262451
P00390	GSR	Glutathione reductase, mitochondrial OS=Homo sapiens OX=9606 GN=GSR PE=1 SV=2	18.7739	7	8	7	522	56.221	8.5	110.8	114.6	94.6	91	90.1	99	106.667	93.3667	1.14245	0.120247
O15031	PLXNB2	Plexin-B2 OS=Homo sapiens OX=9606 GN=PLXNB2 PE=1 SV=3	2.17628	3	3	3	1838	204.997	6.24	98.8	118.4	102.7	96.2	99.5	84.4	106.633	93.3667	1.14209	0.153409
Q16627	CCL14	C-C motif chemokine 14 OS=Homo sapiens OX=9606 GN=CCL14 PE=1 SV=1	19.3548	2	2	2	93	10.671	8.72	113	108	98.6	89.3	97	94.1	106.533	93.4667	1.1398	0.0522819
P09960	LTA4H	Leukotriene A-4 hydrolase OS=Homo sapiens OX=9606 GN=LTA4H PE=1 SV=2	14.5663	9	11	9	611	69.241	6.18	136.9	75	107.7	96.7	87.9	95.9	106.533	93.5	1.13939	0.511265
Q9NS71	GKN1	Gastrokine-1 OS=Homo sapiens OX=9606 GN=GKN1 PE=2 SV=3	4.0201	1	1	1	199	21.985	6.32	100.3	134.4	84.7	90	93.8	96.8	106.467	93.5333	1.13828	0.431687
O14950	MYL12B	Myosin regulatory light chain 12B OS=Homo sapiens OX=9606 GN=MYL12B PE=1 SV=2	16.8605	2	2	2	172	19.767	4.84	93.5	72.8	152.9	95.4	94.3	91.1	106.4	93.6	1.13675	0.622623
P10412	HIST1H1E	Histone H1.4 OS=Homo sapiens OX=9606 GN=HIST1H1E PE=1 SV=2	7.30594	1	1	1	219	21.852	11.03	116.8	92.7	109.6	85.8	91.1	104.1	106.367	93.6667	1.13559	0.230018
O00187	MASP2	Mannan-binding lectin serine protease 2 OS=Homo sapiens OX=9606 GN=MASP2 PE=1 SV=4	29.7376	16	20	16	686	75.654	5.63	107.8	112.3	98.8	88.3	99	93.8	106.3	93.7	1.13447	0.0663864
P61981	YWHAG	14-3-3 protein gamma OS=Homo sapiens OX=9606 GN=YWHAG PE=1 SV=2	18.2186	5	7	1	247	28.285	4.89	95.7	98.2	124.6	99.7	83.1	98.6	106.167	93.8	1.13184	0.311561
Q8WUD1	RAB2B	Ras-related protein Rab-2B OS=Homo sapiens OX=9606 GN=RAB2B PE=1 SV=1	5.09259	1	1	1	216	24.199	7.83	105.5	112.8	100.2	93	97.2	91.2	106.167	93.8	1.13184	0.0382386
P37802	TAGLN2	Transgelin-2 OS=Homo sapiens OX=9606 GN=TAGLN2 PE=1 SV=3	51.7588	9	14	9	199	22.377	8.25	75.9	112.9	129.7	62.9	108.5	110.1	106.167	93.8333	1.13144	0.607814
Q9HBR0	SLC38A10	Putative sodium-coupled neutral amino acid transporter 10 OS=Homo sapiens OX=9606 GN=SLC38A10 PE=1 SV=2	6.16622	5	5	5	1119	119.687	5.73	90.4	110.2	117.9	97.7	88	95.8	106.167	93.8333	1.13144	0.229794
Q04446	GBE1	1,4-alpha-glucan-branching enzyme OS=Homo sapiens OX=9606 GN=GBE1 PE=1 SV=3	1.1396	1	1	1	702	80.423	6.32	145.9	79.7	92.8	98.4	88.3	94.9	106.133	93.8667	1.13068	0.581032
P61077	UBE2D3	Ubiquitin-conjugating enzyme E2 D3 OS=Homo sapiens OX=9606 GN=UBE2D3 PE=1 SV=1	7.48299	1	2	1	147	16.676	7.8	87.2	142.8	88.3	105.9	87.6	88.3	106.1	93.9333	1.12952	0.562743
Q99592	ZBTB18	Zinc finger and BTB domain-containing protein 18 OS=Homo sapiens OX=9606 GN=ZBTB18 PE=1 SV=1	2.29885	1	2	1	522	58.317	5.69	95.7	97.7	124.6	100.2	99.9	82	106	94.0333	1.12726	0.341364
P19440	GGT1	Glutathione hydrolase 1 proenzyme OS=Homo sapiens OX=9606 GN=GGT1 PE=1 SV=2	4.74517	2	2	2	569	61.372	7.12	117.2	98.6	102	98.8	93.6	89.8	105.933	94.0667	1.12615	0.132045
Q9HBI1	PARVB	Beta-parvin OS=Homo sapiens OX=9606 GN=PARVB PE=1 SV=1	3.84615	1	1	1	364	41.688	6.73	94.6	94.9	128.2	95.1	94.6	92.5	105.9	94.0667	1.1258	0.349491
P46939	UTRN	Utrophin OS=Homo sapiens OX=9606 GN=UTRN PE=1 SV=2	0.203903	1	1	1	3433	394.22	5.33	125	82.9	109.7	97.6	98.7	86.2	105.867	94.1667	1.12425	0.416907
Q9H0U4	RAB1B	Ras-related protein Rab-1B OS=Homo sapiens OX=9606 GN=RAB1B PE=1 SV=1	31.8408	6	6	5	201	22.157	5.73	102	109.5	105.8	80.7	106.4	95.6	105.767	94.2333	1.12239	0.211338
Q9H299	SH3BGRL3	SH3 domain-binding glutamic acid-rich-like protein 3 OS=Homo sapiens OX=9606 GN=SH3BGRL3 PE=1 SV=1	38.7097	4	6	4	93	10.431	4.93	95	117.7	104.6	75.7	93.3	113.8	105.767	94.2667	1.12199	0.420577
P04070	PROC	Vitamin K-dependent protein C OS=Homo sapiens OX=9606 GN=PROC PE=1 SV=1	28.8503	11	23	11	461	52.037	6.28	108.4	97.8	110.8	92.8	97.1	93	105.667	94.3	1.12054	0.0549117
P01024	C3	Complement C3 OS=Homo sapiens OX=9606 GN=C3 PE=1 SV=2	61.2748	87	336	87	1663	187.03	6.4	140	87.1	89.7	93.8	91.1	98.3	105.6	94.4	1.11864	0.553614
P15088	CPA3	Mast cell carboxypeptidase A OS=Homo sapiens OX=9606 GN=CPA3 PE=1 SV=2	1.91847	1	1	1	417	48.639	9	109.7	106	101	97.6	104.2	81.4	105.567	94.4	1.11829	0.197221
P07437	TUBB	Tubulin beta chain OS=Homo sapiens OX=9606 GN=TUBB PE=1 SV=2	3.82883	1	1	1	444	49.639	4.89	131.3	91.4	93.8	106.1	91.9	85.6	105.5	94.5333	1.11601	0.485055
P26572	MGAT1	Alpha-1,3-mannosyl-glycoprotein 2-beta-N-acetylglucosaminyltransferase OS=Homo sapiens OX=9606 GN=MGAT1 PE=1 SV=2	2.47191	1	1	1	445	50.846	9.16	100.9	125.8	89.5	94.5	96.2	93.1	105.4	94.6	1.11416	0.372115
Q14974	KPNB1	Importin subunit beta-1 OS=Homo sapiens OX=9606 GN=KPNB1 PE=1 SV=2	1.48402	1	1	1	876	97.108	4.78	89.1	115.7	111.4	126.2	60.7	96.9	105.4	94.6	1.11416	0.628755
Q8NBP7	PCSK9	Proprotein convertase subtilisin/kexin type 9 OS=Homo sapiens OX=9606 GN=PCSK9 PE=1 SV=3	15.3179	10	13	10	692	74.239	6.61	112.1	109.9	94	93.6	96.2	94.2	105.333	94.6667	1.11268	0.137492
Q15942	ZYX	Zyxin OS=Homo sapiens OX=9606 GN=ZYX PE=1 SV=1	5.76923	3	4	3	572	61.238	6.67	99.3	84.8	131.9	78.5	80.3	125.2	105.333	94.6667	1.11268	0.63306
P61916	NPC2	NPC intracellular cholesterol transporter 2 OS=Homo sapiens OX=9606 GN=NPC2 PE=1 SV=1	16.5563	2	2	2	151	16.559	7.65	104.5	115.7	95.7	94.8	100.3	89.1	105.3	94.7333	1.11154	0.186176
P21399	ACO1	Cytoplasmic aconitate hydratase OS=Homo sapiens OX=9606 GN=ACO1 PE=1 SV=3	4.38695	4	4	4	889	98.337	6.68	127.3	100.1	88.4	106	86.8	91.5	105.267	94.7667	1.1108	0.461039
Q7Z4W1	DCXR	L-xylulose reductase OS=Homo sapiens OX=9606 GN=DCXR PE=1 SV=2	4.09836	1	1	1	244	25.897	8.1	157.8	78.1	79.8	84.7	124.3	75.3	105.233	94.7667	1.11045	0.746957
O43505	B4GAT1	Beta-1,4-glucuronyltransferase 1 OS=Homo sapiens OX=9606 GN=B4GAT1 PE=1 SV=1	12.7711	4	6	4	415	47.089	7.2	98.3	113.5	103.8	97	87.7	99.7	105.2	94.8	1.1097	0.144264
A1L4H1	SSC5D	Soluble scavenger receptor cysteine-rich domain-containing protein SSC5D OS=Homo sapiens OX=9606 GN=SSC5D PE=1 SV=3	4.64081	5	5	5	1573	165.639	6.13	105.2	108	101.9	96.3	94.6	94	105.033	94.9667	1.106	0.00601063
P61604	HSPE1	10 kDa heat shock protein, mitochondrial OS=Homo sapiens OX=9606 GN=HSPE1 PE=1 SV=2	13.7255	1	1	1	102	10.925	8.92	110.7	95.8	108.4	99.1	90.6	95.4	104.967	95.0333	1.10452	0.131123
Q9HBB8	CDHR5	Cadherin-related family member 5 OS=Homo sapiens OX=9606 GN=CDHR5 PE=1 SV=3	7.81065	4	4	4	845	88.169	4.93	102.8	110.1	101.7	90.5	100.3	94.6	104.867	95.1333	1.10231	0.0659675
Q13093	PLA2G7	Platelet-activating factor acetylhydrolase OS=Homo sapiens OX=9606 GN=PLA2G7 PE=1 SV=1	20.6349	8	10	8	441	50.045	7.56	97.1	100.1	117.3	91.9	117	76.5	104.833	95.1333	1.10196	0.50848
P14625	HSP90B1	Endoplasmin OS=Homo sapiens OX=9606 GN=HSP90B1 PE=1 SV=1	29.1407	21	25	21	803	92.411	4.84	118.4	102.8	93.4	87.1	100.5	97.9	104.867	95.1667	1.10193	0.310744
P30084	ECHS1	Enoyl-CoA hydratase, mitochondrial OS=Homo sapiens OX=9606 GN=ECHS1 PE=1 SV=4	7.24138	1	1	1	290	31.367	8.07	102.7	117.9	93.4	114.4	88.6	83	104.667	95.3333	1.0979	0.480828
O00584	RNASET2	Ribonuclease T2 OS=Homo sapiens OX=9606 GN=RNASET2 PE=1 SV=2	3.90625	1	1	1	256	29.462	7.08	93.4	122.5	98	105.9	95.4	84.8	104.633	95.3667	1.09717	0.442884
Q05315	CLC	Galectin-10 OS=Homo sapiens OX=9606 GN=CLC PE=1 SV=3	20.4225	2	2	2	142	16.442	7.37	135.3	73.8	104.6	88.5	99.3	98.5	104.567	95.4333	1.0957	0.640193
Q9BZQ8	FAM129A	Protein Niban OS=Homo sapiens OX=9606 GN=FAM129A PE=1 SV=1	1.2931	1	1	1	928	103.07	4.78	90.7	112.2	110.8	99.9	89.2	97.2	104.567	95.4333	1.0957	0.298598
P61204	ARF3	ADP-ribosylation factor 3 OS=Homo sapiens OX=9606 GN=ARF3 PE=1 SV=2	23.7569	4	6	4	181	20.588	7.43	90.2	102.7	120.8	81.4	104.5	100.5	104.567	95.4667	1.09532	0.469025
P55058	PLTP	Phospholipid transfer protein OS=Homo sapiens OX=9606 GN=PLTP PE=1 SV=1	19.6755	7	11	7	493	54.705	7.01	89.5	113.9	110.2	95.6	93.7	97.1	104.533	95.4667	1.09497	0.301854
P61513	RPL37A	60S ribosomal protein L37a OS=Homo sapiens OX=9606 GN=RPL37A PE=1 SV=2	19.5652	1	1	1	92	10.268	10.43	107.9	106.6	99	99.5	85.8	101.3	104.5	95.5333	1.09386	0.186239
O75356	ENTPD5	Ectonucleoside triphosphate diphosphohydrolase 5 OS=Homo sapiens OX=9606 GN=ENTPD5 PE=1 SV=1	7.71028	2	2	2	428	47.487	6.33	106.6	108.4	98.3	99.3	91.6	95.8	104.433	95.5667	1.09278	0.0812953
P03951	F11	Coagulation factor XI OS=Homo sapiens OX=9606 GN=F11 PE=1 SV=1	51.2	29	49	28	625	70.064	8.1	105.3	117.6	90.1	103.1	79.3	104.5	104.333	95.6333	1.09097	0.488134
Q99439	CNN2	Calponin-2 OS=Homo sapiens OX=9606 GN=CNN2 PE=1 SV=4	6.14887	2	2	2	309	33.675	7.33	89.8	125.9	97.4	67.7	104.3	115	104.367	95.6667	1.09094	0.654999
P12109	COL6A1	Collagen alpha-1(VI) chain OS=Homo sapiens OX=9606 GN=COL6A1 PE=1 SV=3	10.1167	10	12	10	1028	108.462	5.43	96.9	115.6	100.4	103.2	83.2	100.5	104.3	95.6333	1.09062	0.36541
P04275	VWF	von Willebrand factor OS=Homo sapiens OX=9606 GN=VWF PE=1 SV=4	36.9712	85	134	85	2813	309.058	5.48	87.3	109.2	116.4	90	92.7	104.4	104.3	95.7	1.08986	0.429868
Q9UBG0	MRC2	C-type mannose receptor 2 OS=Homo sapiens OX=9606 GN=MRC2 PE=1 SV=2	2.09601	2	2	2	1479	166.568	5.83	102.9	106.9	103	95.9	85.7	105.5	104.267	95.7	1.08952	0.217993
P02753	RBP4	Retinol-binding protein 4 OS=Homo sapiens OX=9606 GN=RBP4 PE=1 SV=3	77.1144	14	223	14	201	22.995	6.07	102.3	117	93.3	84.1	115.7	87.7	104.2	95.8333	1.0873	0.528712
Q6IBS0	TWF2	Twinfilin-2 OS=Homo sapiens OX=9606 GN=TWF2 PE=1 SV=2	4.58453	1	1	1	349	39.523	6.84	93.1	104.8	114.7	80.4	100.2	106.9	104.2	95.8333	1.0873	0.454526
P22894	MMP8	Neutrophil collagenase OS=Homo sapiens OX=9606 GN=MMP8 PE=1 SV=1	10.0642	4	4	4	467	53.378	6.87	96.4	99.7	116.4	104.2	100.3	83	104.167	95.8333	1.08696	0.406263
P05186	ALPL	Alkaline phosphatase, tissue-nonspecific isozyme OS=Homo sapiens OX=9606 GN=ALPL PE=1 SV=4	5.53435	3	3	3	524	57.269	6.67	104.8	112.5	95.2	92.3	99.8	95.4	104.167	95.8333	1.08696	0.201429
P07858	CTSB	Cathepsin B OS=Homo sapiens OX=9606 GN=CTSB PE=1 SV=3	3.24484	1	1	1	339	37.797	6.3	102.9	110	99.2	99.8	84.1	104.1	104.033	96	1.08368	0.306247
Q15828	CST6	Cystatin-M OS=Homo sapiens OX=9606 GN=CST6 PE=1 SV=1	28.1879	3	3	3	149	16.5	8.09	82.7	138.9	90.3	111	89.8	87.3	103.967	96.0333	1.08261	0.69981
Q12907	LMAN2	Vesicular integral-membrane protein VIP36 OS=Homo sapiens OX=9606 GN=LMAN2 PE=1 SV=1	5.89888	2	2	2	356	40.203	6.95	105.2	115.4	91.3	99	101.2	87.9	103.967	96.0333	1.08261	0.383193
P01034	CST3	Cystatin-C OS=Homo sapiens OX=9606 GN=CST3 PE=1 SV=1	47.9452	6	29	6	146	15.789	8.75	95.4	132.6	83.6	94	98.9	95.5	103.867	96.1333	1.08044	0.629716
Q9H4G4	GLIPR2	Golgi-associated plant pathogenesis-related protein 1 OS=Homo sapiens OX=9606 GN=GLIPR2 PE=1 SV=3	38.3117	4	4	4	154	17.208	9.41	103.4	102.2	105.7	86.4	96.9	105.5	103.767	96.2667	1.07791	0.252752
O60462	NRP2	Neuropilin-2 OS=Homo sapiens OX=9606 GN=NRP2 PE=1 SV=3	4.51128	4	4	4	931	104.764	5.17	91.4	101.1	118.5	91.9	99.4	97.7	103.667	96.3333	1.07612	0.4241
P0DOX5		Immunoglobulin gamma-1 heavy chain OS=Homo sapiens OX=9606 PE=1 SV=2	20.7127	8	9	3	449	49.298	8.72	129.5	82.1	99.4	95.7	92.7	100.7	103.667	96.3667	1.07575	0.630639
P18065	IGFBP2	Insulin-like growth factor-binding protein 2 OS=Homo sapiens OX=9606 GN=IGFBP2 PE=1 SV=2	28.3077	7	8	7	325	34.791	7.5	109.7	99.7	101.3	100.6	102.9	85.8	103.567	96.4333	1.07397	0.313395
P30520	ADSS	Adenylosuccinate synthetase isozyme 2 OS=Homo sapiens OX=9606 GN=ADSS PE=1 SV=3	3.07018	1	1	1	456	50.066	6.55	114.6	102.4	93.6	106.4	93	89.9	103.533	96.4333	1.07363	0.42061
P11597	CETP	Cholesteryl ester transfer protein OS=Homo sapiens OX=9606 GN=CETP PE=1 SV=2	4.46247	2	2	2	493	54.721	6.09	87.3	94.7	128.5	87.9	101.4	100.1	103.5	96.4667	1.07291	0.627175
P16930	FAH	Fumarylacetoacetase OS=Homo sapiens OX=9606 GN=FAH PE=1 SV=2	14.7971	6	8	6	419	46.344	6.95	123.6	91.3	95.6	101.4	90.5	97.6	103.5	96.5	1.07254	0.54576
Q9P232	CNTN3	Contactin-3 OS=Homo sapiens OX=9606 GN=CNTN3 PE=1 SV=3	0.972763	1	1	1	1028	112.812	6.3	94.3	100.2	115.7	97	111.3	81.5	103.4	96.6	1.07039	0.560085
P26641	EEF1G	Elongation factor 1-gamma OS=Homo sapiens OX=9606 GN=EEF1G PE=1 SV=3	5.49199	2	2	2	437	50.087	6.67	96.4	106	107.7	78.1	106.9	104.8	103.367	96.6	1.07005	0.532412
P05362	ICAM1	Intercellular adhesion molecule 1 OS=Homo sapiens OX=9606 GN=ICAM1 PE=1 SV=2	16.3534	7	10	7	532	57.789	7.99	106.4	106.1	97.6	102.5	94.6	92.9	103.367	96.6667	1.06931	0.180185
Q9UBX1	CTSF	Cathepsin F OS=Homo sapiens OX=9606 GN=CTSF PE=1 SV=1	6.81818	4	4	4	484	53.332	8.22	126.5	93.2	90.4	98.1	91.8	100.2	103.367	96.7	1.06894	0.604232
Q9H4M9	EHD1	EH domain-containing protein 1 OS=Homo sapiens OX=9606 GN=EHD1 PE=1 SV=2	5.61798	2	2	2	534	60.589	6.83	76.3	122.4	111.2	65.3	108.7	116.1	103.3	96.7	1.06825	0.769704
Q96PD2	DCBLD2	Discoidin, CUB and LCCL domain-containing protein 2 OS=Homo sapiens OX=9606 GN=DCBLD2 PE=1 SV=1	4	2	2	2	775	84.981	7.17	108.7	115.8	84.9	113.3	81.2	96.2	103.133	96.9	1.06433	0.660545
Q16775	HAGH	Hydroxyacylglutathione hydrolase, mitochondrial OS=Homo sapiens OX=9606 GN=HAGH PE=1 SV=2	2.5974	1	1	1	308	33.784	8.12	118.8	93.7	96.7	101.9	101.2	87.7	103.067	96.9333	1.06327	0.539985
Q96RD9	FCRL5	Fc receptor-like protein 5 OS=Homo sapiens OX=9606 GN=FCRL5 PE=1 SV=3	3.17298	3	3	3	977	106.371	7.14	96.8	102	110.3	91.9	110.2	88.9	103.033	97	1.0622	0.478738
P61626	LYZ	Lysozyme C OS=Homo sapiens OX=9606 GN=LYZ PE=1 SV=1	37.8378	6	7	6	148	16.526	9.16	106.1	98.5	104.3	89.6	114.3	87.2	102.967	97.0333	1.06115	0.544025
Q86UD1	OAF	Out at first protein homolog OS=Homo sapiens OX=9606 GN=OAF PE=2 SV=1	40.6593	8	12	8	273	30.669	6.84	112.7	106.9	89.2	99.3	95.3	96.6	102.933	97.0667	1.06044	0.4589
Q99426	TBCB	Tubulin-folding cofactor B OS=Homo sapiens OX=9606 GN=TBCB PE=1 SV=2	3.27869	1	1	1	244	27.308	5.15	98.8	106.1	103.9	91.4	98.9	101	102.933	97.1	1.06008	0.183172
Q96H15	TIMD4	T-cell immunoglobulin and mucin domain-containing protein 4 OS=Homo sapiens OX=9606 GN=TIMD4 PE=1 SV=2	4.7619	2	2	2	378	41.552	6.1	103.7	125.7	79.2	111.8	91.1	88.6	102.867	97.1667	1.05866	0.728562
Q9UJU6	DBNL	Drebrin-like protein OS=Homo sapiens OX=9606 GN=DBNL PE=1 SV=1	8.83721	2	2	2	430	48.178	5.05	101.2	112.8	94.5	104.6	97.2	89.7	102.833	97.1667	1.05832	0.455271
Q9Y4L1	HYOU1	Hypoxia up-regulated protein 1 OS=Homo sapiens OX=9606 GN=HYOU1 PE=1 SV=1	11.7117	10	14	10	999	111.266	5.22	97.7	117.1	93.4	104.3	94.8	92.8	102.733	97.3	1.05584	0.539437
P78509	RELN	Reelin OS=Homo sapiens OX=9606 GN=RELN PE=1 SV=3	1.82081	6	6	6	3460	388.137	5.88	103.4	110.6	94.2	94.4	95.3	102.2	102.733	97.3	1.05584	0.367055
Q8NHW5	RPLP0P6	60S acidic ribosomal protein P0-like OS=Homo sapiens OX=9606 GN=RPLP0P6 PE=5 SV=1	6.62461	2	4	2	317	34.343	5.55	93	115.2	99.8	103.3	96.3	92.5	102.667	97.3667	1.05443	0.507421
Q9BUN1	MENT	Protein MENT OS=Homo sapiens OX=9606 GN=MENT PE=2 SV=1	2.34604	1	1	1	341	36.746	8.59	91.1	112.3	104.5	104.2	96.2	91.7	102.633	97.3667	1.05409	0.504433
P08887	IL6R	Interleukin-6 receptor subunit alpha OS=Homo sapiens OX=9606 GN=IL6R PE=1 SV=1	2.99145	1	1	1	468	51.515	8.22	98.7	103	106.1	92.2	108	92	102.6	97.4	1.05339	0.414582
P11717	IGF2R	Cation-independent mannose-6-phosphate receptor OS=Homo sapiens OX=9606 GN=IGF2R PE=1 SV=3	8.91208	22	25	22	2491	274.199	5.94	103.4	113.8	90.5	101.4	89.6	101.3	102.567	97.4333	1.05269	0.546146
P78527	PRKDC	DNA-dependent protein kinase catalytic subunit OS=Homo sapiens OX=9606 GN=PRKDC PE=1 SV=3	0.339147	1	1	1	4128	468.788	7.12	109.2	102.5	96	101.7	96.3	94.3	102.567	97.4333	1.05269	0.308651
Q3ZCW2	LGALSL	Galectin-related protein OS=Homo sapiens OX=9606 GN=LGALSL PE=1 SV=2	22.6744	3	4	3	172	18.974	5.35	88.4	110.1	108.9	97.4	100.9	94.3	102.467	97.5333	1.05058	0.535978
P22897	MRC1	Macrophage mannose receptor 1 OS=Homo sapiens OX=9606 GN=MRC1 PE=1 SV=1	13.5302	18	23	18	1456	165.905	6.54	112.8	112.4	81.9	99	96.4	97.5	102.367	97.6333	1.04848	0.668577
P22692	IGFBP4	Insulin-like growth factor-binding protein 4 OS=Homo sapiens OX=9606 GN=IGFBP4 PE=1 SV=2	17.0543	4	6	4	258	27.915	7.15	100.8	111.4	94.4	103.5	95.5	94.5	102.2	97.8333	1.04463	0.487553
P00738	HP	Haptoglobin OS=Homo sapiens OX=9606 GN=HP PE=1 SV=1	17.734	7	10	7	406	45.177	6.58	76.4	94.5	135.6	88.6	101.3	103.6	102.167	97.8333	1.04429	0.82279
Q96IY4	CPB2	Carboxypeptidase B2 OS=Homo sapiens OX=9606 GN=CPB2 PE=1 SV=2	33.0969	14	36	14	423	48.393	7.71	100.6	109.6	96.2	92.9	102.2	98.5	102.133	97.8667	1.0436	0.422611
Q6ZN30	BNC2	Zinc finger protein basonuclin-2 OS=Homo sapiens OX=9606 GN=BNC2 PE=1 SV=1	1.00091	1	2	1	1099	122.252	6.52	104.5	102	99.9	97.1	98.4	98.1	102.133	97.8667	1.0436	0.0370244
P00709	LALBA	Alpha-lactalbumin OS=Homo sapiens OX=9606 GN=LALBA PE=1 SV=1	5.6338	1	1	1	142	16.214	5	110.9	109.9	85.6	104.4	77.2	112	102.133	97.8667	1.0436	0.766389
O95479	H6PD	GDH/6PGL endoplasmic bifunctional protein OS=Homo sapiens OX=9606 GN=H6PD PE=1 SV=2	18.9633	14	15	14	791	88.836	7.3	97.4	119.2	89.7	97.1	89.1	107.4	102.1	97.8667	1.04326	0.702146
P02776	PF4	Platelet factor 4 OS=Homo sapiens OX=9606 GN=PF4 PE=1 SV=2	43.5644	5	7	5	101	10.838	8.62	86	88.1	132.2	100.2	95.9	97.6	102.1	97.9	1.0429	0.79487
P01019	AGT	Angiotensinogen OS=Homo sapiens OX=9606 GN=AGT PE=1 SV=1	31.134	12	92	12	485	53.121	6.32	104.7	115.8	85.6	96.8	103.5	93.6	102.033	97.9667	1.04151	0.684144
P24592	IGFBP6	Insulin-like growth factor-binding protein 6 OS=Homo sapiens OX=9606 GN=IGFBP6 PE=1 SV=1	19.5833	4	7	4	240	25.306	7.81	92.2	134	79.9	94.1	106.8	93	102.033	97.9667	1.04151	0.822299
O43493	TGOLN2	Trans-Golgi network integral membrane protein 2 OS=Homo sapiens OX=9606 GN=TGOLN2 PE=1 SV=3	16.0752	6	7	6	479	50.988	5.73	103.3	116.7	86	102.8	95.7	95.4	102	97.9667	1.04117	0.684025
Q86SQ4	ADGRG6	Adhesion G-protein coupled receptor G6 OS=Homo sapiens OX=9606 GN=ADGRG6 PE=1 SV=3	3.9312	4	4	4	1221	136.607	7.87	101.6	110.4	94	102.5	98.2	93.3	102	98	1.04082	0.502422
A6NIZ1		Ras-related protein Rap-1b-like protein OS=Homo sapiens OX=9606 PE=2 SV=1	12.5	2	3	2	184	20.912	5.48	95.5	115.3	95.2	97.5	98	98.5	102	98	1.04082	0.580305
P55103	INHBC	Inhibin beta C chain OS=Homo sapiens OX=9606 GN=INHBC PE=2 SV=1	12.5	4	5	4	352	38.213	7.11	108.3	103.7	93.8	92.1	97.8	104.4	101.933	98.1	1.03908	0.528563
P04746	AMY2A	Pancreatic alpha-amylase OS=Homo sapiens OX=9606 GN=AMY2A PE=1 SV=2	10.3718	5	6	1	511	57.67	7.05	83.4	141	81.3	116.8	112.6	64.9	101.9	98.1	1.03874	0.889533
P05141	SLC25A5	ADP/ATP translocase 2 OS=Homo sapiens OX=9606 GN=SLC25A5 PE=1 SV=7	4.36242	1	1	1	298	32.831	9.69	104.4	109.7	91.5	95.8	96.2	102.3	101.867	98.1	1.0384	0.55142
P23381	WARS	Tryptophan--tRNA ligase, cytoplasmic OS=Homo sapiens OX=9606 GN=WARS PE=1 SV=2	10.4034	4	4	4	471	53.132	6.23	117.3	93.3	95	105.8	85.3	103.3	101.867	98.1333	1.03804	0.729729
P51148	RAB5C	Ras-related protein Rab-5C OS=Homo sapiens OX=9606 GN=RAB5C PE=1 SV=2	5.09259	1	1	1	216	23.468	8.41	112.4	101.7	91.5	104.5	102.9	87	101.867	98.1333	1.03804	0.673345
P02788	LTF	Lactotransferrin OS=Homo sapiens OX=9606 GN=LTF PE=1 SV=6	36.6197	23	29	23	710	78.132	8.12	85.9	92.1	127.6	97.8	110.7	86	101.867	98.1667	1.03769	0.815144
Q06033	ITIH3	Inter-alpha-trypsin inhibitor heavy chain H3 OS=Homo sapiens OX=9606 GN=ITIH3 PE=1 SV=2	45.9551	32	132	32	890	99.787	5.74	113	101.4	91.1	96.8	85.2	112.5	101.833	98.1667	1.03735	0.735659
Q6KC79	NIPBL	Nipped-B-like protein OS=Homo sapiens OX=9606 GN=NIPBL PE=1 SV=2	0.249643	1	1	1	2804	315.854	7.91	94.7	107.1	103.7	104.9	83.4	106.2	101.833	98.1667	1.03735	0.680307
P22314	UBA1	Ubiquitin-like modifier-activating enzyme 1 OS=Homo sapiens OX=9606 GN=UBA1 PE=1 SV=3	2.45747	2	2	2	1058	117.774	5.76	135.5	70.6	99.3	67.3	59	168.3	101.8	98.2	1.03666	0.932335
Q12882	DPYD	Dihydropyrimidine dehydrogenase [NADP(+)] OS=Homo sapiens OX=9606 GN=DPYD PE=1 SV=2	1.36585	1	1	1	1025	111.329	7.05	100.8	116.1	88.5	114	93.1	87.6	101.8	98.2333	1.03631	0.768677
P48637	GSS	Glutathione synthetase OS=Homo sapiens OX=9606 GN=GSS PE=1 SV=1	17.7215	8	8	8	474	52.352	5.92	110.7	95.1	99.4	99.8	94.5	100.5	101.733	98.2667	1.03528	0.528038
P11279	LAMP1	Lysosome-associated membrane glycoprotein 1 OS=Homo sapiens OX=9606 GN=LAMP1 PE=1 SV=3	10.5516	4	6	4	417	44.854	8.75	102.5	101.3	101.3	94	106.2	94.6	101.7	98.2667	1.03494	0.4381
Q13423	NNT	NAD(P) transhydrogenase, mitochondrial OS=Homo sapiens OX=9606 GN=NNT PE=1 SV=3	1.65746	1	1	1	1086	113.823	8.09	111.4	104.5	89.3	97.6	113.2	84.1	101.733	98.3	1.03493	0.763194
P31939	ATIC	Bifunctional purine biosynthesis protein PURH OS=Homo sapiens OX=9606 GN=ATIC PE=1 SV=3	2.53378	1	1	1	592	64.575	6.71	120.8	76.4	107.7	106.2	91.5	97.4	101.633	98.3667	1.03321	0.825081
Q04721	NOTCH2	Neurogenic locus notch homolog protein 2 OS=Homo sapiens OX=9606 GN=NOTCH2 PE=1 SV=3	1.90206	4	5	4	2471	265.226	5.14	99.1	109.1	96.6	101.9	98.5	94.8	101.6	98.4	1.03252	0.501312
P11047	LAMC1	Laminin subunit gamma-1 OS=Homo sapiens OX=9606 GN=LAMC1 PE=1 SV=3	2.05096	4	4	4	1609	177.489	5.12	104.8	110.1	89.8	112.5	81.7	101	101.567	98.4	1.03218	0.784884
P30504	HLA-C	HLA class I histocompatibility antigen, Cw-4 alpha chain OS=Homo sapiens OX=9606 GN=HLA-C PE=1 SV=1	10.1093	3	3	3	366	40.969	6.47	109.6	103	92.1	113.6	87.2	94.4	101.567	98.4	1.03218	0.752813
Q9NPR2	SEMA4B	Semaphorin-4B OS=Homo sapiens OX=9606 GN=SEMA4B PE=1 SV=3	9.73558	8	8	8	832	92.135	6.95	105.3	101	98.1	100.1	96.3	99.2	101.467	98.5333	1.02977	0.286146
P11021	HSPA5	Endoplasmic reticulum chaperone BiP OS=Homo sapiens OX=9606 GN=HSPA5 PE=1 SV=2	46.4832	28	45	25	654	72.288	5.16	98.8	104.6	101	98.8	99	97.8	101.467	98.5333	1.02977	0.165356
Q9Y5C1	ANGPTL3	Angiopoietin-related protein 3 OS=Homo sapiens OX=9606 GN=ANGPTL3 PE=1 SV=1	29.3478	12	16	12	460	53.604	6.7	106.1	102.3	96	113.2	87.2	95.2	101.467	98.5333	1.02977	0.739628
Q93063	EXT2	Exostosin-2 OS=Homo sapiens OX=9606 GN=EXT2 PE=1 SV=1	8.91365	6	6	6	718	82.202	6.55	99	103.7	101.7	101.3	92.8	101.6	101.467	98.5667	1.02942	0.414713
Q15746	MYLK	Myosin light chain kinase, smooth muscle OS=Homo sapiens OX=9606 GN=MYLK PE=1 SV=4	0.574713	1	1	1	1914	210.583	6.15	93.8	104.3	106.2	101.9	86.8	107	101.433	98.5667	1.02908	0.710356
P10586	PTPRF	Receptor-type tyrosine-protein phosphatase F OS=Homo sapiens OX=9606 GN=PTPRF PE=1 SV=2	10.8547	16	19	16	1907	212.744	6.3	108.6	107.1	88.4	99.8	94.3	101.7	101.367	98.6	1.02806	0.707599
O75636	FCN3	Ficolin-3 OS=Homo sapiens OX=9606 GN=FCN3 PE=1 SV=2	39.7993	10	42	10	299	32.882	6.67	107.1	108.9	88.2	92	128.2	75.7	101.4	98.6333	1.02805	0.877668
Q14574	DSC3	Desmocollin-3 OS=Homo sapiens OX=9606 GN=DSC3 PE=1 SV=3	1.11607	1	1	1	896	99.906	6.1	92.1	106.4	105.6	99	106.9	90.1	101.367	98.6667	1.02736	0.708113
P23467	PTPRB	Receptor-type tyrosine-protein phosphatase beta OS=Homo sapiens OX=9606 GN=PTPRB PE=1 SV=3	0.350526	1	1	1	1997	224.161	7.61	97.9	118.2	87.7	101.2	98.7	96.2	101.267	98.7	1.026	0.791442
P32942	ICAM3	Intercellular adhesion molecule 3 OS=Homo sapiens OX=9606 GN=ICAM3 PE=1 SV=2	6.39854	4	4	4	547	59.503	5.43	97.3	113.8	92.4	98.5	105	93	101.167	98.8333	1.02361	0.766581
P48357	LEPR	Leptin receptor OS=Homo sapiens OX=9606 GN=LEPR PE=1 SV=2	1.71674	1	1	1	1165	132.408	6.52	101.6	109.3	92.4	93.5	107.1	96.1	101.1	98.9	1.02224	0.749149
P10451	SPP1	Osteopontin OS=Homo sapiens OX=9606 GN=SPP1 PE=1 SV=1	7.96178	2	2	2	314	35.401	4.58	106.8	102.5	94	103.5	92.9	100.4	101.1	98.9333	1.0219	0.681428
P39060	COL18A1	Collagen alpha-1(XVIII) chain OS=Homo sapiens OX=9606 GN=COL18A1 PE=1 SV=5	5.30217	6	6	6	1754	178.077	6.01	96.3	123	83.8	102.3	102.8	91.8	101.033	98.9667	1.02088	0.872719
P29622	SERPINA4	Kallistatin OS=Homo sapiens OX=9606 GN=SERPINA4 PE=1 SV=3	53.3958	19	104	19	427	48.511	7.75	106	102	95	94.4	112.6	90.1	101	99.0333	1.01986	0.808787
P02766	TTR	Transthyretin OS=Homo sapiens OX=9606 GN=TTR PE=1 SV=1	9.52381	2	3	2	147	15.877	5.76	109.1	91.3	102.4	92.2	115.5	89.6	100.933	99.1	1.0185	0.859772
P39687	ANP32A	Acidic leucine-rich nuclear phosphoprotein 32 family member A OS=Homo sapiens OX=9606 GN=ANP32A PE=1 SV=1	5.22088	1	1	1	249	28.568	4.09	91	112.7	99	89	107.9	100.5	100.9	99.1333	1.01782	0.8435
Q7L9L4	MOB1B	MOB kinase activator 1B OS=Homo sapiens OX=9606 GN=MOB1B PE=1 SV=3	5.09259	1	1	1	216	25.075	6.73	103.5	96.1	103	79.2	99.7	118.6	100.867	99.1667	1.01714	0.890806
P09619	PDGFRB	Platelet-derived growth factor receptor beta OS=Homo sapiens OX=9606 GN=PDGFRB PE=1 SV=1	3.88788	3	3	3	1106	123.889	4.98	104	103.1	95.3	102.4	109.3	85.8	100.8	99.1667	1.01647	0.838281
P27930	IL1R2	Interleukin-1 receptor type 2 OS=Homo sapiens OX=9606 GN=IL1R2 PE=1 SV=1	6.53266	3	3	3	398	45.392	7.9	104.9	114.5	83.1	88.4	115.4	93.8	100.833	99.2	1.01647	0.901748
Q6ZRP7	QSOX2	Sulfhydryl oxidase 2 OS=Homo sapiens OX=9606 GN=QSOX2 PE=1 SV=3	4.44126	2	2	2	698	77.48	7.72	90.5	103	108.9	108.3	93.7	95.7	100.8	99.2333	1.01579	0.836002
P07942	LAMB1	Laminin subunit beta-1 OS=Homo sapiens OX=9606 GN=LAMB1 PE=1 SV=2	4.3673	7	9	7	1786	197.909	4.94	108.7	103	90.7	105.3	90	102.4	100.8	99.2333	1.01579	0.835868
Q03591	CFHR1	Complement factor H-related protein 1 OS=Homo sapiens OX=9606 GN=CFHR1 PE=1 SV=2	47.5758	12	52	1	330	37.626	7.39	110.4	112.2	79.5	111.1	115.3	71.4	100.7	99.2667	1.01444	0.938855
Q9UJC5	SH3BGRL2	SH3 domain-binding glutamic acid-rich-like protein 2 OS=Homo sapiens OX=9606 GN=SH3BGRL2 PE=1 SV=2	11.215	1	2	1	107	12.318	6.71	92.5	98.1	111.5	88.4	104.2	105.4	100.7	99.3333	1.01376	0.870406
O95998	IL18BP	Interleukin-18-binding protein OS=Homo sapiens OX=9606 GN=IL18BP PE=1 SV=2	4.63918	1	1	1	194	21.086	7.39	104.4	119.9	77.6	93.3	109	95.8	100.633	99.3667	1.01275	0.928603
A0A075B6S5	IGKV1-27	Immunoglobulin kappa variable 1-27 OS=Homo sapiens OX=9606 GN=IGKV1-27 PE=3 SV=1	13.6752	1	1	1	117	12.703	8.29	102.9	119	79.6	132	78	88.5	100.5	99.5	1.01005	0.962708
P17900	GM2A	Ganglioside GM2 activator OS=Homo sapiens OX=9606 GN=GM2A PE=1 SV=4	12.9534	3	4	3	193	20.825	5.31	94.9	121.7	84.8	103.5	102.5	92.5	100.467	99.5	1.00972	0.937355
P07195	LDHB	L-lactate dehydrogenase B chain OS=Homo sapiens OX=9606 GN=LDHB PE=1 SV=2	34.4311	10	17	10	334	36.615	6.05	112.2	85.1	104.1	100.8	99.2	98.6	100.467	99.5333	1.00938	0.913372
Q9NQ38	SPINK5	Serine protease inhibitor Kazal-type 5 OS=Homo sapiens OX=9606 GN=SPINK5 PE=1 SV=2	0.657895	1	1	1	1064	120.637	8.06	89.7	118.2	93.4	103.1	99.2	96.3	100.433	99.5333	1.00904	0.926471
P02751	FN1	Fibronectin OS=Homo sapiens OX=9606 GN=FN1 PE=1 SV=4	56.0771	90	551	90	2386	262.46	5.71	94.9	90.9	115.5	98.2	99.5	101	100.433	99.5667	1.0087	0.915415
Q99969	RARRES2	Retinoic acid receptor responder protein 2 OS=Homo sapiens OX=9606 GN=RARRES2 PE=1 SV=1	7.36196	1	1	1	163	18.606	9.09	100.1	101.4	99.8	101.9	94.3	102.5	100.433	99.5667	1.0087	0.762971
P26927	MST1	Hepatocyte growth factor-like protein OS=Homo sapiens OX=9606 GN=MST1 PE=1 SV=2	45.429	25	48	25	711	80.268	7.68	98.6	100.3	102.1	98.4	98.1	102.5	100.333	99.6667	1.00669	0.72145
P14314	PRKCSH	Glucosidase 2 subunit beta OS=Homo sapiens OX=9606 GN=PRKCSH PE=1 SV=2	7.57576	4	5	4	528	59.388	4.41	106.9	98.6	95.5	104	92.5	102.5	100.333	99.6667	1.00669	0.899586
P00533	EGFR	Epidermal growth factor receptor OS=Homo sapiens OX=9606 GN=EGFR PE=1 SV=2	3.30579	3	3	3	1210	134.19	6.68	80.2	119.2	101.6	98.7	97.6	102.8	100.333	99.7	1.00635	0.958311
P05164	MPO	Myeloperoxidase OS=Homo sapiens OX=9606 GN=MPO PE=1 SV=1	13.9597	8	8	8	745	83.815	8.97	76	90.4	134.4	96.2	121.1	82	100.267	99.7667	1.00501	0.982107
P00742	F10	Coagulation factor X OS=Homo sapiens OX=9606 GN=F10 PE=1 SV=2	43.4426	19	45	19	488	54.697	5.94	97.8	102.5	100.3	93.4	107.6	98.4	100.2	99.8	1.00401	0.931541
P60953	CDC42	Cell division control protein 42 homolog OS=Homo sapiens OX=9606 GN=CDC42 PE=1 SV=2	6.80628	1	1	1	191	21.245	6.55	91.2	111.9	97.4	111.5	94.2	93.7	100.167	99.8	1.00367	0.967573
P15151	PVR	Poliovirus receptor OS=Homo sapiens OX=9606 GN=PVR PE=1 SV=2	8.63309	4	5	4	417	45.274	6.52	109.8	104.6	86	92.2	106.5	101	100.133	99.9	1.00234	0.979017
Q08378	GOLGA3	Golgin subfamily A member 3 OS=Homo sapiens OX=9606 GN=GOLGA3 PE=1 SV=2	0.46729	1	1	1	1498	167.252	5.44	99.8	100.9	99.7	108.5	97.7	93.5	100.133	99.9	1.00234	0.960996
P24593	IGFBP5	Insulin-like growth factor-binding protein 5 OS=Homo sapiens OX=9606 GN=IGFBP5 PE=1 SV=1	9.55882	2	4	2	272	30.55	8.21	97.8	98	104.4	100.3	103.6	96	100.067	99.9667	1.001	0.975722
O95486	SEC24A	Protein transport protein Sec24A OS=Homo sapiens OX=9606 GN=SEC24A PE=1 SV=2	1.0064	1	1	1	1093	119.674	7.66	105.7	99.9	94.5	111.4	82.1	106.4	100.033	99.9667	1.00067	0.994797
Q8NCW5	NAXE	NAD(P)H-hydrate epimerase OS=Homo sapiens OX=9606 GN=NAXE PE=1 SV=2	10.7639	2	2	2	288	31.654	7.66	103.7	103.6	92.5	116.4	83.4	100.3	99.9333	100.033	0.999	0.992666
Q10471	GALNT2	Polypeptide N-acetylgalactosaminyltransferase 2 OS=Homo sapiens OX=9606 GN=GALNT2 PE=1 SV=1	8.23117	4	6	4	571	64.691	8.35	86.9	114.8	98.1	102.4	96.7	101	99.9333	100.033	0.999	0.990948
Q8TAQ9	SUN3	SUN domain-containing protein 3 OS=Homo sapiens OX=9606 GN=SUN3 PE=1 SV=4	1.96078	1	1	1	357	40.478	7.83	134.6	84.8	80.5	99.6	104.9	95.8	99.9667	100.1	0.998668	0.994305
P25311	AZGP1	Zinc-alpha-2-glycoprotein OS=Homo sapiens OX=9606 GN=AZGP1 PE=1 SV=2	60.7383	20	158	20	298	34.237	6.05	102.4	114.4	82.8	94.4	107.5	98.5	99.8667	100.133	0.997337	0.979981
P00748	F12	Coagulation factor XII OS=Homo sapiens OX=9606 GN=F12 PE=1 SV=3	38.374	23	57	23	615	67.748	7.74	113	90.8	95.7	96.6	109.4	94.4	99.8333	100.133	0.997004	0.972563
P49720	PSMB3	Proteasome subunit beta type-3 OS=Homo sapiens OX=9606 GN=PSMB3 PE=1 SV=2	12.1951	2	2	2	205	22.933	6.55	104.2	93	102.1	99	111.6	90.1	99.7667	100.233	0.995344	0.950897
P03950	ANG	Angiogenin OS=Homo sapiens OX=9606 GN=ANG PE=1 SV=1	10.8844	1	1	1	147	16.539	9.64	99.6	108.3	91.2	98.5	95.4	107	99.7	100.3	0.994018	0.92556
Q13508	ART3	Ecto-ADP-ribosyltransferase 3 OS=Homo sapiens OX=9606 GN=ART3 PE=1 SV=2	24.6787	8	9	8	389	43.895	6.06	87.9	116	95	104.8	106.7	89.6	99.6333	100.367	0.992693	0.945184
P09972	ALDOC	Fructose-bisphosphate aldolase C OS=Homo sapiens OX=9606 GN=ALDOC PE=1 SV=2	18.956	5	7	4	364	39.431	6.87	109.6	96.6	92.5	101.9	101.1	98.3	99.5667	100.433	0.991371	0.87732
P01911	HLA-DRB1	HLA class II histocompatibility antigen, DRB1-15 beta chain OS=Homo sapiens OX=9606 GN=HLA-DRB1 PE=1 SV=2	3.38346	1	1	1	266	29.947	7.74	106.3	104.5	87.9	122.5	87	91.9	99.5667	100.467	0.991042	0.9463
P38571	LIPA	Lysosomal acid lipase/cholesteryl ester hydrolase OS=Homo sapiens OX=9606 GN=LIPA PE=1 SV=2	2.75689	1	2	1	399	45.39	6.92	95.9	109.3	93.4	101.6	88.8	111	99.5333	100.467	0.99071	0.913916
Q8IWZ6	BBS7	Bardet-Biedl syndrome 7 protein OS=Homo sapiens OX=9606 GN=BBS7 PE=1 SV=2	1.11888	1	1	1	715	80.302	6.05	81.4	97.6	119.5	115.5	100.8	85.3	99.5	100.533	0.989721	0.94497
P19652	ORM2	Alpha-1-acid glycoprotein 2 OS=Homo sapiens OX=9606 GN=ORM2 PE=1 SV=2	16.4179	3	3	3	201	23.588	5.11	113.2	87.4	97.8	118.9	82.4	100.3	99.4667	100.533	0.98939	0.938219
Q03167	TGFBR3	Transforming growth factor beta receptor type 3 OS=Homo sapiens OX=9606 GN=TGFBR3 PE=1 SV=3	1.99765	1	1	1	851	93.44	5.71	102.2	99.9	96.2	94.2	93.8	113.7	99.4333	100.567	0.988731	0.87565
P04179	SOD2	Superoxide dismutase [Mn], mitochondrial OS=Homo sapiens OX=9606 GN=SOD2 PE=1 SV=3	32.4324	7	8	7	222	24.735	8.25	133.4	80.9	83.8	89.8	118.8	93.3	99.3667	100.633	0.987413	0.950907
P49257	LMAN1	Protein ERGIC-53 OS=Homo sapiens OX=9606 GN=LMAN1 PE=1 SV=2	2.15686	1	1	1	510	57.513	6.77	106.2	104.1	87.6	107.1	79.4	115.7	99.3	100.733	0.985771	0.913762
Q16394	EXT1	Exostosin-1 OS=Homo sapiens OX=9606 GN=EXT1 PE=1 SV=2	10.1877	7	7	7	746	86.2	9.04	99.6	104.9	93.3	101.8	95.3	105.2	99.2667	100.767	0.985114	0.752243
P46940	IQGAP1	Ras GTPase-activating-like protein IQGAP1 OS=Homo sapiens OX=9606 GN=IQGAP1 PE=1 SV=1	1.87085	2	2	2	1657	189.134	6.48	104.9	99.4	93.4	101.9	108.6	91.9	99.2333	100.8	0.984458	0.803062
Q9Y6R7	FCGBP	IgGFc-binding protein OS=Homo sapiens OX=9606 GN=FCGBP PE=1 SV=3	6.73451	20	25	20	5405	571.639	5.34	95.6	103.5	98.5	108.7	99.9	93.8	99.2	100.8	0.984127	0.760473
P01031	C5	Complement C5 OS=Homo sapiens OX=9606 GN=C5 PE=1 SV=4	64.6778	89	581	89	1676	188.186	6.52	101.8	100.9	94.8	103.1	92.5	106.8	99.1667	100.8	0.983796	0.751576
P40227	CCT6A	T-complex protein 1 subunit zeta OS=Homo sapiens OX=9606 GN=CCT6A PE=1 SV=3	3.20151	1	1	1	531	57.988	6.68	97.5	100.6	99	124.4	73.2	105.2	99.0333	100.933	0.981176	0.905066
Q07075	ENPEP	Glutamyl aminopeptidase OS=Homo sapiens OX=9606 GN=ENPEP PE=1 SV=3	6.89655	7	9	7	957	109.176	5.47	95.5	107.2	94.2	107.9	97.5	97.7	98.9667	101.033	0.979545	0.720125
P00746	CFD	Complement factor D OS=Homo sapiens OX=9606 GN=CFD PE=1 SV=5	58.8933	11	19	11	253	27.016	7.71	94.3	123.7	78.7	101.4	105.3	96.6	98.9	101.1	0.978239	0.877824
Q9BTT0	ANP32E	Acidic leucine-rich nuclear phosphoprotein 32 family member E OS=Homo sapiens OX=9606 GN=ANP32E PE=1 SV=1	12.3134	2	2	2	268	30.674	3.85	95.9	112.1	88.6	112	96.4	95.1	98.8667	101.167	0.977265	0.807035
P12259	F5	Coagulation factor V OS=Homo sapiens OX=9606 GN=F5 PE=1 SV=4	27.5629	57	101	57	2224	251.546	6.05	108.5	102.2	85.8	96.8	104.8	101.9	98.8333	101.167	0.976936	0.760795
Q16270	IGFBP7	Insulin-like growth factor-binding protein 7 OS=Homo sapiens OX=9606 GN=IGFBP7 PE=1 SV=1	18.4397	5	6	5	282	29.111	7.9	93.6	111.9	90.9	102.2	105.6	95.8	98.8	101.2	0.976285	0.75545
P02760	AMBP	Protein AMBP OS=Homo sapiens OX=9606 GN=AMBP PE=1 SV=1	51.9886	15	155	15	352	38.974	6.25	97.7	108.3	90.3	98.6	102.6	102.5	98.7667	101.233	0.975634	0.670795
Q6UX71	PLXDC2	Plexin domain-containing protein 2 OS=Homo sapiens OX=9606 GN=PLXDC2 PE=1 SV=1	5.67108	3	3	3	529	59.546	6.46	75.1	151.4	69.7	90.5	87.8	125.6	98.7333	101.3	0.974663	0.93385
Q15691	MAPRE1	Microtubule-associated protein RP/EB family member 1 OS=Homo sapiens OX=9606 GN=MAPRE1 PE=1 SV=3	10.0746	3	3	2	268	29.98	5.14	99.4	105.2	91.5	98.2	102.5	103.2	98.7	101.3	0.974334	0.575213
P15144	ANPEP	Aminopeptidase N OS=Homo sapiens OX=9606 GN=ANPEP PE=1 SV=4	26.1634	23	38	23	967	109.471	5.48	104.9	97.4	93.6	98.8	108.1	97.2	98.6333	101.367	0.973035	0.595867
P02743	APCS	Serum amyloid P-component OS=Homo sapiens OX=9606 GN=APCS PE=1 SV=2	31.8386	7	61	7	223	25.371	6.54	96.9	102.9	96.1	92.8	103	108.3	98.6333	101.367	0.973035	0.615658
P00492	HPRT1	Hypoxanthine-guanine phosphoribosyltransferase OS=Homo sapiens OX=9606 GN=HPRT1 PE=1 SV=2	19.2661	3	4	3	218	24.564	6.68	108	89.7	98.2	90.3	83	130.8	98.6333	101.367	0.973035	0.870886
Q9HCL0	PCDH18	Protocadherin-18 OS=Homo sapiens OX=9606 GN=PCDH18 PE=2 SV=3	2.46696	2	2	2	1135	126.071	5.15	90.4	121.9	83.5	106.5	93.2	104.4	98.6	101.367	0.972706	0.83592
Q9Y3P9	RABGAP1	Rab GTPase-activating protein 1 OS=Homo sapiens OX=9606 GN=RABGAP1 PE=1 SV=3	1.029	1	1	1	1069	121.66	5.25	101.9	97.5	96.2	102.2	102.4	99.9	98.5333	101.5	0.970772	0.193838
P01591	JCHAIN	Immunoglobulin J chain OS=Homo sapiens OX=9606 GN=JCHAIN PE=1 SV=4	18.239	3	4	3	159	18.087	5.24	91.3	106.2	97.9	110.9	106.4	87.2	98.4667	101.5	0.970115	0.737741
Q9NPH3	IL1RAP	Interleukin-1 receptor accessory protein OS=Homo sapiens OX=9606 GN=IL1RAP PE=1 SV=2	17.3684	12	15	12	570	65.377	8.12	93.7	104.9	96.8	102	105	97.7	98.4667	101.567	0.969478	0.476875
P27918	CFP	Properdin OS=Homo sapiens OX=9606 GN=CFP PE=1 SV=2	37.3134	16	39	16	469	51.242	7.9	98.4	97.8	99.1	97.3	103.4	104	98.4333	101.567	0.96915	0.222788
O75882	ATRN	Attractin OS=Homo sapiens OX=9606 GN=ATRN PE=1 SV=2	28.2015	36	88	36	1429	158.432	7.31	96.1	95.4	103.8	97.5	103.1	104.2	98.4333	101.6	0.968832	0.404096
P02741	CRP	C-reactive protein OS=Homo sapiens OX=9606 GN=CRP PE=1 SV=1	27.6786	7	15	7	224	25.023	5.63	115.6	97.6	81.8	74.9	31.6	198.6	98.3333	101.7	0.966896	0.950516
P22792	CPN2	Carboxypeptidase N subunit 2 OS=Homo sapiens OX=9606 GN=CPN2 PE=1 SV=3	30.4587	14	68	14	545	60.518	5.99	92	113.8	89.1	106.1	98.7	100.3	98.3	101.7	0.966568	0.696675
P08581	MET	Hepatocyte growth factor receptor OS=Homo sapiens OX=9606 GN=MET PE=1 SV=4	1.00719	1	1	1	1390	155.441	7.33	104.7	94.3	95.8	107.4	105.5	92.3	98.2667	101.733	0.965924	0.579199
P01859	IGHG2	Immunoglobulin heavy constant gamma 2 OS=Homo sapiens OX=9606 GN=IGHG2 PE=1 SV=2	13.8037	4	5	1	326	35.878	7.59	114.4	77.2	103.2	100.4	93.9	110.9	98.2667	101.733	0.965924	0.788387
P12830	CDH1	Cadherin-1 OS=Homo sapiens OX=9606 GN=CDH1 PE=1 SV=3	10.0907	7	11	7	882	97.396	4.73	94.9	117.4	82.4	102.1	107.3	95.9	98.2333	101.767	0.96528	0.75904
P10909	CLU	Clusterin OS=Homo sapiens OX=9606 GN=CLU PE=1 SV=1	40.5345	21	133	21	449	52.461	6.27	95.2	104	95.5	97.8	105.5	102	98.2333	101.767	0.96528	0.387087
P06681	C2	Complement C2 OS=Homo sapiens OX=9606 GN=C2 PE=1 SV=2	48.9362	34	153	34	752	83.214	7.42	99.9	103.1	91.6	104.1	96.1	105.1	98.2	101.767	0.964953	0.468295
P0DOX2		Immunoglobulin alpha-2 heavy chain OS=Homo sapiens OX=9606 PE=1 SV=2	1.53846	1	1	1	455	48.903	6.67	104.9	82	107.4	103.5	99.5	102.6	98.1	101.867	0.963024	0.668822
P07686	HEXB	Beta-hexosaminidase subunit beta OS=Homo sapiens OX=9606 GN=HEXB PE=1 SV=3	5.21583	3	3	3	556	63.071	6.76	92.8	107.5	94	96.4	118.6	90.7	98.1	101.9	0.962709	0.715995
P04180	LCAT	Phosphatidylcholine-sterol acyltransferase OS=Homo sapiens OX=9606 GN=LCAT PE=1 SV=1	16.3636	6	11	6	440	49.546	6.11	93.8	99.2	101.1	96.7	103.6	105.6	98.0333	101.967	0.961425	0.320466
Q8N6C8	LILRA3	Leukocyte immunoglobulin-like receptor subfamily A member 3 OS=Homo sapiens OX=9606 GN=LILRA3 PE=1 SV=3	6.60592	2	3	2	439	47.442	8.09	103.9	82.3	107.9	84.1	62.8	159	98.0333	101.967	0.961425	0.902777
P19022	CDH2	Cadherin-2 OS=Homo sapiens OX=9606 GN=CDH2 PE=1 SV=4	5.62914	3	3	3	906	99.747	4.81	96.1	98.8	99.1	103.3	96.6	106.1	98	102	0.960784	0.250019
O00592	PODXL	Podocalyxin OS=Homo sapiens OX=9606 GN=PODXL PE=1 SV=2	5.19713	3	3	3	558	58.599	5.49	89.1	104.5	100.4	98.6	105.4	102	98	102	0.960784	0.468996
P05154	SERPINA5	Plasma serine protease inhibitor OS=Homo sapiens OX=9606 GN=SERPINA5 PE=1 SV=3	34.4828	15	42	15	406	45.646	9.26	104.6	100	89.2	91	120.7	94.5	97.9333	102.067	0.959504	0.711956
P20340	RAB6A	Ras-related protein Rab-6A OS=Homo sapiens OX=9606 GN=RAB6A PE=1 SV=3	16.3462	3	3	2	208	23.578	5.54	91.4	106	96.3	89.2	107.8	109.2	97.9	102.067	0.959177	0.619041
Q9BY67	CADM1	Cell adhesion molecule 1 OS=Homo sapiens OX=9606 GN=CADM1 PE=1 SV=2	17.1946	5	7	5	442	48.478	5.07	101.1	103.3	89	106.3	101	99.2	97.8	102.167	0.957259	0.425794
P09871	C1S	Complement C1s subcomponent OS=Homo sapiens OX=9606 GN=C1S PE=1 SV=1	46.0756	28	170	27	688	76.635	4.96	96.5	100.1	96.8	100.3	101.6	104.7	97.8	102.2	0.956947	0.0649167
P32004	L1CAM	Neural cell adhesion molecule L1 OS=Homo sapiens OX=9606 GN=L1CAM PE=1 SV=2	0.556881	1	1	1	1257	139.915	6.24	93.6	110.7	88.9	109.9	103.6	93.2	97.7333	102.233	0.955983	0.61322
O95497	VNN1	Pantetheinase OS=Homo sapiens OX=9606 GN=VNN1 PE=1 SV=2	18.1287	7	12	7	513	56.975	5.55	91.4	95.7	106	100.2	123.9	82.8	97.7	102.3	0.955034	0.735013
P00450	CP	Ceruloplasmin OS=Homo sapiens OX=9606 GN=CP PE=1 SV=1	66.4789	62	705	62	1065	122.128	5.72	99	102.8	91.1	113.6	86.9	106.6	97.6333	102.367	0.953761	0.615468
P07477	PRSS1	Trypsin-1 OS=Homo sapiens OX=9606 GN=PRSS1 PE=1 SV=1	21.4575	4	6	3	247	26.541	6.51	97.9	102.6	92.4	104.4	108.1	94.6	97.6333	102.367	0.953761	0.396631
P19320	VCAM1	Vascular cell adhesion protein 1 OS=Homo sapiens OX=9606 GN=VCAM1 PE=1 SV=1	45.1962	27	41	27	739	81.224	5.22	102.9	102.5	87.2	101.1	101.9	104.4	97.5333	102.467	0.951854	0.401614
P35052	GPC1	Glypican-1 OS=Homo sapiens OX=9606 GN=GPC1 PE=1 SV=2	2.50896	1	1	1	558	61.641	7.3	86.5	109.4	96.7	123.1	87.7	96.7	97.5333	102.5	0.951545	0.711813
Q8N5G2	MACO1	Macoilin OS=Homo sapiens OX=9606 GN=MACO1 PE=1 SV=1	1.05422	1	1	1	664	76.13	9.07	97.2	95.4	100	104.4	98.4	104.7	97.5333	102.5	0.951545	0.112539
Q9NZ08	ERAP1	Endoplasmic reticulum aminopeptidase 1 OS=Homo sapiens OX=9606 GN=ERAP1 PE=1 SV=3	11.4772	8	8	8	941	107.166	6.46	95.8	101.8	94.9	101.9	95.2	110.4	97.5	102.5	0.95122	0.365437
Q96BZ4	PLD4	Phospholipase D4 OS=Homo sapiens OX=9606 GN=PLD4 PE=2 SV=2	4.1502	2	2	2	506	55.591	8.35	86.3	93.6	112.6	97.1	112.9	97.6	97.5	102.533	0.95091	0.620661
P10645	CHGA	Chromogranin-A OS=Homo sapiens OX=9606 GN=CHGA PE=1 SV=7	4.37637	2	3	2	457	50.658	4.6	84.3	114.1	94	93.2	116	98.4	97.4667	102.533	0.950585	0.673434
Q15293	RCN1	Reticulocalbin-1 OS=Homo sapiens OX=9606 GN=RCN1 PE=1 SV=1	6.94864	2	2	2	331	38.866	5	102.9	107.8	81.7	111	98.4	98.2	97.4667	102.533	0.950585	0.605807
P06280	GLA	Alpha-galactosidase A OS=Homo sapiens OX=9606 GN=GLA PE=1 SV=1	3.9627	1	1	1	429	48.735	5.6	93.5	103.9	94.8	97.5	111.8	98.4	97.4	102.567	0.949626	0.413294
Q9UQP3	TNN	Tenascin-N OS=Homo sapiens OX=9606 GN=TNN PE=1 SV=2	3.38722	2	5	2	1299	143.944	5.63	93.1	101.4	97.6	101	96.8	110.2	97.3667	102.667	0.948377	0.315927
O75144	ICOSLG	ICOS ligand OS=Homo sapiens OX=9606 GN=ICOSLG PE=1 SV=2	9.27152	2	2	2	302	33.328	5.31	107.5	100.4	84.2	110.7	101.6	95.7	97.3667	102.667	0.948377	0.551393
Q86U17	SERPINA11	Serpin A11 OS=Homo sapiens OX=9606 GN=SERPINA11 PE=2 SV=2	11.1374	4	7	4	422	46.959	7.68	109.9	88	94.1	122.4	86.1	99.5	97.3333	102.667	0.948052	0.690335
Q13395	TARBP1	Probable methyltransferase TARBP1 OS=Homo sapiens OX=9606 GN=TARBP1 PE=1 SV=1	0.801974	1	1	1	1621	181.559	7.05	81.5	140.6	69.9	110.9	115.4	81.8	97.3333	102.7	0.947744	0.835972
P08709	F7	Coagulation factor VII OS=Homo sapiens OX=9606 GN=F7 PE=1 SV=1	14.8069	4	6	4	466	51.56	7.23	95.8	109	87	113.2	97.4	97.6	97.2667	102.733	0.946788	0.544363
P13473	LAMP2	Lysosome-associated membrane glycoprotein 2 OS=Homo sapiens OX=9606 GN=LAMP2 PE=1 SV=2	10.4878	5	7	5	410	44.932	5.63	98.2	102.7	90.6	101.1	109.7	97.8	97.1667	102.867	0.944588	0.318327
Q8IZF2	ADGRF5	Adhesion G protein-coupled receptor F5 OS=Homo sapiens OX=9606 GN=ADGRF5 PE=1 SV=3	6.31501	6	6	6	1346	149.361	6.65	94	100.6	96.8	97.8	110.5	100.2	97.1333	102.833	0.944571	0.259294
Q99714	HSD17B10	3-hydroxyacyl-CoA dehydrogenase type-2 OS=Homo sapiens OX=9606 GN=HSD17B10 PE=1 SV=3	7.66284	1	1	1	261	26.906	7.78	94.7	103.1	93.6	114.3	99.4	94.8	97.1333	102.833	0.944571	0.436864
Q68CJ9	CREB3L3	Cyclic AMP-responsive element-binding protein 3-like protein 3 OS=Homo sapiens OX=9606 GN=CREB3L3 PE=1 SV=2	2.1692	1	1	1	461	49.047	5.15	98.2	107.5	85.7	112.8	100.7	95.1	97.1333	102.867	0.944264	0.522749
P20062	TCN2	Transcobalamin-2 OS=Homo sapiens OX=9606 GN=TCN2 PE=1 SV=3	6.79157	3	3	3	427	47.505	7.01	74.5	138	78.7	113.5	130.7	64.5	97.0667	102.9	0.943311	0.847945
P07339	CTSD	Cathepsin D OS=Homo sapiens OX=9606 GN=CTSD PE=1 SV=1	34.2233	11	13	11	412	44.524	6.54	102.9	91.1	97.2	100.1	103.5	105.2	97.0667	102.933	0.943005	0.190133
P33908	MAN1A1	Mannosyl-oligosaccharide 1,2-alpha-mannosidase IA OS=Homo sapiens OX=9606 GN=MAN1A1 PE=1 SV=3	25.8806	17	25	17	653	72.922	6.47	96.2	103.5	91.4	106.7	93.2	108.9	97.0333	102.933	0.942681	0.383854
P13646	KRT13	Keratin, type I cytoskeletal 13 OS=Homo sapiens OX=9606 GN=KRT13 PE=1 SV=4	18.9956	9	16	2	458	49.557	4.96	95.4	106.5	89.2	103.5	90.6	114.9	97.0333	103	0.942071	0.528404
P23471	PTPRZ1	Receptor-type tyrosine-protein phosphatase zeta OS=Homo sapiens OX=9606 GN=PTPRZ1 PE=1 SV=4	1.42549	3	4	3	2315	254.429	4.88	95.3	102.5	93.1	104.1	102.2	102.7	96.9667	103	0.941424	0.105539
P01009	SERPINA1	Alpha-1-antitrypsin OS=Homo sapiens OX=9606 GN=SERPINA1 PE=1 SV=3	7.89474	3	3	3	418	46.707	5.59	105	96.8	89	96	111.3	102	96.9333	103.1	0.940188	0.390821
P08571	CD14	Monocyte differentiation antigen CD14 OS=Homo sapiens OX=9606 GN=CD14 PE=1 SV=2	29.8667	10	27	10	375	40.051	6.23	93.9	109.3	87.5	110	96	103.2	96.9	103.067	0.940168	0.4642
Q15762	CD226	CD226 antigen OS=Homo sapiens OX=9606 GN=CD226 PE=1 SV=2	4.16667	1	1	1	336	38.589	7.94	98.6	94.7	97.2	107.8	94	107.6	96.8333	103.133	0.938914	0.251795
Q14515	SPARCL1	SPARC-like protein 1 OS=Homo sapiens OX=9606 GN=SPARCL1 PE=1 SV=2	27.4096	13	16	13	664	75.161	4.81	93.3	108.6	88.4	105.7	100.8	103.1	96.7667	103.2	0.937661	0.361209
P21695	GPD1	Glycerol-3-phosphate dehydrogenase [NAD(+)], cytoplasmic OS=Homo sapiens OX=9606 GN=GPD1 PE=1 SV=4	3.72493	1	1	1	349	37.543	6.18	115.4	90	84.8	107.7	98	104.1	96.7333	103.267	0.936733	0.544125
O14960	LECT2	Leukocyte cell-derived chemotaxin-2 OS=Homo sapiens OX=9606 GN=LECT2 PE=1 SV=2	5.96026	1	1	1	151	16.379	9.39	95.4	118.6	76.2	117.4	105.6	86.8	96.7333	103.267	0.936733	0.688595
P58335	ANTXR2	Anthrax toxin receptor 2 OS=Homo sapiens OX=9606 GN=ANTXR2 PE=1 SV=5	1.63599	1	1	1	489	53.632	7.46	80.1	114.4	95.7	107.1	94.7	108.1	96.7333	103.3	0.936431	0.57638
P20933	AGA	N(4)-(beta-N-acetylglucosaminyl)-L-asparaginase OS=Homo sapiens OX=9606 GN=AGA PE=1 SV=2	6.35838	3	3	3	346	37.184	6.28	89.5	98.7	102	100.4	98.6	110.9	96.7333	103.3	0.936431	0.287506
Q9BXR6	CFHR5	Complement factor H-related protein 5 OS=Homo sapiens OX=9606 GN=CFHR5 PE=1 SV=1	22.3199	11	15	10	569	64.377	7.06	95.2	97.9	96.7	101.4	103.1	105.8	96.6	103.433	0.933935	0.0103826
Q9UK55	SERPINA10	Protein Z-dependent protease inhibitor OS=Homo sapiens OX=9606 GN=SERPINA10 PE=1 SV=1	32.4324	13	37	13	444	50.674	8.27	97.9	88.7	103.1	104.7	99.6	106	96.5667	103.433	0.933613	0.213084
P01011	SERPINA3	Alpha-1-antichymotrypsin OS=Homo sapiens OX=9606 GN=SERPINA3 PE=1 SV=2	49.1726	22	539	22	423	47.621	5.52	104.9	103.5	81.2	108.8	93.4	108.3	96.5333	103.5	0.932689	0.490638
P48960	CD97	CD97 antigen OS=Homo sapiens OX=9606 GN=CD97 PE=1 SV=4	1.91617	1	1	1	835	91.809	6.87	92.4	106.6	90.5	119.1	86.3	105.2	96.5	103.533	0.932067	0.549617
P07602	PSAP	Prosaposin OS=Homo sapiens OX=9606 GN=PSAP PE=1 SV=2	15.2672	7	9	7	524	58.074	5.17	87.4	104.2	97.8	101.7	102.6	106.4	96.4667	103.567	0.931445	0.236497
P00734	F2	Prothrombin OS=Homo sapiens OX=9606 GN=F2 PE=1 SV=2	60.6109	36	325	36	622	69.992	5.9	94.3	94.3	100.8	101.7	103.4	105.6	96.4667	103.567	0.931445	0.0438488
Q01459	CTBS	Di-N-acetylchitobiase OS=Homo sapiens OX=9606 GN=CTBS PE=1 SV=1	29.3506	9	12	9	385	43.732	6.64	98.4	95.1	95.8	100	107	103.7	96.4333	103.567	0.931123	0.0341818
P02545	LMNA	Prelamin-A/C OS=Homo sapiens OX=9606 GN=LMNA PE=1 SV=1	3.76506	1	1	1	664	74.095	7.02	109.4	91.8	88.1	107.5	93	110.3	96.4333	103.6	0.930824	0.44565
O75015	FCGR3B	Low affinity immunoglobulin gamma Fc region receptor III-B OS=Homo sapiens OX=9606 GN=FCGR3B PE=1 SV=2	15.0215	4	5	1	233	26.199	6.71	128.2	85.8	75.2	69.2	150.9	90.8	96.4	103.633	0.930203	0.817274
Q9GZT8	NIF3L1	NIF3-like protein 1 OS=Homo sapiens OX=9606 GN=NIF3L1 PE=1 SV=2	11.4058	3	3	3	377	41.942	6.65	93.5	101.7	93.7	104.6	108	98.4	96.3	103.667	0.928939	0.131741
P07360	C8G	Complement component C8 gamma chain OS=Homo sapiens OX=9606 GN=C8G PE=1 SV=3	69.3069	12	61	12	202	22.264	8.31	95.5	102.2	91.2	115.4	95.8	100	96.3	103.733	0.928342	0.333439
O75022	LILRB3	Leukocyte immunoglobulin-like receptor subfamily B member 3 OS=Homo sapiens OX=9606 GN=LILRB3 PE=1 SV=3	1.26783	1	1	1	631	69.342	6.93	94	99.9	94.9	104	102.6	104.6	96.2667	103.733	0.928021	0.017965
P02790	HPX	Hemopexin OS=Homo sapiens OX=9606 GN=HPX PE=1 SV=2	71.2121	31	680	31	462	51.643	7.02	102	105.7	81.1	110.5	98.8	101.9	96.2667	103.733	0.928021	0.425296
P48740	MASP1	Mannan-binding lectin serine protease 1 OS=Homo sapiens OX=9606 GN=MASP1 PE=1 SV=3	35.9084	24	50	23	699	79.195	5.49	95.1	104.1	89.5	98.6	106	106.7	96.2333	103.767	0.927401	0.204887
Q9BTY2	FUCA2	Plasma alpha-L-fucosidase OS=Homo sapiens OX=9606 GN=FUCA2 PE=1 SV=2	20.985	10	12	10	467	54.032	6.25	95.5	101.9	90.8	100.7	97.1	113.9	96.0667	103.9	0.924607	0.264115
P01860	IGHG3	Immunoglobulin heavy constant gamma 3 OS=Homo sapiens OX=9606 GN=IGHG3 PE=1 SV=2	32.0955	8	10	3	377	41.26	7.9	77	92.4	118.8	88.2	101.5	122.2	96.0667	103.967	0.924014	0.641495
Q9Y5Y7	LYVE1	Lymphatic vessel endothelial hyaluronic acid receptor 1 OS=Homo sapiens OX=9606 GN=LYVE1 PE=1 SV=2	15.2174	5	8	5	322	35.191	8.28	83.9	137.1	67.2	114.6	96.1	101.2	96.0667	103.967	0.924014	0.735233
Q13421	MSLN	Mesothelin OS=Homo sapiens OX=9606 GN=MSLN PE=1 SV=2	3.49206	2	2	2	630	68.942	6.38	93.6	113.8	80.5	109.1	93.2	109.9	95.9667	104.067	0.922165	0.506271
P40189	IL6ST	Interleukin-6 receptor subunit beta OS=Homo sapiens OX=9606 GN=IL6ST PE=1 SV=2	13.6166	10	11	10	918	103.471	5.95	89.6	107.2	90.7	103.9	111.2	97.4	95.8333	104.167	0.92	0.296626
Q14520	HABP2	Hyaluronan-binding protein 2 OS=Homo sapiens OX=9606 GN=HABP2 PE=1 SV=1	23.9286	15	53	15	560	62.63	6.54	103.3	92.2	91.9	112.4	94.7	105.5	95.8	104.2	0.919386	0.257822
P22891	PROZ	Vitamin K-dependent protein Z OS=Homo sapiens OX=9606 GN=PROZ PE=1 SV=2	24.5	10	18	10	400	44.715	5.97	93.5	84.6	109.3	108.2	96.3	108.1	95.8	104.2	0.919386	0.365231
Q92859	NEO1	Neogenin OS=Homo sapiens OX=9606 GN=NEO1 PE=1 SV=2	7.11841	9	10	9	1461	159.917	6.54	98.9	98.1	90.3	100.5	109	103.2	95.7667	104.233	0.918772	0.0849606
P09668	CTSH	Pro-cathepsin H OS=Homo sapiens OX=9606 GN=CTSH PE=1 SV=4	7.16418	2	2	2	335	37.369	8.07	90	99.4	97.9	103	106.8	102.9	95.7667	104.233	0.918772	0.0565268
Q8NBJ4	GOLM1	Golgi membrane protein 1 OS=Homo sapiens OX=9606 GN=GOLM1 PE=1 SV=1	10.2244	4	5	4	401	45.306	4.97	93.4	125	68.8	104.9	92.4	115.5	95.7333	104.267	0.918159	0.652819
P04217	A1BG	Alpha-1B-glycoprotein OS=Homo sapiens OX=9606 GN=A1BG PE=1 SV=4	53.3333	15	204	15	495	54.22	5.86	100.6	100.9	85.5	108.5	95.8	108.7	95.6667	104.333	0.916933	0.261678
P19823	ITIH2	Inter-alpha-trypsin inhibitor heavy chain H2 OS=Homo sapiens OX=9606 GN=ITIH2 PE=1 SV=2	50.5285	39	459	39	946	106.397	6.86	103.7	96	87.3	100.1	106	107	95.6667	104.367	0.91664	0.169846
A1X283	SH3PXD2B	SH3 and PX domain-containing protein 2B OS=Homo sapiens OX=9606 GN=SH3PXD2B PE=1 SV=3	0.768386	1	2	1	911	101.516	8.69	129.6	81.2	76.2	142.5	77.1	93.5	95.6667	104.367	0.91664	0.754709
P11226	MBL2	Mannose-binding protein C OS=Homo sapiens OX=9606 GN=MBL2 PE=1 SV=2	41.5323	10	17	10	248	26.127	5.49	75.6	85.9	125.2	114.6	92.4	106.3	95.5667	104.433	0.915097	0.618302
P05156	CFI	Complement factor I OS=Homo sapiens OX=9606 GN=CFI PE=1 SV=2	43.3962	24	150	24	583	65.707	7.5	95.6	97.2	93.8	105.5	99.6	108.2	95.5333	104.433	0.914778	0.030818
P05546	SERPIND1	Heparin cofactor 2 OS=Homo sapiens OX=9606 GN=SERPIND1 PE=1 SV=3	78.3567	30	188	30	499	57.034	6.9	94.5	90.5	101.6	108.7	113.7	91	95.5333	104.467	0.914486	0.305718
P13671	C6	Complement component C6 OS=Homo sapiens OX=9606 GN=C6 PE=1 SV=3	51.1777	44	175	44	934	104.718	6.76	102.6	94.1	89.8	108.3	97.4	107.8	95.5	104.5	0.913876	0.156914
P36222	CHI3L1	Chitinase-3-like protein 1 OS=Homo sapiens OX=9606 GN=CHI3L1 PE=1 SV=2	13.3159	3	3	3	383	42.598	8.46	97.6	103.2	85.6	116.5	95.9	101.1	95.4667	104.5	0.913557	0.325915
Q76LX8	ADAMTS13	A disintegrin and metalloproteinase with thrombospondin motifs 13 OS=Homo sapiens OX=9606 GN=ADAMTS13 PE=1 SV=1	12.1233	14	19	14	1427	153.505	7.17	94.5	102.4	89.4	108	103.3	102.4	95.4333	104.567	0.912655	0.0931831
P02748	C9	Complement component C9 OS=Homo sapiens OX=9606 GN=C9 PE=1 SV=2	47.9428	26	132	26	559	63.133	5.59	101.6	97.7	86.8	113.5	86.2	114.1	95.3667	104.6	0.911727	0.417038
P35590	TIE1	Tyrosine-protein kinase receptor Tie-1 OS=Homo sapiens OX=9606 GN=TIE1 PE=1 SV=1	2.46046	3	3	3	1138	125.01	7.03	95.2	94.8	96	106.5	105	102.6	95.3333	104.7	0.910538	0.00140504
O00391	QSOX1	Sulfhydryl oxidase 1 OS=Homo sapiens OX=9606 GN=QSOX1 PE=1 SV=3	38.9558	28	49	28	747	82.526	8.92	93.2	105.6	87	105.6	106.5	102.1	95.2667	104.733	0.909612	0.167976
Q02487	DSC2	Desmocollin-2 OS=Homo sapiens OX=9606 GN=DSC2 PE=1 SV=1	6.88124	4	6	4	901	99.899	5.34	98.3	103.3	84.1	103.9	108.7	101.8	95.2333	104.8	0.908715	0.192034
Q6E0U4	DMKN	Dermokine OS=Homo sapiens OX=9606 GN=DMKN PE=1 SV=3	1.89076	1	1	1	476	47.054	7.28	89.8	99.2	96.6	101.3	109.2	103.8	95.2	104.767	0.908686	0.058527
P49321	NASP	Nuclear autoantigenic sperm protein OS=Homo sapiens OX=9606 GN=NASP PE=1 SV=2	1.01523	1	1	1	788	85.186	4.3	102.8	90.9	91.9	108.1	101	105.2	95.2	104.767	0.908686	0.0918218
Q9UGM5	FETUB	Fetuin-B OS=Homo sapiens OX=9606 GN=FETUB PE=1 SV=2	35.0785	13	40	13	382	42.028	6.83	105.6	86	94	105.4	109.1	99.9	95.2	104.8	0.908397	0.201436
Q13217	DNAJC3	DnaJ homolog subfamily C member 3 OS=Homo sapiens OX=9606 GN=DNAJC3 PE=1 SV=1	3.57143	2	2	2	504	57.544	6.15	98.1	102.6	84.6	111.9	108.4	94.3	95.1	104.867	0.906866	0.269614
O15394	NCAM2	Neural cell adhesion molecule 2 OS=Homo sapiens OX=9606 GN=NCAM2 PE=1 SV=2	10.2748	9	10	9	837	92.988	5.6	90.3	106.7	88.3	109.9	100.2	104.7	95.1	104.933	0.90629	0.203039
P15311	EZR	Ezrin OS=Homo sapiens OX=9606 GN=EZR PE=1 SV=4	10.4096	7	8	2	586	69.37	6.27	101.7	93.3	90.1	124.4	94.5	96	95.0333	104.967	0.905367	0.390417
P08254	MMP3	Stromelysin-1 OS=Homo sapiens OX=9606 GN=MMP3 PE=1 SV=2	3.3543	2	2	2	477	53.943	6.16	69.4	157.1	58	85.8	119.4	110.3	94.8333	105.167	0.901743	0.76899
P07093	SERPINE2	Glia-derived nexin OS=Homo sapiens OX=9606 GN=SERPINE2 PE=1 SV=1	13.0653	5	6	5	398	43.974	9.29	80.2	113.5	90.7	112.3	99.4	103.9	94.8	105.2	0.901141	0.379271
P80108	GPLD1	Phosphatidylinositol-glycan-specific phospholipase D OS=Homo sapiens OX=9606 GN=GPLD1 PE=1 SV=3	36.1905	25	49	25	840	92.278	6.37	91.8	84.6	107.8	99.7	122.4	93.8	94.7333	105.3	0.899652	0.394676
Q96PD5	PGLYRP2	N-acetylmuramoyl-L-alanine amidase OS=Homo sapiens OX=9606 GN=PGLYRP2 PE=1 SV=1	41.1458	15	64	15	576	62.178	7.55	97	101.8	85.2	107	100.5	108.6	94.6667	105.367	0.89845	0.124553
Q9Y646	CPQ	Carboxypeptidase Q OS=Homo sapiens OX=9606 GN=CPQ PE=1 SV=1	12.2881	5	5	5	472	51.855	6.18	99.6	90.3	93.6	107.9	99.1	109.6	94.5	105.533	0.895452	0.0600013
P28827	PTPRM	Receptor-type tyrosine-protein phosphatase mu OS=Homo sapiens OX=9606 GN=PTPRM PE=1 SV=2	4.06336	5	6	5	1452	163.578	6.65	94.3	96.3	92.9	103.5	110.6	102.5	94.5	105.533	0.895452	0.0156597
Q9NZK5	ADA2	Adenosine deaminase 2 OS=Homo sapiens OX=9606 GN=ADA2 PE=1 SV=2	19.1781	8	8	8	511	58.895	7.91	98.4	107	78	107.8	107.5	101.3	94.4667	105.533	0.895136	0.27959
Q12913	PTPRJ	Receptor-type tyrosine-protein phosphatase eta OS=Homo sapiens OX=9606 GN=PTPRJ PE=1 SV=3	6.5819	8	9	8	1337	145.851	5.58	92.7	93.6	97.1	104.1	107.5	105	94.4667	105.533	0.895136	0.00277416
Q02763	TEK	Angiopoietin-1 receptor OS=Homo sapiens OX=9606 GN=TEK PE=1 SV=2	1.06762	1	1	1	1124	125.749	6.89	95.3	98.6	89.5	103.2	108.4	105.1	94.4667	105.567	0.894853	0.022281
Q6EMK4	VASN	Vasorin OS=Homo sapiens OX=9606 GN=VASN PE=1 SV=1	13.0758	8	14	8	673	71.668	7.39	97.3	102.4	83.6	105.4	113	98.3	94.4333	105.567	0.894537	0.188797
Q08554	DSC1	Desmocollin-1 OS=Homo sapiens OX=9606 GN=DSC1 PE=1 SV=2	1.45414	1	1	1	894	99.924	5.43	76.1	133.3	73.9	106.1	101.7	108.9	94.4333	105.567	0.894537	0.5996
Q6GTS8	PM20D1	N-fatty-acyl-amino acid synthase/hydrolase PM20D1 OS=Homo sapiens OX=9606 GN=PM20D1 PE=2 SV=3	7.76892	3	3	3	502	55.706	6.67	69.6	112.9	100.5	148.9	59.1	108.9	94.3333	105.633	0.893026	0.716557
P36980	CFHR2	Complement factor H-related protein 2 OS=Homo sapiens OX=9606 GN=CFHR2 PE=1 SV=1	46.6667	11	26	7	270	30.631	6.38	102.7	92.8	87.5	105.3	80.3	131.4	94.3333	105.667	0.892744	0.502864
P04278	SHBG	Sex hormone-binding globulin OS=Homo sapiens OX=9606 GN=SHBG PE=1 SV=2	42.0398	12	36	12	402	43.752	6.71	113.9	88.6	80.4	118.4	85.2	113.5	94.3	105.7	0.892148	0.47419
Q9UNN8	PROCR	Endothelial protein C receptor OS=Homo sapiens OX=9606 GN=PROCR PE=1 SV=1	12.605	3	4	3	238	26.655	7.18	79.6	104.7	98.6	97	133.3	86.8	94.3	105.7	0.892148	0.515692
Q14118	DAG1	Dystroglycan OS=Homo sapiens OX=9606 GN=DAG1 PE=1 SV=2	5.02793	3	4	3	895	97.381	8.56	93.2	106.3	83.3	112.3	102.7	102.2	94.2667	105.733	0.891551	0.197515
P02750	LRG1	Leucine-rich alpha-2-glycoprotein OS=Homo sapiens OX=9606 GN=LRG1 PE=1 SV=2	42.6513	12	72	12	347	38.154	6.95	104.5	92	86.2	132.6	76.1	108.5	94.2333	105.733	0.891236	0.541164
P98160	HSPG2	Basement membrane-specific heparan sulfate proteoglycan core protein OS=Homo sapiens OX=9606 GN=HSPG2 PE=1 SV=4	10.0205	33	38	33	4391	468.532	6.51	93.3	102.3	87.1	111.3	102.6	103.4	94.2333	105.767	0.890955	0.0913944
P13796	LCP1	Plastin-2 OS=Homo sapiens OX=9606 GN=LCP1 PE=1 SV=6	60.6061	31	52	25	627	70.244	5.43	109.2	86.4	87	111.4	94	112	94.2	105.8	0.890359	0.291107
Q969T9	WBP2	WW domain-binding protein 2 OS=Homo sapiens OX=9606 GN=WBP2 PE=1 SV=1	3.83142	1	1	1	261	28.068	5.91	82.8	94.7	105	107.8	107	102.6	94.1667	105.8	0.890044	0.153449
Q92520	FAM3C	Protein FAM3C OS=Homo sapiens OX=9606 GN=FAM3C PE=1 SV=1	10.5727	2	2	2	227	24.665	8.29	102.1	99.5	80.9	99.5	105.8	112.2	94.1667	105.833	0.889764	0.200324
P07711	CTSL	Cathepsin L1 OS=Homo sapiens OX=9606 GN=CTSL PE=1 SV=2	9.60961	3	4	3	333	37.54	5.45	95.4	95.7	91.4	101.9	113.2	102.4	94.1667	105.833	0.889764	0.041452
P05543	SERPINA7	Thyroxine-binding globulin OS=Homo sapiens OX=9606 GN=SERPINA7 PE=1 SV=2	50.6024	20	124	20	415	46.295	6.3	111.1	84.5	86.7	115.6	101.8	100.3	94.1	105.9	0.888574	0.295636
Q16706	MAN2A1	Alpha-mannosidase 2 OS=Homo sapiens OX=9606 GN=MAN2A1 PE=1 SV=2	15.9091	16	18	15	1144	131.057	7.58	90.7	98.3	93.3	109.7	106.9	101.1	94.1	105.9	0.888574	0.0249661
Q13332	PTPRS	Receptor-type tyrosine-protein phosphatase S OS=Homo sapiens OX=9606 GN=PTPRS PE=1 SV=3	4.72279	8	8	8	1948	216.905	6.46	91.7	102.3	88.3	107.8	105.1	104.9	94.1	105.933	0.888295	0.051891
P08603	CFH	Complement factor H OS=Homo sapiens OX=9606 GN=CFH PE=1 SV=4	65.5565	69	684	62	1231	139.005	6.61	95.5	93.1	93.7	104.9	98.6	114.3	94.1	105.933	0.888295	0.062484
P17936	IGFBP3	Insulin-like growth factor-binding protein 3 OS=Homo sapiens OX=9606 GN=IGFBP3 PE=1 SV=2	47.4227	14	33	14	291	31.654	8.69	100.8	80.9	100.5	97.3	118.4	102	94.0667	105.9	0.888259	0.26683
Q6V1P9	DCHS2	Protocadherin-23 OS=Homo sapiens OX=9606 GN=DCHS2 PE=2 SV=1	0.240055	1	1	1	2916	322.034	4.77	83.9	93.2	105	104.5	106.2	107.1	94.0333	105.933	0.887665	0.125222
Q16663	CCL15	C-C motif chemokine 15 OS=Homo sapiens OX=9606 GN=CCL15 PE=1 SV=2	16.8142	1	1	1	113	12.24	8.18	81.8	115.5	84.8	96.5	109	112.3	94.0333	105.933	0.887665	0.370076
P22352	GPX3	Glutathione peroxidase 3 OS=Homo sapiens OX=9606 GN=GPX3 PE=1 SV=2	41.5929	9	36	9	226	25.537	8.13	111.9	87.3	82.8	105.7	116.2	96	94	105.967	0.887071	0.328471
P02749	APOH	Beta-2-glycoprotein 1 OS=Homo sapiens OX=9606 GN=APOH PE=1 SV=3	66.6667	17	196	17	345	38.273	7.97	101.3	91.7	88.9	96.8	111.8	109.5	93.9667	106.033	0.886199	0.114114
P01344	IGF2	Insulin-like growth factor II OS=Homo sapiens OX=9606 GN=IGF2 PE=1 SV=1	13.8889	2	3	2	180	20.127	9.32	103.2	69.8	108.9	95.5	119.9	102.7	93.9667	106.033	0.886199	0.442767
Q86UN3	RTN4RL2	Reticulon-4 receptor-like 2 OS=Homo sapiens OX=9606 GN=RTN4RL2 PE=1 SV=1	5.71429	3	3	3	420	46.077	7.62	90.4	103.3	88.2	112.4	105.2	100.5	93.9667	106.033	0.886199	0.107876
Q00532	CDKL1	Cyclin-dependent kinase-like 1 OS=Homo sapiens OX=9606 GN=CDKL1 PE=1 SV=6	1.95531	1	2	1	358	41.776	8.85	90.3	106.9	84.7	107.8	101.5	108.8	93.9667	106.033	0.886199	0.161975
P29122	PCSK6	Proprotein convertase subtilisin/kexin type 6 OS=Homo sapiens OX=9606 GN=PCSK6 PE=1 SV=1	1.34159	1	1	1	969	106.351	7.68	95.6	94.4	91.8	114.9	97.5	105.8	93.9333	106.067	0.885607	0.0779397
P56730	PRSS12	Neurotrypsin OS=Homo sapiens OX=9606 GN=PRSS12 PE=2 SV=2	2.4	1	1	1	875	97.004	8.03	93.7	99.9	88.1	109.8	108.4	100.1	93.9	106.1	0.885014	0.0554282
P08697	SERPINF2	Alpha-2-antiplasmin OS=Homo sapiens OX=9606 GN=SERPINF2 PE=1 SV=3	47.2505	22	129	22	491	54.531	6.29	99	88.7	93.8	103.9	111.1	103.4	93.8333	106.133	0.884108	0.0337673
Q8IXL6	FAM20C	Extracellular serine/threonine protein kinase FAM20C OS=Homo sapiens OX=9606 GN=FAM20C PE=1 SV=2	17.637	9	9	9	584	66.193	7.74	101.1	90.3	89.9	102.8	106.6	109.3	93.7667	106.233	0.882648	0.0390662
O00194	RAB27B	Ras-related protein Rab-27B OS=Homo sapiens OX=9606 GN=RAB27B PE=1 SV=4	13.3028	2	2	2	218	24.592	5.52	87.5	107.8	85.8	97.5	102.8	118.6	93.7	106.3	0.881468	0.255078
Q99941	ATF6B	Cyclic AMP-dependent transcription factor ATF-6 beta OS=Homo sapiens OX=9606 GN=ATF6B PE=1 SV=2	3.12945	2	3	2	703	76.661	6.27	96.9	93.1	91	117.1	97.7	104.2	93.6667	106.333	0.880878	0.100608
Q9BQ51	PDCD1LG2	Programmed cell death 1 ligand 2 OS=Homo sapiens OX=9606 GN=PDCD1LG2 PE=1 SV=2	4.7619	1	1	1	273	30.937	8.03	105.5	101	74.3	107.9	104.7	106.5	93.6	106.367	0.879975	0.261824
P07358	C8B	Complement component C8 beta chain OS=Homo sapiens OX=9606 GN=C8B PE=1 SV=3	50.423	27	117	27	591	67.003	8.13	88.7	97.7	94.4	116.9	97	105.3	93.6	106.4	0.879699	0.113694
P54802	NAGLU	Alpha-N-acetylglucosaminidase OS=Homo sapiens OX=9606 GN=NAGLU PE=1 SV=2	20.7268	11	12	11	743	82.214	6.65	104.9	91.5	84.4	106.4	104.1	108.7	93.6	106.4	0.879699	0.106078
P15169	CPN1	Carboxypeptidase N catalytic chain OS=Homo sapiens OX=9606 GN=CPN1 PE=1 SV=1	31.441	12	49	12	458	52.253	7.34	98.6	86.5	95.6	105.8	95.6	117.9	93.5667	106.433	0.879111	0.157115
Q14126	DSG2	Desmoglein-2 OS=Homo sapiens OX=9606 GN=DSG2 PE=1 SV=2	12.8801	11	12	11	1118	122.218	5.24	91.7	101.6	87.3	106.1	111.1	102.2	93.5333	106.467	0.878522	0.0592891
Q8IWV2	CNTN4	Contactin-4 OS=Homo sapiens OX=9606 GN=CNTN4 PE=1 SV=1	2.63158	3	4	3	1026	113.383	7.47	96.8	97.9	85.9	105.7	111.5	102.2	93.5333	106.467	0.878522	0.0510586
Q8WWZ8	OIT3	Oncoprotein-induced transcript 3 protein OS=Homo sapiens OX=9606 GN=OIT3 PE=1 SV=2	5.13761	3	3	3	545	59.983	5.58	98.8	92.5	89	113.5	99.1	107.1	93.4333	106.567	0.876759	0.0602309
P0C0L5	C4B	Complement C4-B OS=Homo sapiens OX=9606 GN=C4B PE=1 SV=2	63.3601	91	946	4	1744	192.631	7.27	84.4	100.3	95.6	113.6	89.1	117	93.4333	106.567	0.876759	0.258283
Q13867	BLMH	Bleomycin hydrolase OS=Homo sapiens OX=9606 GN=BLMH PE=1 SV=1	8.35165	3	3	3	455	52.528	6.27	96.6	97.8	85.9	103.8	101.6	114.3	93.4333	106.567	0.876759	0.0734417
P23435	CBLN1	Cerebellin-1 OS=Homo sapiens OX=9606 GN=CBLN1 PE=1 SV=1	3.62694	1	1	1	193	21.084	7.28	87	93.6	99.7	146.3	101.9	71.5	93.4333	106.567	0.876759	0.583103
P00751	CFB	Complement factor B OS=Homo sapiens OX=9606 GN=CFB PE=1 SV=2	62.3037	44	392	44	764	85.479	7.06	92.2	94.4	93.5	105.2	94.9	119.6	93.3667	106.567	0.876134	0.140323
P00747	PLG	Plasminogen OS=Homo sapiens OX=9606 GN=PLG PE=1 SV=2	71.6049	52	363	52	810	90.51	7.24	94.6	91.3	94.1	102.3	108.2	109.5	93.3333	106.667	0.875	0.00546833
P16112	ACAN	Aggrecan core protein OS=Homo sapiens OX=9606 GN=ACAN PE=1 SV=3	1.30435	2	2	2	2530	261.169	4.13	87	104.7	88.3	100.1	112.3	107.6	93.3333	106.667	0.875	0.117956
Q14624	ITIH4	Inter-alpha-trypsin inhibitor heavy chain H4 OS=Homo sapiens OX=9606 GN=ITIH4 PE=1 SV=4	55.0538	42	430	42	930	103.293	6.98	91.7	92.1	96	107.6	106.1	106.5	93.2667	106.733	0.873829	0.000733892
P07357	C8A	Complement component C8 alpha chain OS=Homo sapiens OX=9606 GN=C8A PE=1 SV=2	47.9452	22	140	22	584	65.121	6.47	92.6	97.1	90	115.6	96.6	108	93.2333	106.733	0.873517	0.0839551
Q9H4A9	DPEP2	Dipeptidase 2 OS=Homo sapiens OX=9606 GN=DPEP2 PE=1 SV=3	13.5802	5	5	5	486	53.331	6.54	95.3	95.6	88.8	107.1	114.2	99	93.2333	106.767	0.873244	0.0513262
P06276	BCHE	Cholinesterase OS=Homo sapiens OX=9606 GN=BCHE PE=1 SV=1	26.0797	15	38	15	602	68.374	7.42	92.2	93.9	93.5	96.3	120.9	103.1	93.2	106.767	0.872932	0.13875
Q9NZP8	C1RL	Complement C1r subcomponent-like protein OS=Homo sapiens OX=9606 GN=C1RL PE=1 SV=2	22.9979	11	24	9	487	53.464	7.2	97	94.3	88	111.2	97.1	112.5	93.1	106.933	0.870636	0.0691169
Q7Z3B1	NEGR1	Neuronal growth regulator 1 OS=Homo sapiens OX=9606 GN=NEGR1 PE=1 SV=3	12.1469	3	3	3	354	38.694	6.21	89.8	104.2	85.2	111.8	104.3	104.6	93.0667	106.9	0.870596	0.0904189
Q9BWP8	COLEC11	Collectin-11 OS=Homo sapiens OX=9606 GN=COLEC11 PE=1 SV=1	24.3542	6	12	6	271	28.647	5.41	86.9	105.2	87.1	110	102.7	108.1	93.0667	106.933	0.870324	0.0979571
P07333	CSF1R	Macrophage colony-stimulating factor 1 receptor OS=Homo sapiens OX=9606 GN=CSF1R PE=1 SV=2	4.32099	3	6	3	972	107.915	6.37	91	89.5	98.7	108.6	103.8	108.4	93.0667	106.933	0.870324	0.0130187
Q96EE4	CCDC126	Coiled-coil domain-containing protein 126 OS=Homo sapiens OX=9606 GN=CCDC126 PE=2 SV=2	13.5714	2	3	2	140	15.658	9.88	79.2	96.7	103.2	105.6	110.6	104.9	93.0333	107.033	0.8692	0.130997
P01042	KNG1	Kininogen-1 OS=Homo sapiens OX=9606 GN=KNG1 PE=1 SV=2	60.0932	42	349	42	644	71.912	6.81	88.9	96.2	93.7	102.6	105	113.4	92.9333	107	0.868536	0.0228536
Q15389	ANGPT1	Angiopoietin-1 OS=Homo sapiens OX=9606 GN=ANGPT1 PE=1 SV=2	2.00803	1	1	1	498	57.476	6.76	95.5	94.5	88.8	109.9	104.3	107	92.9333	107.067	0.867995	0.00587063
P40967	PMEL	Melanocyte protein PMEL OS=Homo sapiens OX=9606 GN=PMEL PE=1 SV=2	1.059	1	1	1	661	70.211	5.58	86	99.5	93.3	111.1	105	105.2	92.9333	107.1	0.867725	0.0319444
P17813	ENG	Endoglin OS=Homo sapiens OX=9606 GN=ENG PE=1 SV=2	10.1824	5	7	5	658	70.533	6.61	92.5	105	81.1	116.3	115.1	89.9	92.8667	107.1	0.867102	0.266534
P02745	C1QA	Complement C1q subcomponent subunit A OS=Homo sapiens OX=9606 GN=C1QA PE=1 SV=2	40.4082	7	43	7	245	26	9.11	88.9	97.3	92.3	107.6	111.8	102.1	92.8333	107.167	0.866252	0.0182562
P19827	ITIH1	Inter-alpha-trypsin inhibitor heavy chain H1 OS=Homo sapiens OX=9606 GN=ITIH1 PE=1 SV=3	42.1515	31	474	31	911	101.326	6.79	98.3	92.9	87	104.2	106.6	110.9	92.7333	107.233	0.864781	0.0189508
P10643	C7	Complement component C7 OS=Homo sapiens OX=9606 GN=C7 PE=1 SV=2	58.7189	41	198	40	843	93.457	6.48	90.6	104.4	83	108	108.1	105.9	92.6667	107.333	0.863354	0.080568
A0A087WW87	IGKV2-40	Immunoglobulin kappa variable 2-40 OS=Homo sapiens OX=9606 GN=IGKV2-40 PE=3 SV=2	10.7438	1	1	1	121	13.302	4.61	91.4	93.3	93.3	113.7	118.4	89.9	92.6667	107.333	0.863354	0.172594
Q15582	TGFBI	Transforming growth factor-beta-induced protein ig-h3 OS=Homo sapiens OX=9606 GN=TGFBI PE=1 SV=1	36.896	19	31	19	683	74.634	7.71	98.5	94.3	85	99.9	111.3	111.1	92.6	107.433	0.86193	0.0538913
P55265	ADAR	Double-stranded RNA-specific adenosine deaminase OS=Homo sapiens OX=9606 GN=ADAR PE=1 SV=4	0.815661	1	1	1	1226	135.981	8.65	96.7	89.6	91.4	109.9	107.7	104.8	92.5667	107.467	0.861352	0.00454447
Q5JPE7	NOMO2	Nodal modulator 2 OS=Homo sapiens OX=9606 GN=NOMO2 PE=1 SV=1	0.552486	1	1	1	1267	139.351	5.76	99.7	93.4	84.5	108.7	101.5	112.1	92.5333	107.433	0.861309	0.0510008
O00462	MANBA	Beta-mannosidase OS=Homo sapiens OX=9606 GN=MANBA PE=2 SV=3	5.91581	4	4	4	879	100.831	5.52	93.7	95.1	88.8	112.5	103.7	106.2	92.5333	107.467	0.861042	0.00997035
Q86TY3	ARMH4	Armadillo-like helical domain-containing protein 4 OS=Homo sapiens OX=9606 GN=ARMH4 PE=1 SV=1	1.16279	1	2	1	774	84.121	4.34	88.1	112.6	76.6	124	103.9	94.8	92.4333	107.567	0.859312	0.330637
O75023	LILRB5	Leukocyte immunoglobulin-like receptor subfamily B member 5 OS=Homo sapiens OX=9606 GN=LILRB5 PE=1 SV=1	2.0339	1	1	1	590	64.086	7.3	98.4	104.5	74.3	119.3	118.1	85.4	92.4	107.6	0.858736	0.35171
P42785	PRCP	Lysosomal Pro-X carboxypeptidase OS=Homo sapiens OX=9606 GN=PRCP PE=1 SV=1	9.07258	3	4	3	496	55.764	7.21	96.9	84.1	96.2	109.1	103	110.7	92.4	107.6	0.858736	0.0333555
P01033	TIMP1	Metalloproteinase inhibitor 1 OS=Homo sapiens OX=9606 GN=TIMP1 PE=1 SV=1	37.6812	6	9	6	207	23.156	8.1	86	98.8	92.3	100	104.6	118.4	92.3667	107.667	0.857895	0.0828619
Q86SF2	GALNT7	N-acetylgalactosaminyltransferase 7 OS=Homo sapiens OX=9606 GN=GALNT7 PE=1 SV=1	1.21766	1	1	1	657	75.341	7.11	93.2	98.8	85.1	109.2	106.7	107.1	92.3667	107.667	0.857895	0.0194984
Q86YW5	TREML1	Trem-like transcript 1 protein OS=Homo sapiens OX=9606 GN=TREML1 PE=1 SV=2	12.5402	3	6	3	311	32.658	6.05	87.6	98.4	91	112.8	97.1	113.1	92.3333	107.667	0.857585	0.0678758
P36955	SERPINF1	Pigment epithelium-derived factor OS=Homo sapiens OX=9606 GN=SERPINF1 PE=1 SV=4	51.4354	19	114	19	418	46.283	6.38	96.3	94.9	85.7	105.8	108.9	108.4	92.3	107.7	0.85701	0.0112474
P08397	HMBS	Porphobilinogen deaminase OS=Homo sapiens OX=9606 GN=HMBS PE=1 SV=2	6.92521	2	2	2	361	39.306	7.18	98.5	106.3	71.9	110.8	116.4	96.1	92.2333	107.767	0.855861	0.266686
P14543	NID1	Nidogen-1 OS=Homo sapiens OX=9606 GN=NID1 PE=1 SV=3	14.996	17	20	17	1247	136.291	5.29	91.1	94.5	91.1	115.2	103.6	104.6	92.2333	107.8	0.855597	0.0159757
Q13740	ALCAM	CD166 antigen OS=Homo sapiens OX=9606 GN=ALCAM PE=1 SV=2	20.9262	9	13	9	583	65.061	6.25	99.8	95.9	81	114.5	102.2	106.7	92.2333	107.8	0.855597	0.082749
P49908	SELENOP	Selenoprotein P OS=Homo sapiens OX=9606 GN=SELENOP PE=1 SV=3	12.5984	6	13	6	381	43.156	7.87	95.1	86.1	95.3	96.6	123.7	103.2	92.1667	107.833	0.854714	0.146274
Q07954	LRP1	Prolow-density lipoprotein receptor-related protein 1 OS=Homo sapiens OX=9606 GN=LRP1 PE=1 SV=2	4.31338	18	20	18	4544	504.276	5.39	96	93.9	86.6	108.1	102.7	112.7	92.1667	107.833	0.854714	0.0181334
P02746	C1QB	Complement C1q subcomponent subunit B OS=Homo sapiens OX=9606 GN=C1QB PE=1 SV=3	47.4308	10	66	10	253	26.704	8.63	90.8	93.1	92.5	107.3	110.7	105.7	92.1333	107.9	0.853877	0.000634934
Q9H410	DSN1	Kinetochore-associated protein DSN1 homolog OS=Homo sapiens OX=9606 GN=DSN1 PE=1 SV=2	4.21348	1	1	1	356	40.042	7.05	87.4	98.1	90.7	117.1	100	106.6	92.0667	107.9	0.853259	0.0549946
P05160	F13B	Coagulation factor XIII B chain OS=Homo sapiens OX=9606 GN=F13B PE=1 SV=3	60.0605	30	83	30	661	75.461	6.39	97.2	90.8	88.2	105.7	100.5	117.6	92.0667	107.933	0.852996	0.0502334
P00740	F9	Coagulation factor IX OS=Homo sapiens OX=9606 GN=F9 PE=1 SV=2	25.5965	11	18	11	461	51.745	5.47	102.7	71.7	101.7	111	103.6	109.3	92.0333	107.967	0.852424	0.200762
P43251	BTD	Biotinidase OS=Homo sapiens OX=9606 GN=BTD PE=1 SV=2	26.5193	13	42	13	543	61.093	6.25	93.2	92.6	89.9	105.2	113.2	105.9	91.9	108.1	0.850139	0.00416308
P15291	B4GALT1	Beta-1,4-galactosyltransferase 1 OS=Homo sapiens OX=9606 GN=B4GALT1 PE=1 SV=5	14.8241	4	5	4	398	43.892	8.65	93	96.9	85.6	116.7	111.3	96.5	91.8333	108.167	0.848998	0.0767026
Q9UMX5	NENF	Neudesin OS=Homo sapiens OX=9606 GN=NENF PE=1 SV=1	6.39535	1	1	1	172	18.845	5.69	92.4	106.9	76.2	104.6	93.2	126.7	91.8333	108.167	0.848998	0.2849
Q99453	PHOX2B	Paired mesoderm homeobox protein 2B OS=Homo sapiens OX=9606 GN=PHOX2B PE=1 SV=2	5.09554	1	1	1	314	31.601	8.84	88.9	84.1	102.4	100.2	118.5	105.9	91.8	108.2	0.848429	0.100121
O00533	CHL1	Neural cell adhesion molecule L1-like protein OS=Homo sapiens OX=9606 GN=CHL1 PE=1 SV=4	24.5861	22	33	22	1208	134.987	5.76	95	95.5	84.8	113.4	102.9	108.3	91.7667	108.2	0.848121	0.0236497
P04066	FUCA1	Tissue alpha-L-fucosidase OS=Homo sapiens OX=9606 GN=FUCA1 PE=1 SV=4	15.4506	7	9	7	466	53.655	6.84	97.3	94.2	83.8	105.8	102.2	116.7	91.7667	108.233	0.84786	0.0509984
P12821	ACE	Angiotensin-converting enzyme OS=Homo sapiens OX=9606 GN=ACE PE=1 SV=1	5.58959	6	7	6	1306	149.62	6.39	89.5	96.1	89.7	100.3	118.9	105.6	91.7667	108.267	0.847599	0.049976
Q14956	GPNMB	Transmembrane glycoprotein NMB OS=Homo sapiens OX=9606 GN=GPNMB PE=1 SV=2	3.14685	1	1	1	572	63.882	6.64	96.4	94.2	84.4	108.1	114.9	101.9	91.6667	108.3	0.846414	0.0341674
A0A0C4DH72	IGKV1-6	Immunoglobulin kappa variable 1-6 OS=Homo sapiens OX=9606 GN=IGKV1-6 PE=3 SV=1	13.6752	1	1	1	117	12.689	8.29	97.6	89.5	87.7	114.5	96.8	113.8	91.6	108.367	0.845278	0.0623652
Q9NY97	B3GNT2	N-acetyllactosaminide beta-1,3-N-acetylglucosaminyltransferase 2 OS=Homo sapiens OX=9606 GN=B3GNT2 PE=1 SV=2	12.3426	4	5	4	397	45.993	8.54	97.3	91.5	85.7	111.8	112.3	101.5	91.5	108.533	0.843059	0.0247574
Q9H1B5	XYLT2	Xylosyltransferase 2 OS=Homo sapiens OX=9606 GN=XYLT2 PE=1 SV=2	1.96532	1	1	1	865	96.706	8.22	89.4	107.4	77.4	126.3	95.6	103.9	91.4	108.6	0.841621	0.245576
P10619	CTSA	Lysosomal protective protein OS=Homo sapiens OX=9606 GN=CTSA PE=1 SV=2	13.5417	6	8	6	480	54.431	6.61	87.2	98.6	88	103.9	110.8	111.5	91.2667	108.733	0.839362	0.0165697
P11362	FGFR1	Fibroblast growth factor receptor 1 OS=Homo sapiens OX=9606 GN=FGFR1 PE=1 SV=3	4.0146	3	3	3	822	91.809	6.21	92.4	106.2	75.1	122	104	100.4	91.2333	108.8	0.838542	0.192052
Q96AP7	ESAM	Endothelial cell-selective adhesion molecule OS=Homo sapiens OX=9606 GN=ESAM PE=1 SV=1	1.79487	1	1	1	390	41.151	9.32	84	93.8	95.7	104.9	118.5	103.1	91.1667	108.833	0.837672	0.0435314
P03952	KLKB1	Plasma kallikrein OS=Homo sapiens OX=9606 GN=KLKB1 PE=1 SV=1	56.1129	35	92	34	638	71.323	8.22	80.5	105.4	87.6	104.9	99.6	122.1	91.1667	108.867	0.837416	0.152951
P02747	C1QC	Complement C1q subcomponent subunit C OS=Homo sapiens OX=9606 GN=C1QC PE=1 SV=3	36.3265	6	28	6	245	25.757	8.41	89.6	91.1	92.7	107.1	110.8	108.6	91.1333	108.833	0.837366	0.000224357
P24821	TNC	Tenascin OS=Homo sapiens OX=9606 GN=TNC PE=1 SV=3	13.2667	23	32	23	2201	240.7	4.89	89.7	98.1	85.6	112.4	110	104.2	91.1333	108.867	0.83711	0.0158638
Q9Y287	ITM2B	Integral membrane protein 2B OS=Homo sapiens OX=9606 GN=ITM2B PE=1 SV=1	4.13534	1	1	1	266	30.318	5.14	95.2	89.4	88.6	112.1	100.4	114.2	91.0667	108.9	0.836241	0.020147
P04004	VTN	Vitronectin OS=Homo sapiens OX=9606 GN=VTN PE=1 SV=1	47.9079	16	207	16	478	54.271	5.8	94.2	91	87.9	105.4	102.2	119.4	91.0333	109	0.835168	0.0323883
P00736	C1R	Complement C1r subcomponent OS=Homo sapiens OX=9606 GN=C1R PE=1 SV=2	53.0496	30	133	28	705	80.067	6.21	91.9	88.2	92.9	101.3	109.3	116.4	91	109	0.834862	0.017223
Q9Y251	HPSE	Heparanase OS=Homo sapiens OX=9606 GN=HPSE PE=1 SV=2	3.8674	2	3	2	543	61.11	9.28	82	111.2	79.8	102.4	111.2	113.4	91	109	0.834862	0.166678
Q6P179	ERAP2	Endoplasmic reticulum aminopeptidase 2 OS=Homo sapiens OX=9606 GN=ERAP2 PE=1 SV=2	3.02083	3	4	3	960	110.391	6.71	96.5	88.7	87.7	110.7	115.5	100.9	90.9667	109.033	0.834301	0.0242324
P43652	AFM	Afamin OS=Homo sapiens OX=9606 GN=AFM PE=1 SV=1	63.773	40	264	40	599	69.024	5.9	104.9	75.5	92.4	102.9	110	114.3	90.9333	109.067	0.833741	0.118388
Q9NQ79	CRTAC1	Cartilage acidic protein 1 OS=Homo sapiens OX=9606 GN=CRTAC1 PE=1 SV=2	24.9622	12	19	12	661	71.376	5.12	111.9	88	72.7	114.7	105.8	106.9	90.8667	109.133	0.832621	0.194872
P01137	TGFB1	Transforming growth factor beta-1 OS=Homo sapiens OX=9606 GN=TGFB1 PE=1 SV=2	8.46154	2	2	2	390	44.313	8.53	94.4	93.8	84.1	110.2	93.1	124.4	90.7667	109.233	0.830943	0.128044
P08174	CD55	Complement decay-accelerating factor OS=Homo sapiens OX=9606 GN=CD55 PE=1 SV=4	11.811	5	5	5	381	41.374	7.59	91	106	75.1	106.6	117.8	103.6	90.7	109.333	0.829573	0.13332
Q99784	OLFM1	Noelin OS=Homo sapiens OX=9606 GN=OLFM1 PE=1 SV=4	17.5258	7	10	7	485	55.307	6.95	102	85.2	84.5	98.1	124.4	105.8	90.5667	109.433	0.827597	0.123034
Q9GZM5	YIPF3	Protein YIPF3 OS=Homo sapiens OX=9606 GN=YIPF3 PE=1 SV=1	2.85714	1	1	1	350	38.223	5.76	85.3	105.4	80.9	109.9	115.3	103.2	90.5333	109.467	0.82704	0.0850302
P01701	IGLV1-51	Immunoglobulin lambda variable 1-51 OS=Homo sapiens OX=9606 GN=IGLV1-51 PE=1 SV=2	6.83761	1	1	1	117	12.241	7.03	105.9	85.4	80.3	116	103.8	108.7	90.5333	109.5	0.826788	0.0917948
P35858	IGFALS	Insulin-like growth factor-binding protein complex acid labile subunit OS=Homo sapiens OX=9606 GN=IGFALS PE=1 SV=1	45.6198	22	65	22	605	65.994	6.79	92.7	85.7	92.5	104.9	124.9	99.3	90.3	109.7	0.823154	0.0748397
Q8TBX8	PIP4K2C	Phosphatidylinositol 5-phosphate 4-kinase type-2 gamma OS=Homo sapiens OX=9606 GN=PIP4K2C PE=1 SV=3	1.90024	1	1	1	421	47.27	6.84	81.4	107.7	81.6	110.8	128.2	90.3	90.2333	109.767	0.822047	0.235662
Q8N157	AHI1	Jouberin OS=Homo sapiens OX=9606 GN=AHI1 PE=1 SV=1	0.752508	1	1	1	1196	137.029	7.12	97.1	87.4	85.6	96.6	129.2	104.1	90.0333	109.967	0.818733	0.130053
Q96KN2	CNDP1	Beta-Ala-His dipeptidase OS=Homo sapiens OX=9606 GN=CNDP1 PE=1 SV=4	44.5759	19	50	19	507	56.67	5.3	85.6	108.1	76.2	108.7	106.7	114.7	89.9667	110.033	0.817631	0.109062
O14773	TPP1	Tripeptidyl-peptidase 1 OS=Homo sapiens OX=9606 GN=TPP1 PE=1 SV=2	1.24334	1	1	1	563	61.21	6.48	77.2	104	88.3	102.6	109.8	118.1	89.8333	110.167	0.815431	0.0860762
P98066	TNFAIP6	Tumor necrosis factor-inducible gene 6 protein OS=Homo sapiens OX=9606 GN=TNFAIP6 PE=1 SV=2	5.41516	1	1	1	277	31.183	6.79	103	90.8	75.3	116.7	107.1	107.1	89.7	110.3	0.813237	0.0754198
Q8IUS5	EPHX4	Epoxide hydrolase 4 OS=Homo sapiens OX=9606 GN=EPHX4 PE=2 SV=2	1.9337	1	1	1	362	42.297	8.35	104.9	72.6	90.8	105.4	117.9	108.3	89.4333	110.533	0.809107	0.10453
P20774	OGN	Mimecan OS=Homo sapiens OX=9606 GN=OGN PE=1 SV=1	14.094	4	5	4	298	33.901	5.63	95.7	101.8	70.5	115.2	105.2	111.5	89.3333	110.633	0.807472	0.100563
Q9UNW1	MINPP1	Multiple inositol polyphosphate phosphatase 1 OS=Homo sapiens OX=9606 GN=MINPP1 PE=1 SV=1	28.5421	11	15	11	487	55.016	7.81	90.5	95.6	81.8	101.3	124	106.7	89.3	110.667	0.806928	0.054674
P18428	LBP	Lipopolysaccharide-binding protein OS=Homo sapiens OX=9606 GN=LBP PE=1 SV=3	26.8191	11	34	11	481	53.35	6.7	76.7	93.6	97.3	120.3	97.3	114.7	89.2	110.767	0.805296	0.0832133
Q16610	ECM1	Extracellular matrix protein 1 OS=Homo sapiens OX=9606 GN=ECM1 PE=1 SV=2	46.6667	22	48	22	540	60.635	6.71	93.4	81.9	92.1	104.6	125.8	102.1	89.1333	110.833	0.804211	0.0601471
P02647	APOA1	Apolipoprotein A-I OS=Homo sapiens OX=9606 GN=APOA1 PE=1 SV=1	35.9551	9	15	9	267	30.759	5.76	73.9	103.9	89.6	109.1	115	108.5	89.1333	110.867	0.803969	0.0712309
P13797	PLS3	Plastin-3 OS=Homo sapiens OX=9606 GN=PLS3 PE=1 SV=4	9.68254	7	13	1	630	70.766	5.6	98	85.7	82.9	125.5	114.8	93.3	88.8667	111.2	0.799161	0.101531
Q8WZ75	ROBO4	Roundabout homolog 4 OS=Homo sapiens OX=9606 GN=ROBO4 PE=1 SV=1	4.66733	4	5	4	1007	107.39	6.64	87.2	95.2	83.5	104.1	129.1	100.9	88.6333	111.367	0.79587	0.0761563
Q15848	ADIPOQ	Adiponectin OS=Homo sapiens OX=9606 GN=ADIPOQ PE=1 SV=1	19.2623	4	9	4	244	26.397	5.74	99.5	95.2	69.3	119.4	102.1	114.5	88	112	0.785714	0.0892649
P07359	GP1BA	Platelet glycoprotein Ib alpha chain OS=Homo sapiens OX=9606 GN=GP1BA PE=1 SV=2	13.6503	8	22	8	652	71.495	6.29	83.8	101.2	78.9	111.2	123.1	101.7	87.9667	112	0.785417	0.058761
Q99972	MYOC	Myocilin OS=Homo sapiens OX=9606 GN=MYOC PE=1 SV=2	9.12698	3	3	3	504	56.937	5.54	88.2	98.5	77	111.9	133.3	91.2	87.9	112.133	0.783888	0.150446
P07225	PROS1	Vitamin K-dependent protein S OS=Homo sapiens OX=9606 GN=PROS1 PE=1 SV=1	41.716	21	63	21	676	75.074	5.67	75.2	103.4	84	99.4	129.3	108.7	87.5333	112.467	0.778305	0.109267
P08637	FCGR3A	Low affinity immunoglobulin gamma Fc region receptor III-A OS=Homo sapiens OX=9606 GN=FCGR3A PE=1 SV=2	12.2047	4	5	1	254	29.071	8.07	83.8	102.1	76.5	128.7	97.6	111.3	87.4667	112.533	0.777251	0.100607
P09172	DBH	Dopamine beta-hydroxylase OS=Homo sapiens OX=9606 GN=DBH PE=1 SV=3	31.1183	14	22	14	617	69.021	6.42	93.9	98.7	69.2	133.9	96.8	107.4	87.2667	112.7	0.774327	0.15051
P41222	PTGDS	Prostaglandin-H2 D-isomerase OS=Homo sapiens OX=9606 GN=PTGDS PE=1 SV=1	24.7368	4	8	4	190	21.015	7.8	79	109	72.7	110.3	117.7	111.2	86.9	113.067	0.768573	0.0840837
Q9NTU7	CBLN4	Cerebellin-4 OS=Homo sapiens OX=9606 GN=CBLN4 PE=1 SV=1	9.45274	2	2	2	201	21.794	8.73	88.8	92.4	77.6	130.4	92.6	118.1	86.2667	113.7	0.758722	0.0840461
Q96S96	PEBP4	Phosphatidylethanolamine-binding protein 4 OS=Homo sapiens OX=9606 GN=PEBP4 PE=1 SV=3	20.7048	4	5	4	227	25.717	6.54	82.1	107.6	68.8	104.5	125.3	111.6	86.1667	113.8	0.757176	0.0991674
P04196	HRG	Histidine-rich glycoprotein OS=Homo sapiens OX=9606 GN=HRG PE=1 SV=1	44.7619	22	139	22	525	59.541	7.5	97.4	72.7	87.3	94.5	135.2	112.9	85.8	114.2	0.751313	0.10832
Q8NDA2	HMCN2	Hemicentin-2 OS=Homo sapiens OX=9606 GN=HMCN2 PE=2 SV=3	0.316268	1	1	1	5059	541.639	5.87	74	104.6	77.9	112.4	86.7	144.3	85.5	114.467	0.746942	0.206563
P01871	IGHM	Immunoglobulin heavy constant mu OS=Homo sapiens OX=9606 GN=IGHM PE=1 SV=4	29.8013	13	17	13	453	49.409	6.77	66.1	71	118.3	139.7	115.8	89.2	85.1333	114.9	0.740934	0.249796
P02768	ALB	Serum albumin OS=Homo sapiens OX=9606 GN=ALB PE=1 SV=2	58.6207	33	51	33	609	69.321	6.28	108	60.4	79.1	73.8	173	105.8	82.5	117.533	0.701929	0.339678
P05019	IGF1	Insulin-like growth factor I OS=Homo sapiens OX=9606 GN=IGF1 PE=1 SV=1	21.0256	4	5	4	195	21.827	9.72	78.6	77.1	86.4	100	150.8	107.2	80.7	119.333	0.676257	0.0747474
P28482	MAPK1	Mitogen-activated protein kinase 1 OS=Homo sapiens OX=9606 GN=MAPK1 PE=1 SV=3	1.94444	1	1	1	360	41.363	6.98	89.8	70.1	77.5	103.9	149.6	109	79.1333	120.833	0.654897	0.0552131
P55899	FCGRT	IgG receptor FcRn large subunit p51 OS=Homo sapiens OX=9606 GN=FCGRT PE=1 SV=1	1.91781	1	1	1	365	39.718	6.54	70.8	92.2	69.4	94.3	144.2	129.1	77.4667	122.533	0.632209	0.0524972
P35443	THBS4	Thrombospondin-4 OS=Homo sapiens OX=9606 GN=THBS4 PE=1 SV=2	23.5172	16	23	14	961	105.802	4.68	70.1	90.7	69.9	149.5	97	122.8	76.9	123.1	0.624695	0.0501114
P08519	LPA	Apolipoprotein(a) OS=Homo sapiens OX=9606 GN=LPA PE=1 SV=1	32.058	22	29	22	4548	500.995	5.88	70.6	90.3	68.3	68.3	246.7	55.7	76.4	123.567	0.61829	0.489627
P08294	SOD3	Extracellular superoxide dismutase [Cu-Zn] OS=Homo sapiens OX=9606 GN=SOD3 PE=1 SV=2	27.0833	4	8	4	240	25.835	6.61	64.5	65.5	95.6	218.2	76.1	80.1	75.2	124.8	0.602564	0.358178
Q9NYQ8	FAT2	Protocadherin Fat 2 OS=Homo sapiens OX=9606 GN=FAT2 PE=1 SV=2	0.712808	1	1	1	4349	479.018	5.16	100.6	42.7	82.2	93.2	152.4	129	75.1667	124.867	0.601975	0.109754
P28845	HSD11B1	Corticosteroid 11-beta-dehydrogenase isozyme 1 OS=Homo sapiens OX=9606 GN=HSD11B1 PE=1 SV=3	3.08219	1	1	1	292	32.38	8.56	78.6	77.5	68.5	83.2	209.7	82.5	74.8667	125.133	0.598295	0.301467
P0DOX3		Immunoglobulin delta heavy chain OS=Homo sapiens OX=9606 PE=1 SV=1	11.5234	5	8	5	512	56.189	8.02	63.3	83.5	66.7	72.3	135.1	179.2	71.1667	128.867	0.55225	0.142261
P06732	CKM	Creatine kinase M-type OS=Homo sapiens OX=9606 GN=CKM PE=1 SV=2	25.7218	7	7	7	381	43.074	7.25	58.3	73.4	62.9	98.9	120.7	185.8	64.8667	135.133	0.48002	0.0567873
Q9NU22	MDN1	Midasin OS=Homo sapiens OX=9606 GN=MDN1 PE=1 SV=2	0.125089	1	2	1	5596	632.42	5.68	28.4	32.3	75.8	24.2	419.4	20	45.5	154.533	0.294435	0.45933
