# Supplementary material for: Multiomics Integration of Serum Proteome and Autoantibody Profiles Reveals Diagnostic and Prognostic Biomarkers in Glioma
Source: Research Square preprint supplement (doi:10.21203/rs.3.rs-7933102/v1), 2025-11-05
Supplement: Supplementary file 3 [file 781ff80ef85126a6d4550c68.xlsx]

## Sheet: Sheet1
Supplementary Table S2. Differential autoantibody reactivities in the discovery cohort
Sample	WHO Grade	Gender	Age	IDH1	TERT	ATRX	MGMT	Ki-67	OS	Overall survival(Days)	IgM-p-APOE-1	IgM-p-MMP3-1	IgM-p-S100A12-1	IgM-EGFR	IgM-p-COL2A1-3	IgM-p-S100A4-1	IgM-p-EGFR-1	IgM-S100A4	IgM-p-SAA4-1	IgM-p-IL-1β-2	IgM-p-EGFR-2	IgM-p-COL1A2-2	IgM-p-COL2A1-2	IgM-p-S100A6-1	IgM-p-EGFR-7	IgM-p-IL-1β -1	IgM-p-P53-2	IgM-p-MMP2-2	IgM-p-S100A8-1	IgM-p-COL5A2-2	IgM-S100A8	IgM-S100A12	IgM-p-SAA4-2	IgM-P53	IgM-MMP2	IgM-APOE	IgM-p-EGFR-4	IgM-SAA4	IgM-p-EGFR-5	IgM-COL5A2	IgM-p-MMP2-1	IgM-p-S100A4-2	IgM-IL-1β	IgM-COL1A2	IgM-p-COL1A2-3	IgM-COL2A1	IgM-p-COL2A1-1	IgM-p-COL5A2-1	IgM-p-IGFBP1
Glioma1	3	Male	35	+	-	-	-	0.15	NA	NA	2506.98	1998.62	901.258	0	11.983	863.235	1238.86	1247.15	0	56.9191	0	49.7754	30.1879	7.37414	17.744	683.491	240.581	80.8851	943.89	50.0059	7134.94	298.422	732.344	63.602	2856.79	728.657	1780.39	551.217	614.358	1535.89	1971.66	17.9745	700.082	762.071	1377.58	241.503	545.917	180.666	1390.72
Glioma2	2	Male	44	+	+	+	-	0.05	NA	NA	780.822	381.37	187.397	1016.99	426.027	576.438	704.658	2298.08	39.4521	33.4247	344.658	213.425	204.11	639.452	1346.85	503.836	264.932	463.836	257.808	376.438	4619.45	495.616	175.89	1716.44	1019.45	2644.93	9504.66	657.534	767.123	356.986	1561.1	505.753	7232.88	1697.26	480.548	1303.01	547.671	136.712	356.986
Glioma3	4	Male	58	+	-	-	+	0.05	NA	NA	11428.1	1860.56	3309.23	43.1626	16.2932	1804.83	991.024	6296.02	0	14.2922	41.4475	10.2904	7.43197	11.7196	6.86028	12776.4	20.0091	22.8676	2234.45	49.1653	7007.77	803.224	1956.89	2750.11	3224.33	6786.82	175.795	1628.17	219.815	2187	2197.58	10.5763	483.364	9211.07	2009.49	284.987	577.979	3.14429	367.882
Glioma4	2	Male	49	+	+	+	+	0.05	NA	NA	2946.68	205.359	220.04	7.51525	44.9167	435.71	348.148	1076.25	11.1855	17.4773	17.1278	5.76752	14.5062	19.9242	55.7527	1986.65	956.534	55.4031	62.2193	0	2511.84	134.051	644.214	390.968	795.044	2105.84	141.741	482.2	53.6554	572.208	1439.43	1.57296	329.273	1940.16	704.336	357.761	478.879	0	235.07
Glioma5	2	Male	33	+	-	-	+	0.05	NA	NA	27.1233	338.904	42.7397	884.932	32.0548	24.3836	4912.6	48.4932	22.1918	0	106.027	20.8219	178.082	64.9315	19.1781	481.37	176.712	422.74	1.09589	4.65753	183.014	2124.38	5.47945	258.904	434.521	518.63	18.0822	40.8219	81.6438	127.397	22.7397	2129.32	396.712	385.753	13.6986	396.712	416.986	30.137	193.973
Glioma6	3	Male	43	-	+	+	+	0.15	853	853	3114.04	1117.96	1482.33	61.0355	80.0515	957.245	219.298	698.074	5.82751	29.751	56.7415	24.2302	33.4315	91.3998	133.113	708.502	61.0355	181.573	651.454	39.8724	4491.47	952.951	591.645	1267.64	3665.19	1348.91	1113.36	1089.74	116.243	3714.88	884.554	150.902	503.312	2619.62	134.339	487.67	304.257	35.8852	72.6905
Glioma7	4	Female	53	-	+	+	-	0.2	843	843	3890.84	631.358	1663.81	686.931	387.803	2371.03	298.886	8504.12	347.452	250.562	622.901	183.391	301.544	248.146	890.135	929.76	102.931	1316.36	472.371	413.173	5850.15	262.16	553.072	915.022	1239.28	710.851	735.738	615.411	921.062	1409.62	2222.68	100.998	519.487	1540.34	1718.41	1441.27	903.182	38.4179	571.194
Glioma8	4	Male	35	+	-	-	-	0.6	841	841	527.641	132.828	74.1039	27.9637	1.22341	1571.56	302.008	1576.46	8.21435	49.2861	89.8335	0	0	14.3314	14.5062	493.036	25.5169	86.338	401.629	0	3303.74	313.194	106.262	70.958	629.184	2403.31	622.717	1300.49	104.514	3000.16	1742.84	45.9654	225.632	2672.28	290.124	150.13	196.096	0	927.347
Glioma9	3	Male	32	+	-	-	+	0.05	912	742	4524.98	375.68	1694.25	526.182	770.95	200.747	361.621	2379.46	627.593	369.687	837.559	613.073	328.662	190.145	881.58	2451.14	0	466.027	815.202	544.39	2389.14	132.986	325.666	570.895	617.913	1229.37	1309.58	854.845	573.43	299.852	2457.82	61.5378	203.743	2217.2	861.068	743.293	740.297	215.958	1948.23
Glioma10	2	Female	36	+	+	+	+	0.02	898	738	16879.6	2036.28	1442.1	35.4937	131.373	2806.77	1218.31	7060.48	50.2443	61.0768	87.5818	60.1549	40.1033	345.718	210.657	11539.1	197.981	206.97	5313.45	879.045	15628.1	173.55	3197.89	279.34	4879.92	10798.4	2936.53	1514.7	494.837	1302.2	13327.6	528.026	612.842	2970.41	870.978	809.21	827.418	83.8942	2700.29
Glioma11	4	Male	46	-	-	+	+	0.4	727	727	2004.38	1128.09	304.427	90.4746	15.6481	165.586	65.7221	3352.68	5.97474	6.54376	1.13804	56.0487	39.8316	22.1919	155.628	567.884	76.249	123.193	1847.62	21.9074	7618.36	121.771	557.926	1011.44	654.66	1737.79	411.119	334.87	132.013	1009.16	2026.29	16.5017	3986.86	2007.23	233.584	321.213	1214.01	32.7188	2292.02
Glioma12	4	Female	57	-	+	+	+	0.5	886	723	2130.97	0	355.019	820.661	640.864	619.998	196.947	2269.04	6.86028	36.5882	749.485	309.284	462.783	316.716	958.438	1599.87	165.504	554.539	424.766	797.793	5567.69	216.67	0	791.505	1199.12	2154.7	3216.04	817.517	509.662	746.627	1048.77	95.4722	2551.45	2854.45	1156.81	1434.08	218.671	363.023	0
Glioma13	2	Male	19	-	-	+	-	0.03	701	701	1246	189.515	270.409	0	16.8649	112.909	64.3151	461.64	0	11.148	0	7.71781	0	7.43197	0	1340.9	12.2913	476.789	283.272	54.5964	1465.24	119.483	134.919	4664.7	938.143	668.591	180.94	333.295	144.066	1521.27	181.512	71.7471	144.066	1272.01	184.084	186.371	273.839	10.0046	132.346
Glioma14	2	Female	35	+	-	+	+	0.05	701	701	1112.82	141.445	1184.23	91.2196	189.226	433.836	283.975	3066.44	83.075	26.0627	16.8322	131.4	105.065	15.4748	143.617	1163.59	0	172.394	764.236	328.228	2026.38	184.068	328.771	749.304	1185.85	619.805	158.82	480.532	107.509	1933.53	1220.88	170.765	317.911	1248.84	805.773	492.477	644.781	56.4693	380.082
Glioma15	3	Female	58	+	-	+	+	0.08	826	658	3198.39	51.311	826.406	0	29.3206	946.132	10.588	2778.4	0	3.80082	0	41.266	12.7599	39.3656	20.9045	1038.98	11.4024	32.3069	72.487	74.3874	4099.72	174.295	97.1923	695.006	1139.97	942.331	21.176	829.121	32.5784	1792.08	2816.13	41.5375	698.807	3792.94	213.66	513.653	350.218	0	1210.56
Glioma16	4	Male	32	-	-	+	+	0.5	645	645	1054.04	111.935	34.479	0	20.6388	3187.85	73.5714	1959.96	0.728429	1.45686	11.8977	3.39934	27.4375	28.1659	14.083	1696.75	539.523	124.804	138.159	54.6322	7080.58	630.334	101.252	1012.03	2868.31	3589.7	274.375	831.381	189.392	2148.87	565.747	191.82	697.107	2607.78	101.737	1326.47	82.7981	44.1914	76.7279
Glioma17	3	Male	41	+	-	-	+	0.15	591	591	3688.35	747.672	414.17	0	14.9811	742.602	219.416	1204.25	26.0441	23.5088	33.6499	0.230478	168.019	40.3337	25.8136	2361.02	53.932	61.9987	492.072	4.14861	8070.66	101.641	427.999	1513.78	1559.19	2083.06	1088.32	946.575	0	530.792	386.512	50.9357	210.196	1324.33	257.675	495.068	239.928	283.719	405.181
Glioma18	3	Female	49	+	+	+	+	0.1	685	529	25468.5	1519.83	3195.82	273.097	342.824	4137.49	1970.15	12099.1	627.179	238.96	329.024	327.934	459.762	347.182	316.313	10497.2	918.434	2070.38	814.57	459.399	10784.8	527.31	3609.82	615.195	10537.1	36034.6	3192.91	2855.53	1582.66	3761.26	3284.79	314.134	7308.25	7341.3	4447.63	3756.54	1749.35	111.49	1468.99
Glioma19	4	Female	18	-	-	+	-	0.2	927	521	763.88	6530.37	48.8048	37.8783	54.875	454.783	116.306	2219.04	8.74115	16.2683	34.7218	24.7666	53.661	84.0122	101.98	358.144	65.5586	203.475	1186.13	103.437	32258.7	1203.37	112.421	125.533	2638.37	1960.45	740.813	1218.91	370.528	1187.58	1105.27	122.619	668.213	1084.63	132.331	350.375	299.87	68.7152	286.758
Glioma20	4	Female	51	+	-	-	+	0.3	512	512	5136.91	1305.56	260.023	79.5322	218.26	6385.1	1199.52	1903.69	51.5689	47.2109	242.955	106.769	63.19	456.493	254.576	4410.23	281.45	1319.36	1116.36	50.4794	4833.67	852.702	1284.14	936.592	6579.02	13852.8	1543.43	1740.99	2052.22	433.614	6205.69	672.937	2344.57	11233.3	3272.08	1384.73	5703.44	171.412	3066.17
Glioma21	3	Male	43	+	+	+	+	0.08	26	500	923.688	102.031	46.3137	94.7433	47.9594	102.031	31.7378	565.874	4.7019	24.685	4.23171	36.2046	19.0427	72.4093	151.871	330.779	25.1552	151.871	59.7141	63.4756	2180.74	12.2249	42.7873	380.149	1219.44	963.889	231.804	219.109	78.0515	887.954	83.9289	54.0718	199.596	799.558	214.642	490.173	227.102	26.8008	112.61
Glioma22	2	Male	45	+	-	-	+	0.04	479	479	2263.59	934.563	986.401	828.912	307.078	1006.15	847.673	5835.46	298.685	222.162	550.469	205.377	339.661	276.469	648.714	2183.61	186.123	328.306	3896.23	193.034	5836.45	309.052	714.869	630.447	1765.45	2188.05	2722.23	2153	730.173	5233.16	1208.56	335.712	1464.3	4356.36	370.764	2026.61	2061.67	95.7766	364.346
Glioma23	3	Male	55	+	-	-	+	0.15	465	465	1531.53	126.994	370.609	219.646	292.477	460.035	87.8123	2385.68	229.787	106.942	205.817	71.4483	126.994	362.543	420.854	1218.54	586.107	646.492	179.082	166.866	1183.74	232.783	129.759	310.224	2484.1	914.769	85.9685	4629.39	166.405	5137.6	333.502	123.767	1734.35	4105.97	78.5932	366.23	830.414	101.411	324.283
Glioma24	4	Female	61	-	+	+	+	0.15	462	462	1066.66	11789.9	1401.26	188.42	193.034	197.89	1429.66	1901.2	296.714	292.343	203.475	123.105	235.525	36.1787	287.487	709.733	162.44	227.756	539.281	135.973	3296.87	370.042	1644.07	338.477	1304.37	3435.27	232.855	173.123	1378.67	1124.94	531.268	40.0636	252.279	820.211	164.139	401.365	479.307	116.549	241.11
Glioma25	3	Female	55	+	-	+	+	0.08	642	459	9077.55	3594.09	2425.02	1449.98	1456.4	2321.84	1663.75	10196.8	0	936.537	0	974.058	1492.93	1327.54	2614.11	3428.21	260.67	1619.81	2707.42	859.521	4262.06	0	2159.42	7277.05	2246.31	5485.43	2416.14	822.494	1312.73	947.892	353.485	304.609	1432.7	2194.47	451.236	3326.51	130.335	305.103	433.957
Glioma26	2	Female	30	+	-	+	-	0.03	651	455	3788.61	2203.85	1780.26	89.8523	411.247	2701	1131.55	4387.46	0	213.769	7.40541	218.706	231.049	433.463	694.134	4853.01	386.562	525.29	1969.35	1130.07	2213.72	2097.71	920.246	2172.75	2945.87	6713.74	875.319	1418.38	648.22	2537.09	4365.24	371.752	4337.6	5047.53	2439.34	1151.79	735.11	104.169	390.018
Glioma27	4	Male	69	-	+	-	+	0.35	446	446	5560.23	746.427	1570.2	12.9302	94.038	797.677	89.101	2405.26	4.7019	30.5623	34.0888	63.0055	26.5657	135.885	143.173	4333.27	73.8198	206.884	58.7737	500.282	1863.36	390.963	123.66	408.36	1650.13	5425.76	206.413	801.439	341.358	852.925	1436.67	97.5644	6806.23	2941.74	823.538	528.494	2032.87	26.0955	957.072
Glioma28	4	Male	37	-	-	+	+	0.4	427	427	7808.14	786.688	1419.31	232.487	181.501	1510.75	205.054	2992.68	0	28.8184	16.3489	52.372	110.84	211.151	194.524	4845.93	417.036	296.22	852.361	693.028	2282.2	4307.53	205.331	1105.35	3652.74	15971.2	502.383	1289.63	686.101	2007.59	6306.81	181.224	6769.29	4877.8	638.162	738.473	1351.14	56.5285	577.754
Glioma29	3	Female	42	+	+	-	-	0.3	594	424	8050.53	714.123	2485.49	51.4965	67.4292	1020.83	459.77	14824.2	24.1835	35.5639	44.6683	38.409	21.0538	6.82827	472.289	2271.54	36.1329	82.5083	910.151	186.07	14092.4	2197.85	635.314	4043.19	2677.25	1695.4	2376.81	701.32	1252.7	1662.68	9456.87	19.9158	432.742	6314.44	944.577	675.714	3069.02	20.4848	2426.6
Glioma30	4	Male	44	+	-	-	+	0.07	544	411	623.933	750.256	207.124	132.582	88.483	127.177	150.791	721.805	27.3131	36.4174	0	17.3552	23.3299	3.98316	179.242	180.949	77.9561	150.506	323.205	54.9107	2585.92	66.0066	1281.15	371.287	748.549	2036.53	159.895	229.032	413.11	955.958	3071.58	3.98316	646.125	859.508	205.702	278.252	1245.02	15.0791	1607.77
Glioma31	2	Female	29	+	-	-	+	0.03	569	406	2317.39	157.67	1425.4	74.8171	79.8049	875.083	239.138	1226.17	31.3123	26.8787	8.86721	29.0955	55.143	57.0827	64.5644	2085.73	52.0949	127.466	629.018	61.7934	1343.94	78.1423	427.289	70.3835	1688.37	1543.73	170.971	966.803	202.006	453.059	4936.27	66.5041	1181.83	831.301	262.968	385.724	2468.96	26.8787	1122.81
Glioma32	4	Female	47	-	-	+	+	0.15	386	386	6616.14	113.482	880.16	0	70.0436	89.3192	45.6098	3558.11	0	28.7776	17.1037	35.0218	29.0491	17.6466	120.54	703.151	13.8458	23.0764	474.288	226.692	4283.79	174.838	60.5416	534.829	766.407	786.226	1780.68	281.26	112.939	630.393	128.413	62.7135	369.222	1922.13	311.395	344.245	30.135	16.0177	59.7271
Glioma33	4	Male	34	-	-	+	-	0.6	372	372	1639.78	894.278	1119.88	1261.33	1173.91	1350.65	231.85	1197.8	487.862	320.626	1305.85	256.284	970.023	727.313	2014.16	809.845	482.161	1237.17	664.6	661.614	7431.14	0	114.024	1658.24	1134.82	1317.53	653.74	376.824	1198.61	2689.62	928.485	293.206	738.173	2584.28	114.024	2253.34	621.433	340.445	407.502
Glioma34	3	Female	44	+	-	-	-	0.08	544	362	415.671	151.929	111.244	0	14.7946	407.705	445.829	1680.61	20.4848	15.0791	20.2003	17.3552	23.6144	4.55218	56.0487	491.351	24.7525	14.2256	52.6346	15.9326	4072.21	144.816	323.205	1101.63	3150.96	681.12	996.643	256.914	153.636	556.504	664.334	28.7356	645.271	3412.71	327.188	854.672	83.0773	11.665	567.884
Glioma35	4	Female	60	-	+	+	+	0.2	330	330	2459.54	223.62	887.83	374.086	201.175	564.731	346.653	2246.18	22.4451	56.8056	29.3726	116.936	197.573	259.643	132.177	1812.24	117.768	50.9865	498.504	325.593	2108.73	919.696	464.42	480.769	1038.85	5020.51	282.088	799.158	202.838	1028.87	1481.66	110.563	10690.5	9723.45	1126.69	482.432	1374.7	176.236	1856.3
Glioma36	1	Female	28	-	-	+	-	0.01	542	309	3003.21	148.526	382.121	0	424.241	220.572	75.6484	3611.73	0	72.3232	19.6741	150.466	261.029	361.616	1006.71	1488.58	78.6965	683.607	114.72	299.268	3433	291.787	100.033	3148.14	1220.9	1770.95	427.289	804.423	1055.2	1459.21	2009.53	164.321	691.643	5128.85	278.763	1390.49	764.243	225.006	417.867
Glioma37	3	Male	50	+	+	+	+	0.03	287	287	3450.03	364.847	363.234	23.0478	23.5088	1147.78	1810.41	1393.24	8.29723	5.301	24.4307	7.37531	6.68388	17.2859	29.9622	1624.18	24.4307	70.9874	986.909	53.471	2751.91	257.905	247.995	898.175	384.899	1658.06	105.79	372.684	48.17	330.737	627.362	19.1297	236.01	1135.34	56.2367	201.438	281.875	3.68766	148.428
Glioma38	4	Male	36	-	+	+	-	0.4	287	287	30977.8	2036.98	9795.38	588.977	356.447	4175.66	2795.79	12245.6	0	176.249	562.317	322.876	335.218	334.231	758.808	42956.3	183.654	506.036	2762.22	269.557	5944.57	670.93	1172.03	2074.5	3711.59	12853.3	3356.63	1501.32	891.118	1248.06	8485.12	737.579	4467.93	6758.67	714.375	934.069	1192.76	181.679	1987.12
Glioma39	4	Male	35	+	-	-	-	0.6	242	242	128.315	46.0908	53.4881	0	8.53534	61.1699	116.365	1121.54	2.84511	0.853534	10.2424	4.55218	3.69865	0.853534	9.10436	12.5185	1.99158	4.55218	56.9022	20.7693	1185.84	32.4343	175.543	111.528	172.983	123.478	63.7305	62.0234	51.212	248.947	148.515	1.13804	65.7221	320.36	66.8601	81.3702	42.3922	1.42256	93.8887
Glioma40	4	Female	55	-	+	+	-	0.2	23	230	1883.2	467.296	413.173	0	0	1035.11	17.88	1863.87	0	0	0	0	0	5.5573	0	690.555	37.693	1.93297	410.999	129.026	5075.02	11.1146	64.513	0	689.83	2222.68	825.138	507.164	42.5254	466.572	145.94	0	393.119	1270.69	2871.43	85.0509	21.2627	0	92.2995
Glioma41	4	Male	56	+	-	-	+	0.1	214	214	2246.74	1200.26	399.325	74.0338	62.8859	7535.16	122.627	1763.09	14.5781	25.1544	88.0402	36.0165	65.7443	26.8694	173.794	1016.75	49.737	115.196	452.207	15.1498	3135.43	1121.94	342.156	912.989	1469.24	2885.89	145.495	386.748	154.928	816.945	781.214	744.34	791.219	1839.98	714.612	724.045	156.357	67.7453	238.681
Glioma42	3	Female	77	+	+	+	-	0.1	21	210	469.929	177.51	64.601	39.7324	41.4475	814.086	102.332	567.688	5.43105	0	147.496	73.1763	7.43197	8.2895	26.2977	1175.68	2.28676	64.601	219.243	56.8831	2722.96	300.709	164.647	1091.93	580.265	1021.61	433.341	385.605	84.3243	558.827	407.901	1.14338	213.812	877.258	469.357	318.431	135.205	0	239.824
Glioma43	4	Female	67	-	+	+	-	0.2	201	201	5819.96	375.555	3288.67	31.2962	34.9949	157.619	330.033	11598.1	27.3131	32.1498	28.4511	52.3501	15.6481	0	50.9275	2898.32	13.372	57.4713	302.435	23.8989	8904.35	1539.77	422.784	2585.35	1481.45	1333.79	183.51	606.862	64.015	1633.66	705.588	21.6229	255.207	6244.45	233.868	601.172	569.876	25.3215	172.414
Glioma44	3	Female	54	+	+	+	+	0.3	18	201	1485.72	104.985	1044.44	22.1919	0	413.395	203.995	4043.76	0	0	18.4932	0	0	0	49.2204	464.607	8.53534	0	262.319	58.6093	3230.34	581.825	95.3113	349.095	631.615	890.805	378.684	242.404	112.382	1100.2	810.003	1.13804	358.769	2425.17	85.9224	548.822	683.965	0	355.924
Glioma45	4	Female	34	-	+	+	-	0.01	98	198	1652.44	361.898	930.636	139.41	60.0319	150.222	1664.11	3368.33	26.7441	40.1161	21.9074	62.0234	55.4797	4.26767	56.9022	123.478	26.7441	285.934	436.44	794.071	11200.6	363.605	632.753	205.417	1803.52	3807.9	1490.55	276.26	409.696	1793.27	1963.41	24.1835	266.872	2373.96	1657.56	631.33	209.116	62.0234	642.995
Glioma46	4	Male	55	-	+	+	+	0.6	185	185	534.798	22.9959	90.0832	4.75123	6.27162	226.348	28.8874	286.404	3.42088	3.99103	22.8059	5.32137	5.89152	30.0277	34.969	320.233	25.0865	31.9282	18.2447	15.0139	255.996	52.2635	24.7064	122.582	576.039	403.854	38.3899	192.33	88.7529	237.371	39.9103	24.8964	69.748	303.318	79.0604	91.9837	68.2276	2.85074	102.817
Glioma47	4	Male	19	-	-	+	-	0.03	84	184	1156.82	210.254	390.065	124.331	67.1446	1443.61	730.625	3185.96	1.13804	31.5807	0	21.0538	52.3501	32.1498	162.171	1103.05	49.2204	253.499	637.874	29.5892	4603.68	210.823	310.402	1464.09	1320.13	2802.72	350.518	403.152	546.262	4452.6	2490.61	93.3197	620.519	3479.86	797.485	638.159	263.457	56.9022	954.82
Glioma48	4	Male	71	-	+	+	+	0.2	17	180	1460.1	444.203	255.831	216.385	58.3124	68.6028	4.85936	1199.41	5.14521	46.021	137.206	25.1544	327.292	41.7334	70.032	723.474	47.7361	125.772	2602.9	43.1626	4020.98	119.769	60.3133	300.423	17575.2	6222.27	518.237	718.9	97.4731	610.851	776.069	29.7279	378.459	1743.37	571.976	417.619	152.07	423.622	374.457
Glioma49	4	Female	25	-	-	+	-	0.1	17	180	1098.83	170.209	559.996	136.825	66.0617	133.769	65.5915	1420.68	28.9167	74.5251	31.7378	72.8794	59.479	77.5813	138.941	942.496	11.9898	122.955	69.353	42.7873	678.719	264.012	331.719	160.335	1365.9	1596.77	165.272	430.694	327.017	525.437	279.528	131.418	360.636	1745.82	189.251	298.336	360.401	34.7941	98.975
Glioma50	4	Male	64	-	-	+	-	0.4	66	180	6106.5	8453.03	1331	752.883	792.379	3487.45	1029.85	7437.99	466.047	768.188	0	978.995	810.152	309.546	1115.25	2859.48	359.409	524.303	556.393	327.813	11202.9	314.977	2018.22	918.271	5555.04	3118.17	1690.41	1563.53	804.721	2302.09	1455.41	246.353	3079.17	2664.96	1822.22	1510.21	530.721	156.995	699.071
Glioma51	4	Female	66	-	+	+	+	0.4	174	174	621.657	133.151	250.37	603.733	278.821	194.89	404.575	1049.85	282.235	281.097	691.078	269.717	178.958	12.5185	407.989	81.3702	9.95789	334.301	592.921	143.678	3547.57	324.912	505.007	733.185	1258.39	620.803	421.077	112.382	231.308	1097.93	1834.24	7.39729	173.836	1127.8	494.48	720.951	339.137	136.565	872.027
Glioma52	4	Male	63	-	+	+	+	0.3	118	118	2150.24	153.626	109.583	2.44683	11.0107	2010.07	62.9184	1363.93	4.19456	12.2341	15.3801	6.46661	0	2.79637	27.4394	1042.7	1.39819	8.56389	106.437	16.7782	1854.17	135.1	222.486	254.994	1335.79	686.16	16.7782	239.265	42.2951	945.873	473.636	43.169	174.074	17050.4	74.803	278.414	16794.3	0.349547	96.6496
Glioma53	3	Male	44	+	-	-	+	0.01	111	111	12991.6	215.251	6010.72	20.2415	0	1249.54	679.323	9224.18	0	21.7225	53.8126	0	0	17.2793	7.40541	2976.97	9.38019	72.0793	272.025	30.1153	4205.29	394.955	2760.74	243.391	2000.94	3151.74	467.034	1014.54	301.647	1073.29	3461.29	57.7622	2748.39	2637.81	3065.35	320.407	769.669	0	2427.99
Glioma54	3	Male	53	-	-	-	-	0.01	23	30	1269.94	98.1838	100.028	191.989	246.151	949.341	59.233	1877.48	96.1095	38.0289	187.379	75.5969	81.1284	34.5718	283.028	979.534	8.06675	1239.74	277.957	260.441	4174.43	183.922	144.971	667.005	1293.68	1165.07	286.715	1007.88	25.5831	1552.73	1497.65	30.1927	544.16	1456.62	73.2922	398.036	290.864	75.136	162.487
Glioma55	4	Female	58	-	-	-	-	0.6	21	21	2.44338	1.90041	0.814461	1.90041	0	0	0	0	0	8.41609	0	0	6.78717	8.68758	14.3888	0	1.35743	11.9454	0	3.52933	2.98636	0	0	6.2442	1.62892	0	1.90041	7.33015	5.15825	4.61528	0.814461	3.80082	5.70122	4.61528	1.08595	2.44338	0	1.90041	5.15825
Healthy1		Female	55								1262.42	54.2878	38.6456	92.32	78.518	1757.76	447.798	3832.66	10.1215	7.36106	25.457	20.2429	9.50804	18.7094	88.6394	682.738	21.7765	104.588	112.563	31.2845	4598.82	849.282	307.324	1224.39	1950.07	1245.86	3497.42	998.344	239.541	1771.26	263.158	98.7609	421.114	3588.82	800.209	720.77	383.695	21.7765	526.929
Healthy2		Male	60								1147.4	756.438	932.603	257.808	74.5205	1041.92	620.548	7174.25	7.39726	27.6712	54.5205	20.274	36.7123	108.767	172.055	486.027	72.8767	329.863	494.247	120.274	6516.16	339.726	405.205	307.671	3986.85	3973.42	998.904	1223.84	646.301	5188.49	1800.27	336.712	5222.19	8994.79	2750.14	3231.23	6040	45.7534	1370.96
Healthy3		Male	60								310.959	201.096	568.219	112.877	13.6986	234.521	1268.49	789.863	4.10959	3.56164	16.9863	20	14.2466	14.5205	38.0822	372.055	47.1233	64.1096	183.562	24.1096	16475.1	6820.27	1853.7	172.329	3106.85	4321.64	225.205	331.233	112.055	1430.96	1246.85	52.0548	838.63	12177.5	906.027	659.452	546.849	13.4247	1044.11
Healthy4		Male	66								3152.88	518.082	230.137	29.3151	103.836	1405.48	743.836	805.753	0.547945	4.93151	6.30137	20.274	13.6986	45.4795	62.7397	2696.71	108.493	103.836	169.041	278.356	4863.29	273.699	629.041	241.37	1506.3	5424.38	1117.26	617.26	194.795	1816.44	4492.88	126.849	584.11	2161.64	486.575	459.178	636.986	19.726	336.712
Healthy5		Female	66								1477.26	932.603	544.384	50.6849	36.4384	647.397	389.863	2524.38	0	12.6027	0	28.7671	26.8493	43.8356	115.616	1013.42	33.6986	77.5342	549.041	63.2877	2510.96	89.0411	597.808	174.521	1234.52	1187.4	1981.64	876.438	317.26	2569.04	1395.34	167.397	441.644	2086.03	357.534	691.507	1805.75	24.3836	1750.14
Healthy6		Female	54								202.782	25.8467	7.22186	3.04078	5.51142	1124.33	160.021	433.122	1.52039	6.08157	11.9731	0.190049	0	4.18108	8.55221	172.564	12.5432	19.1949	361.473	34.779	907.674	44.4715	99.3956	21.8556	287.354	500.589	84.5718	114.79	126.573	166.673	219.697	180.927	127.523	618.99	77.54	175.605	275.951	0	47.3222
Healthy7		Female	25								67.0873	179.026	38.5799	25.0865	18.2447	523.205	110.799	232.62	0	10.4527	4.56118	22.4258	1.71044	14.0636	44.6615	72.7888	25.0865	19.1949	949.675	1.71044	2367.63	140.066	410.506	208.294	347.79	710.783	917.557	220.267	58.7251	1291.95	64.0465	37.0596	76.9698	485.955	284.313	183.017	67.6574	0.380098	149.379
Healthy8		Male	66								94.4544	134.365	29.0775	5.13132	7.41191	51.5033	266.829	1318.75	1.90049	1.90049	7.41191	1.52039	1.14029	1.71044	9.3124	116.88	9.88255	11.2129	1279.98	48.8426	1209.47	71.2684	310.54	1370.82	317.382	1377.86	63.8565	592.953	54.7341	1186.86	306.929	11.0228	328.785	885.818	35.7292	101.486	719.716	3.80098	570.527
Healthy9		Female	67								234.14	1768.98	38.96	15.394	61.0057	234.14	47.7023	710.403	0	73.739	0	0	53.0237	19.385	19.9551	70.8883	44.0914	41.4307	549.622	385.609	2278.5	355.392	88.9429	329.925	366.414	1156.26	409.936	262.838	276.521	662.511	1440	35.7292	210.384	1612.38	33.2586	254.096	644.456	83.4315	735.3
Healthy10		Male	69								322.133	119.351	556.654	0	6.46167	526.816	95.0245	242.503	0	3.80098	4.56118	0	0	1.90049	1.52039	791.934	0	42.3809	103.767	26.6069	1816.11	439.203	243.453	435.592	255.996	848.189	168.764	313.771	338.857	518.644	797.066	17.1044	144.627	1936.98	77.54	295.716	96.7349	0	325.934
Healthy11		Male	45								668.801	179.722	134.546	0	46.5509	1370.21	75.8171	718.495	2.74984	2.94626	6.28536	2.94626	22.7844	16.4991	64.6213	824.756	281.073	160.473	25.7307	237.469	2164.91	377.318	379.675	109.012	1973.8	774.474	162.241	549.183	116.279	1689.19	5112.15	57.9431	1316.39	1004.09	37.7121	489.079	358.658	29.0698	556.647
Healthy12		Male	36								792.329	355.068	313.425	34.7945	26.0274	916.438	242.74	1676.99	4.65753	9.58904	38.6301	21.3699	18.6301	41.9178	140	595.342	285.205	113.425	596.712	41.6438	5747.12	1278.9	360.822	1322.47	3834.52	3070.68	1459.45	1071.23	525.205	3490.96	1136.16	210.137	1258.36	6759.18	414.795	908.493	3301.37	41.6438	238.356
Healthy13		Female	67								441.743	290.501	75.8171	0	26.9092	429.958	76.0135	532.291	4.32118	4.91043	10.0173	7.07102	54.4076	17.874	66.3891	342.159	21.8023	53.8184	34.1766	11.3922	4894.33	205.453	83.0845	91.5305	1910.75	3311.01	117.85	252.986	194.65	719.477	649.749	40.2656	999.568	1918.41	182.275	348.052	1038.65	49.89	139.26
Healthy14		Male	49								107.637	127.082	21.2131	13.7492	27.302	132.189	62.8536	197.399	1.96417	4.32118	12.9635	3.14268	21.2131	21.4095	36.1408	84.8523	25.1414	35.3551	113.333	73.4601	1350.96	54.9969	44.7832	105.869	1249.21	2527.11	43.9975	297.965	98.2087	539.755	1730.24	4.91043	795.294	1180.27	259.86	128.85	1091.1	0	188.168
Healthy15		Male	25								731.458	317.214	14.142	0	92.709	734.012	103.316	2384.11	3.92835	5.49969	9.23162	2.35701	68.7461	29.2662	105.673	994.657	133.367	208.006	51.0685	189.739	10777.2	312.304	285.591	459.224	1451.92	6254.91	301.304	1235.66	241.201	4044.63	2967.87	466.295	1505.93	2703.29	111.172	864.236	1154.74	42.6226	135.528
Healthy16		Female	26								2115.81	90.5484	155.563	0	13.16	3383.09	187.775	1595.3	4.32118	9.62445	0	2.35701	24.5522	123.547	47.1402	1549.93	31.4268	242.575	442.921	23.3737	3345.38	412.084	301.501	3457.14	2480.16	3895.94	283.627	933.572	361.997	2114.04	8163.1	103.905	2585.83	4172.69	454.117	746.582	741.672	12.5707	303.268
Healthy17		Male	68								20.8681	9.48551	3.03536	2.46623	23.9035	25.0417	8.34725	261.041	0.948551	1.70739	2.46623	0.37942	114.585	0.75884	25.4212	5.31188	5.50159	44.2025	12.3312	15.5562	1301.22	68.2956	64.5014	59.569	876.461	1364.21	71.7104	84.8004	16.5048	737.783	407.497	3.41478	457.581	1030.88	4.36333	259.713	57.8616	555.851	18.7813
Healthy18		Female	56								1937.89	150.061	48.3761	0	15.7459	2276.9	162.012	921.801	1.32797	3.03536	3.7942	0	3.7942	17.8328	18.7813	306.951	23.7138	210.768	238.466	83.093	2073.72	0	112.878	1720.67	1554.86	3415.16	272.234	469.533	566.474	1399.11	7966.12	17.2636	1426.05	2850.77	321.369	848.953	811.011	16.1254	183.639
Healthy19		Female	16								761.117	296.896	42.4951	36.9935	214.752	620.921	281.34	1235.01	5.31188	18.971	0	25.4212	63.7426	72.659	135.832	931.097	22.5755	139.058	98.6493	1481.45	5380.37	0	297.845	696.426	1980.38	4755.65	436.523	703.635	277.546	1529.44	18082.2	98.0801	797.541	2474.77	143.231	1286.99	1414.67	43.2539	1621.26
Healthy20		Female	34								277.356	126.537	34.5272	27.508	26.7491	162.392	95.0448	530.809	0	7.01927	9.67522	9.67522	18.971	9.67522	15.5562	1022.73	45.151	62.6043	41.9259	6.63985	1777.01	300.501	153.475	1294.96	977.956	1219.27	82.7136	361.587	1892.93	661.329	123.501	31.6816	947.412	1672.11	88.0255	229.929	177.189	27.508	118.379
Healthy21		Male	49								1269.04	38.0822	178.63	0	66.3014	821.644	71.2329	4222.74	0	6.84932	0	0	31.2329	12.6027	217.26	347.123	1130.68	22.7397	47.1233	26.5753	5418.36	199.178	147.945	0	3684.66	297.808	2262.74	3967.67	28.2192	1482.74	902.466	4685.48	399.726	1267.67	6.30137	641.644	18.0822	0.273973	36.4384
Healthy22		Female	58								343.755	213.614	154.045	34.717	18.971	601.002	170.549	1690.51	7.96783	14.418	37.5626	7.20898	17.0739	1.8971	91.63	217.218	14.2283	37.942	600.053	23.9035	2582.71	346.6	1799.02	919.525	754.287	773.638	235.62	172.067	183.829	769.844	1098.8	49.8938	147.025	2563.74	138.299	426.848	793.178	17.0739	872.097
Healthy23		Male	57								184.535	1119.6	145.443	29.6228	34.7218	329.007	605.568	616.008	19.182	2.4281	48.0763	36.1787	27.1947	3.64215	61.9165	88.14	18.2107	189.392	489.99	117.52	4818.32	460.61	248.637	97.6095	1369.69	677.196	1901.69	191.091	235.525	1373.33	1622.45	57.0603	276.803	2011.44	710.947	490.233	1419.95	19.6676	651.944
Healthy24		Female	50								1925.72	1059.62	218.529	51.4757	67.9867	554.578	196.919	1335.45	63.3734	19.182	117.52	83.5266	82.5553	88.3828	184.778	505.044	148.114	823.125	125.047	120.191	2609.23	273.404	339.934	249.608	1775.18	2061.46	504.559	271.461	384.611	1508.09	4294.58	357.659	505.044	4031.37	1179.33	360.087	1631.68	51.4757	1934.95
Healthy25		Male	58								1672.72	347.704	91.2965	19.182	175.066	1112.8	1431.85	960.798	41.5205	11.6549	49.2904	31.8081	117.034	236.74	254.222	1227.4	378.298	538.309	182.593	446.77	4920.78	129.175	472.022	342.847	2451.16	7170.42	5966.81	437.3	482.22	463.038	2712.67	168.51	915.878	6963.54	593.67	1244.16	2488.31	98.5808	1078.56
Healthy26		Female	66								696.136	163.168	88.3828	26.4663	59.974	5084.68	150.542	578.373	29.1372	11.1692	22.0957	49.2904	56.0891	30.594	32.7793	619.408	28.4087	74.057	40.0636	25.0094	2369.58	247.909	58.2743	345.761	2105.4	1227.89	237.468	361.544	434.872	1294.9	346.49	36.1787	410.349	898.153	28.4087	217.315	362.272	21.8529	80.6128
Healthy27		Female	49								159.526	55.3606	14.083	0	11.4121	304.726	136.459	524.226	11.6549	3.88496	22.0957	5.34182	28.6516	33.2649	44.4342	586.628	38.3639	42.2489	25.2522	4.37058	2308.88	416.904	45.4054	675.74	2037.17	1218.91	1910.67	367.857	108.779	1764.74	193.762	50.5044	735.228	3364.86	1273.05	540.252	163.897	7.28429	128.446
Healthy28		Female	49								1421.6	1275.3	156.116	172.985	113.79	249.663	433.076	1774.94	23.6167	233.1	413.446	106.122	121.457	7.97448	115.323	737.64	17.4825	358.545	8312.48	187.4	6618.21	782.726	1039.75	327.567	2378.54	5316.22	6575.57	565.268	861.857	2817.75	4651.58	75.4509	1760.21	4811.37	4335.36	1065.21	4794.81	131.886	1711.14
Healthy29		Male	50								843.455	187.4	7.36106	0	32.5113	94.1602	151.822	468.041	1.53355	4.60066	12.2684	10.4282	12.2684	17.7892	21.4698	224.819	25.7637	109.496	123.604	49.0737	1170.1	331.554	33.7382	67.7831	1576.19	1085.76	63.1824	237.394	45.6999	390.75	147.221	12.8819	277.88	1040.06	71.4636	427.862	66.2495	7.05435	529.076
Healthy30		Male	55								2285.92	755.735	240.768	146.914	587.045	336.155	253.65	2151.27	0	62.2623	289.535	149.368	395.044	364.372	282.174	2271.81	167.464	615.569	484.91	314.992	4747.58	456.079	692.553	879.647	4055.64	1652.25	640.719	639.185	2532.82	1418.54	2383.14	328.794	712.183	2550.91	582.751	605.447	998.957	298.43	819.531
[truncated: 55 more columns]
