# Supplementary material for: Multiomics Integration of Serum Proteome and Autoantibody Profiles Reveals Diagnostic and Prognostic Biomarkers in Glioma
Source: Research Square preprint supplement (doi:10.21203/rs.3.rs-7933102/v1), 2025-11-05
Supplement: Supplementary file 4 [file b838898a0011feb47eb31a1b.xlsx]

## Sheet: Sheet1
Peptides	Start position	End position	Sequence
APOE-1	149	164	EELRVRLASHLRKLRK
COL1A2-1	1249	1264	EMATQLAFMRLLANYA
COL1A2-2	1	16	MLSFVDTRTLLLLAVT
COL1A2-3	1187	1202	TMDAIKVYCDFSTGET
COL2A1-1	1270	1285	LRQHDAEVDATLKSLN
COL2A1-2	1254	1269	GVHATLKSLSSQIETM
COL2A1-3	1381	1396	IRFRYIVLQDTCSKRN
COL5A2-1	900	915	GVHATLKSLSSQIETM
COL5A2-2	1082	1097	IRFRYIVLQDTCSKRN
EGFR-1	393	408	ITSLGLRSLKEISDGD
EGFR-2	726	741	HVCRLLGICLTSTVQL
EGFR-3	363	378	NRTDLHAFENLEIIRG
EGFR-4	814	829	HVKITDFGLAKLLGAE
EGFR-5	757	772	NWCVQIAKGMNYLEDR
EGFR-6	295	310	VCNGIGIGEFKDSLSI
EGFR-7	309	324	SLSINATNIKHFKNCT
IGFBP1-1	161	176	DAISTYDGSKALHVTN
IL-1β -1	135	150	ALGLKEKNLYLSCVLK
IL-1β-2	74	89	TFQENDLSTFFPFIFE
MMP2-1	67	84	LRFSRIHDGEADIMIN
MMP2-2	378	393	EICKQDIVFDGIAQIR
MMP3-1	128	145	KDAVDSAVEKALKVWE
MMP3-2	144	161	EADIMIISFAVREHGD
P53-1	194	209	HLIRVEGNLRVEYLDD
P53-2	30	45	TFSDLWKLLPENNVLS
S100A12-1	25	40	HFDTLSKGELKQLLTK
S100A4-1	38	53	LTRELPSFLGKRTDEA
S100A4-2	5	20	PLEKALDVMVSTFHKY
S100A6-1	94	94	VTFLGALALIYNEALK
S100A8-1	27	42	FHAVYRDDLKKLLETE
SAA4-1	1	16	MRLFTGIVFCSLVMGV
SAA4-2	94	109	LIDCYLFGNSSTVLED
